# Supplementary material for: Benzylamine promoted direct C–H arylation of arenes and heteroarenes via excitation with heat or light
Source: Royal Society of Chemistry journal article supplement (doi:10.1039/d4ob01377h), 2024-01-01
Supplement: d4ob01377h1.pdf [file d4ob01377h1.pdf]

## Electronic Supporting Information

### **Benzylamine promoted direct C–H arylation of arenes and heteroarenes via excitation with heat or light**

Souvik Chatterjee,<sup>a‡</sup> Sabnam Azmi,<sup>a‡</sup> Nilaj Bandopadhyay,<sup>a</sup> Krishnendu Paramanik,<sup>a</sup> Gayetri Sarkar,<sup>a</sup> Bhaskar Biswas<sup>\*,a</sup> and Hari Sankar Das<sup>\*,a</sup>

<sup>[a]</sup> Souvik Chatterjee, Sabnam Azmi, Nilaj Bandopadhyay, Krishnendu Paramanik, Gayetri Sarkar, Bhaskar Biswas, Hari Sankar Das  
Department of Chemistry, University of North Bengal, Darjeeling 734013, India  
E-mail: [bhaskarbiswas@nbu.ac.in](mailto:bhaskarbiswas@nbu.ac.in), [harisankardas@nbu.ac.in](mailto:harisankardas@nbu.ac.in)

## Table of Contents

|                                                                                                                |     |
|----------------------------------------------------------------------------------------------------------------|-----|
| 1. General procedure for optimization of the <b>1</b> promoted C–H arylation of benzene with iodobenzene ..... | S1  |
| 2. Kinetic Study.....                                                                                          | S1  |
| 3. Procedure for gram-scale synthesis of <b>7a</b> .....                                                       | S2  |
| 4. Mechanistic studies.....                                                                                    | S3  |
| 5. The analytical and spectroscopic characterization data of the products .....                                | S7  |
| 6. <sup>1</sup> H NMR and <sup>13</sup> C NMR spectra of the products .....                                    | S20 |
| 7. Theoretical calculation .....                                                                               | S79 |
| 8. References.....                                                                                             | S80 |

## 1. Optimization of the 1-promoted C–H arylation of benzene with iodobenzene under heating condition:

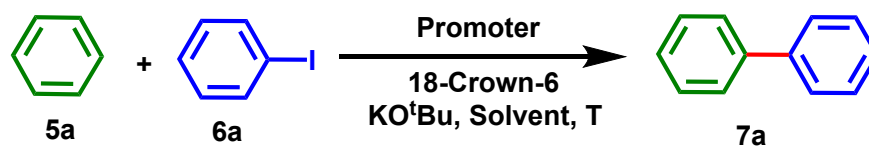

**Scheme S1.** 1-promoted C–H arylation of benzene with iodobenzene.

In a pressure tube, KO<sup>t</sup>Bu (0-3 mmol) promotor **1-4** (0-0.3 mmol) and benzene (1.5 mL) were added under inert condition. An instant colour change from colorless to red was observed. After that, substrate iodobenzene (1 mmol) and 18-crown-6 (0-1 mmol) were added, and then the resulting mixture was stirred for 30-36 h at 80-90 °C under an inert atmosphere. Next, the reaction mixture was cooled down to room temperature and quenched with water (4 mL). After quenching, the biphenyl product **7a** was extracted with 30 mL (3 x 10 mL) of ethyl acetate and the combined organic part was dried over anhydrous sodium sulfate. The organic part was evaporated under reduced pressure leads to the crude **7a** which was further purified by column chromatography on silica gel using hexane as eluent to get the pure **7a**.

## 2. Kinetic Study

**Table S1.** Yield of benzylamine hydrochloride salt (**4a**) at different time intervals.

| Entry | Reaction time | Yield (%) <sup>[a]</sup> |
|-------|---------------|--------------------------|
| 1     | 5 h           | 18                       |
| 2     | 10 h          | 39                       |
| 3     | 15 h          | 57                       |
| 4     | 20 h          | 68                       |
| 5     | 25 h          | 76                       |
| 6     | 30 h          | 82                       |
| 7     | 35 h          | 86                       |
| 8     | 40 h          | 86                       |

**5a** + **6a**  $\xrightarrow[\text{KO}^t\text{Bu (3 equiv.), 90 °C, 5-40 h}]{\text{1 (30 mol\%), 18-Crown-6 (1 equiv.)}}$  **7a**

1.5 mL      1 mmol

<sup>[a]</sup> Isolated yield.

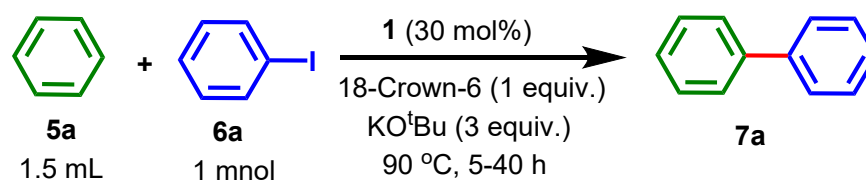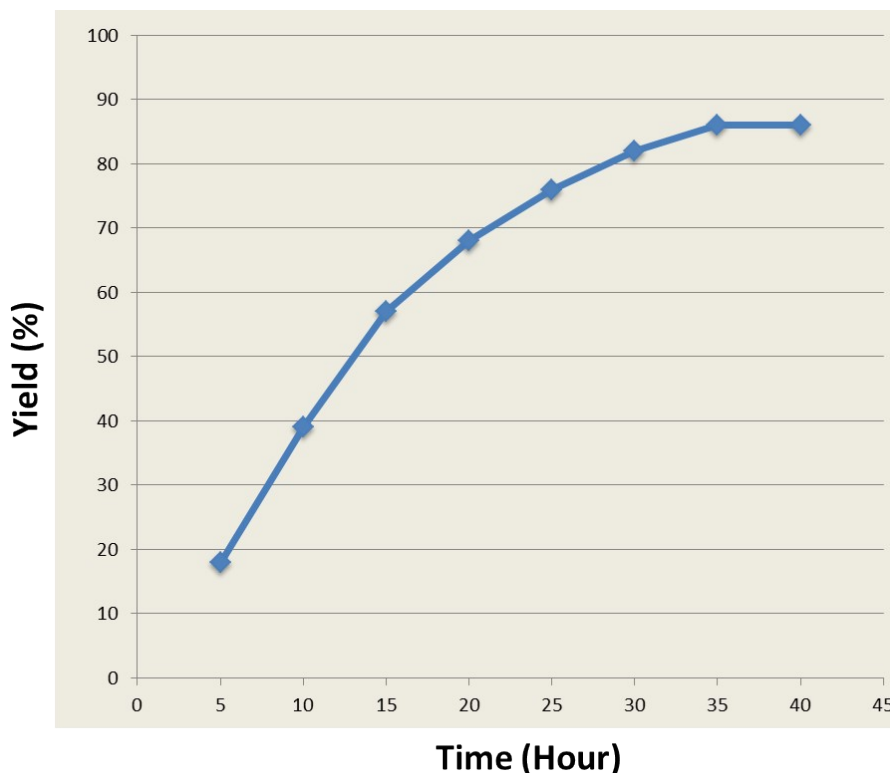

**Figure S1.** Graphical representation of yield of C–H arylation of benzene (**7a**) vs time.

### 3. Procedure for gram-scale synthesis of **7a**:

In a pressure tube, KO<sup>t</sup>Bu (1.68 g, 15 mmol, 3.0 equiv.), promotor **1** (161 mg, 1.5 mmol) and benzene (7.5 mL) were added under inert condition. After that, iodobenzene (1.02 g, 5 mmol) and 18-crown-6 (1.32 g, 5 mmol) were added, and then the resulting mixture was stirred for 36 h at 90 °C under an inert atmosphere. Next, the reaction mixture was cooled down to room temperature and quenched with water (20 mL). After quenching, the arylated products were extracted with 150 mL (3 x 50 mL) of ethyl acetate and the combined organic part was dried over anhydrous sodium sulfate. The organic part was evaporated under reduced pressure leads to the crude arylated product which was further purified by column chromatography on silica gel using hexane as eluent. The yield of the isolated pure compound is 618 mg (80 %).



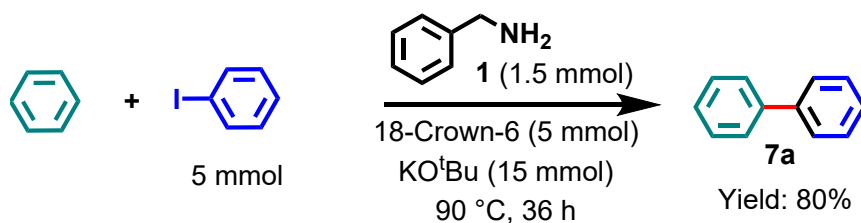

**Scheme S2:** 1-promoted C–H arylation of benzene in gram-scale.

#### 4. Mechanistic studies

##### 4.1. 1-promoted C–H arylation of toluene using iodobenzene in presence of excess TEMPO:

In a pressure tube, KO<sup>t</sup>Bu (336 mg, 3 mmol, 3.0 equiv.), promotor **1** (32 mg, 30 mol %) and toluene (1.5 mL) were added under inert condition. After that, TEMPO (0-2 mmol), iodobenzene (1 mmol) and 18-crown-6 (264 mg, 1 equiv.) were added, and then the resulting mixture was stirred for 36 h at 90 °C under an inert atmosphere. Next, the reaction mixture was cooled down to room temperature and quenched with water (4 mL). After quenching, the arylated products were extracted with 30 mL (3 x 10 mL) of ethyl acetate and the combined organic part was dried over anhydrous sodium sulfate. The organic part was evaporated under reduced pressure leads to the crude mixture of phenyl-toluene and TEMPO-trapped radical. Further purification by column chromatography on silica gel using hexane/ethylacetate as eluent leads to the pure phenyl-toluene product and TEMPO-trapped radical (**5a'**). The **5a'** was isolated with 64% yield when 2 equivalent TEMPO was used in the reaction mixture.

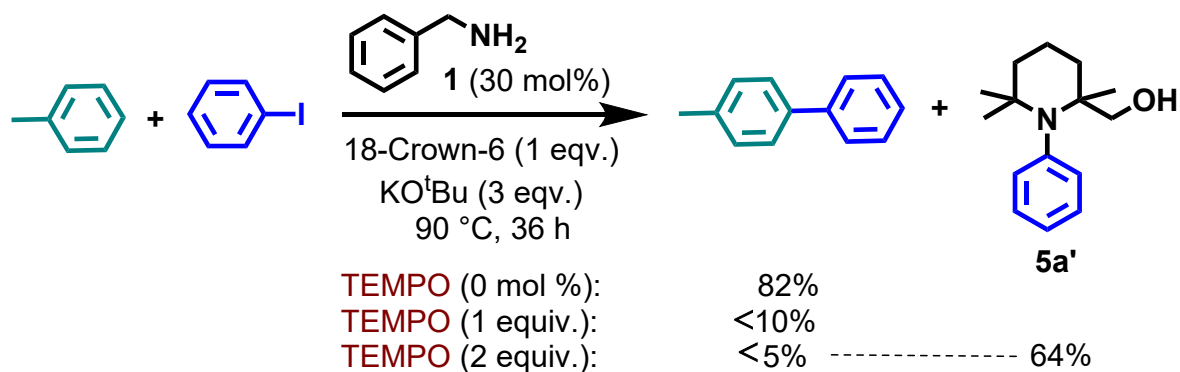

**Scheme S3.** 1-catalysed C–H arylation of furan in presence of TEMPO.

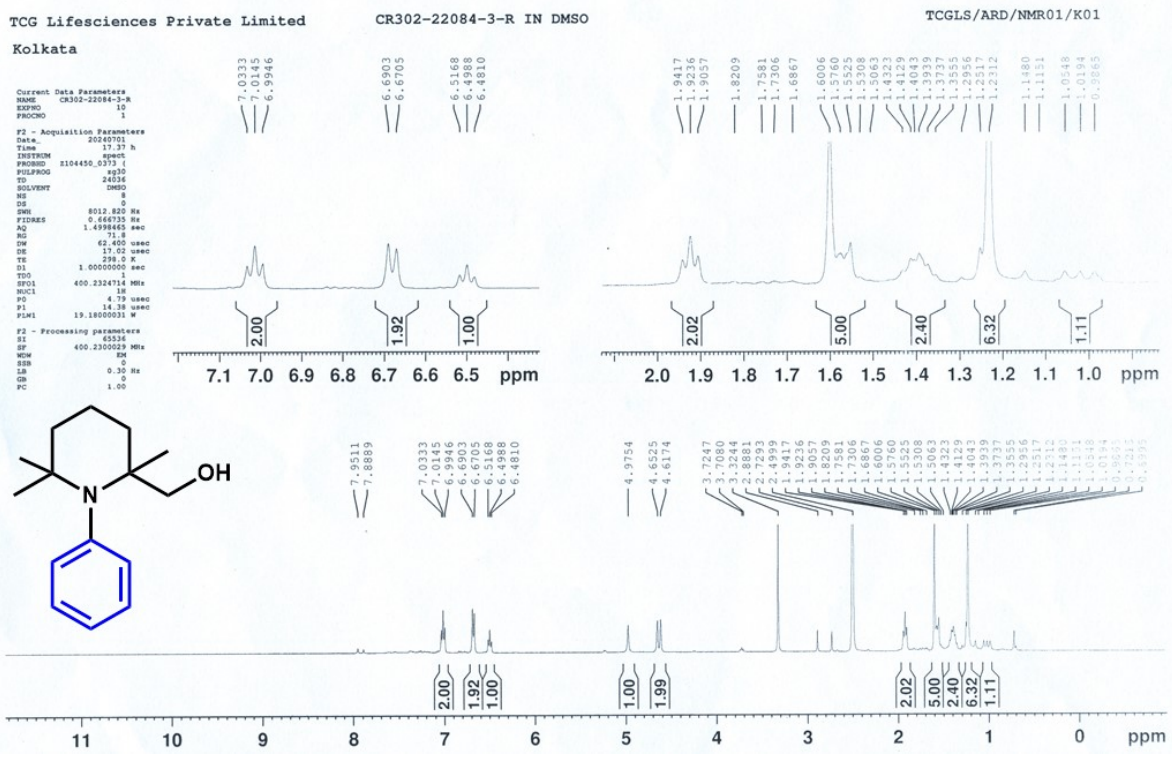

Figure S2: <sup>1</sup>H NMR spectrum of 5a'.

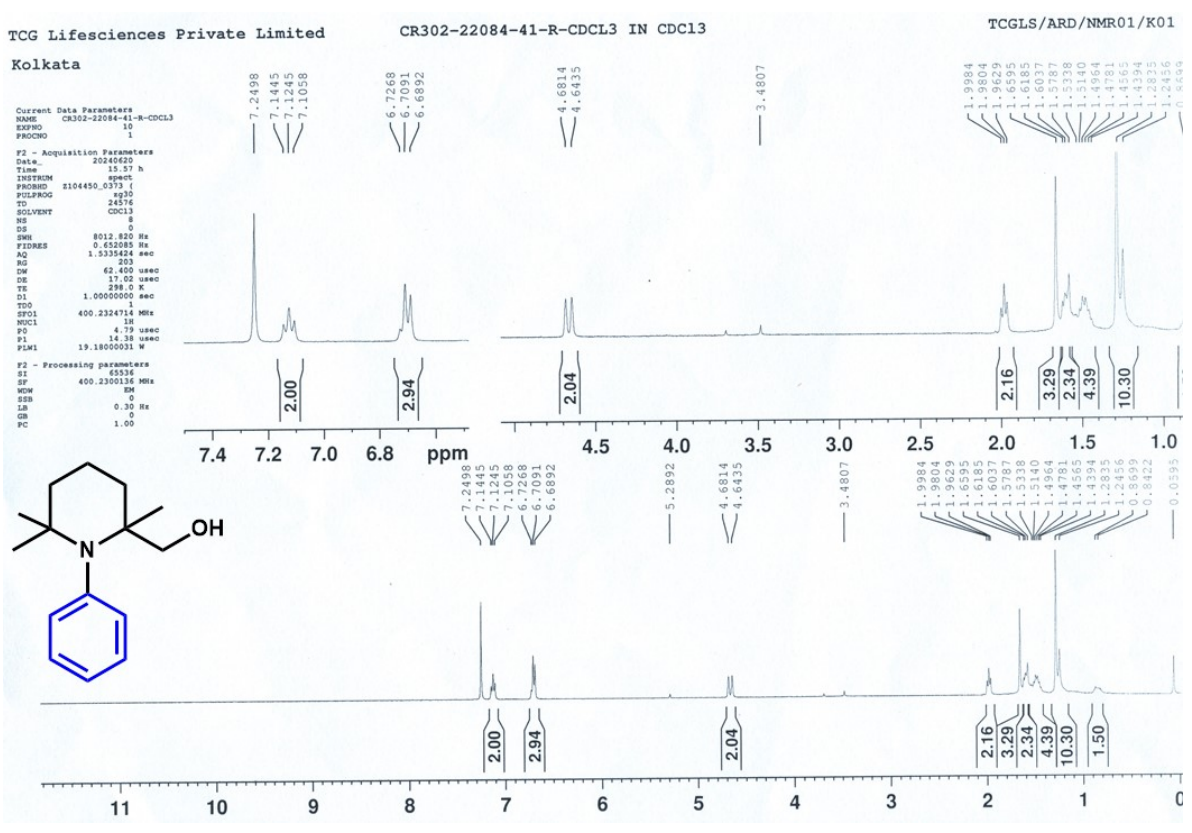

Figure S3: <sup>13</sup>C {<sup>1</sup>H} NMR spectrum of 5a'.

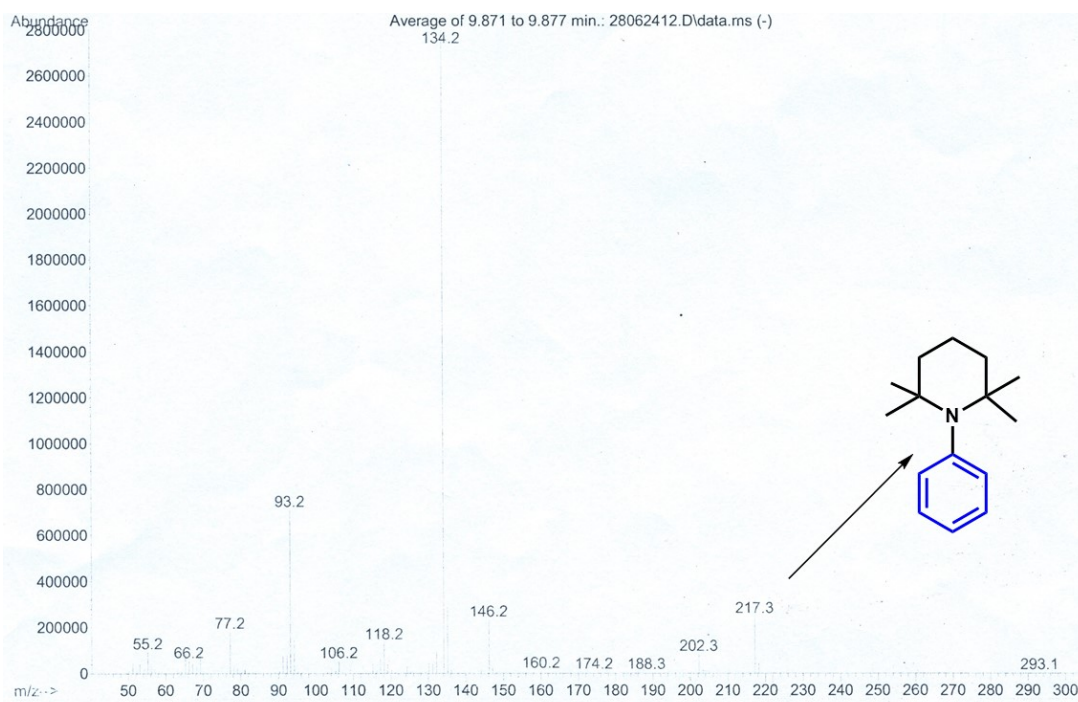

**Figure S4:** GC-MS spectrum of **5a'**.

#### 4.2. Kinetic isotope effect experiment.

In a pressure tube, KO<sup>t</sup>Bu (336 mg, 3 mmol, 3.0 equiv.), promotor **1** (32 mg, 30 mol %) and 1:1 mixture of benzene and benzene-d<sub>6</sub> (0.75 mL + 0.75 mL) were added under inert condition. After that, iodobenzene (1 mmol) and 18-crown-6 (264 mg, 1 equiv.) were added, and then the resulting mixture was stirred for 36 h at 90 °C under an inert atmosphere. Next, the reaction mixture was cooled down to room temperature and quenched with water (4 mL). After quenching, the arylated products were extracted with 30 mL (3 x 10 mL) of ethyl acetate and the combined organic part was dried over anhydrous sodium sulfate. The organic part was evaporated under reduced pressure and then purified by column chromatography on silica gel using hexane as eluent. The GC-MS analysis indicates the formation of 1:1 mixture of phenyl-benzene **7a** and deuterated phenyl-benzene **7a'**.

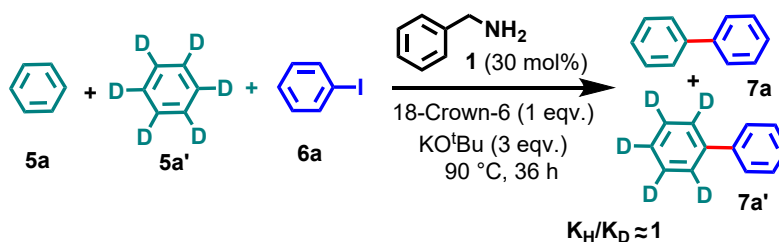

**Scheme S4.** Kinetic isotope effect experiment.

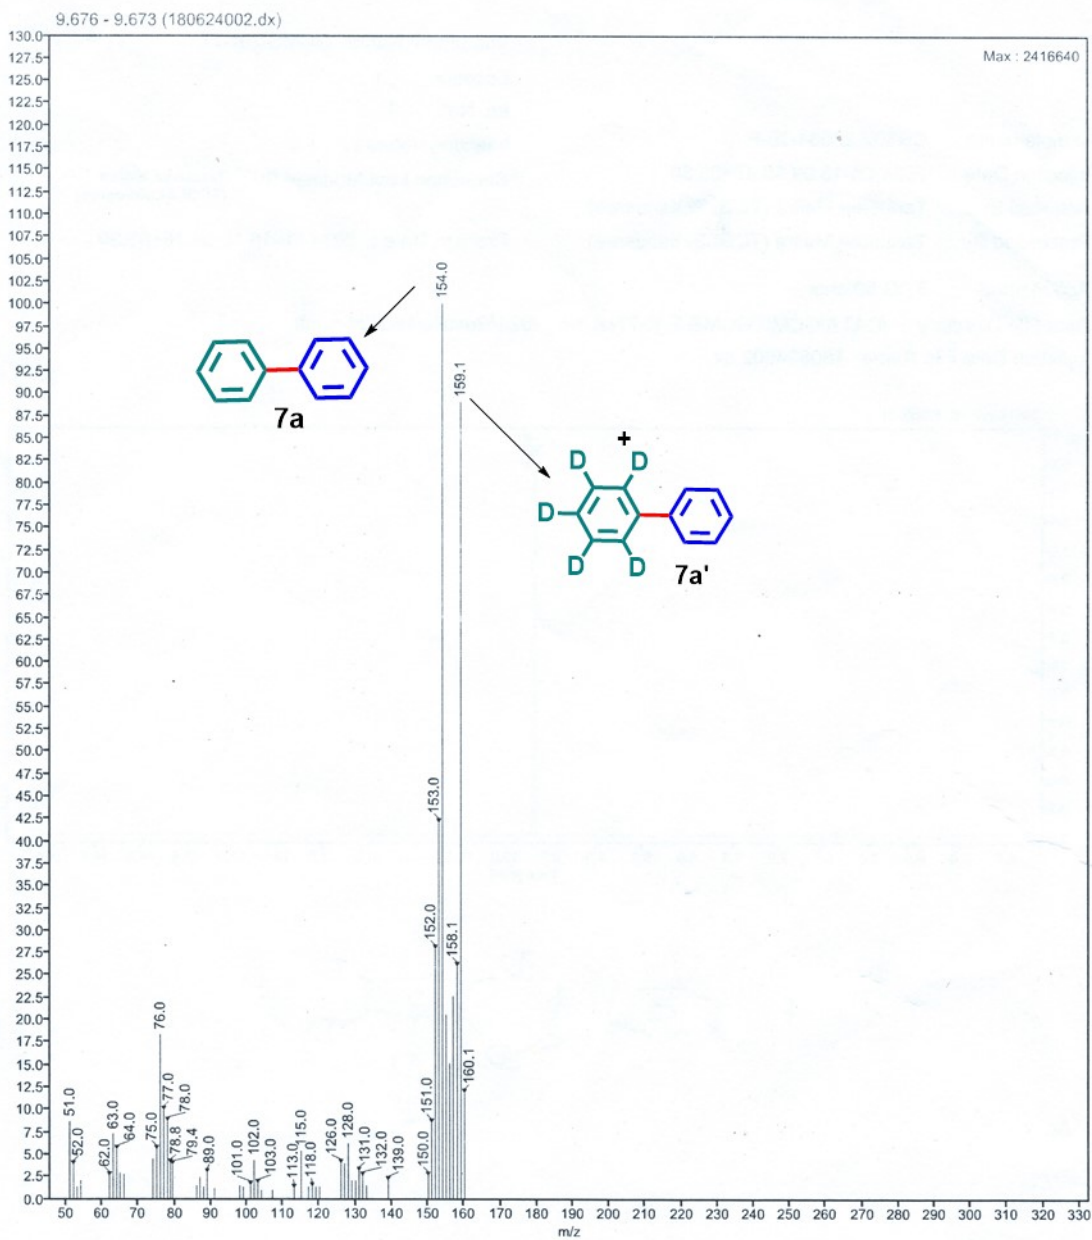

**Figure S5:** GC-MS spectrum of the mixture of 7a and 7a'.

## 5. The analytical and spectroscopic characterization data of the products:

### Phenylbenzene, 7a<sup>1</sup>

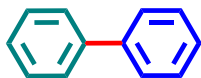

White solid. The crude product was purified by column chromatography using Merck silica gel 100-200 mesh with hexane.

<sup>1</sup>H NMR (400 MHz, DMSO-d<sub>6</sub>)  $\delta$  (ppm): 7.65 (d,  $J$  = 7.1 Hz, 4H), 7.46 (t,  $J$  = 7.6 Hz, 4H), 7.36 (t,  $J$  = 7.7 Hz, 2H).

<sup>13</sup>C NMR (100 MHz, DMSO-d<sub>6</sub>)  $\delta$  (ppm): 140.09, 128.82, 127.52, 127.31, 126.59.

GC-MS: calc. for 7a: 154.2; found: 154.2.

### 4-Methylphenylbenzene, 7b<sup>2</sup>

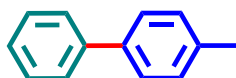

White crystalline solid. The crude product was purified by column chromatography using Merck silica gel 100-200 mesh with hexane.

<sup>1</sup>H NMR (400 MHz, DMSO-d<sub>6</sub>)  $\delta$  (ppm): 7.72-7.68 (m, 2H), 7.63 (d,  $J$  = 7.3 Hz, 2H), 7.46 (t,  $J$  = 8 Hz, 2H), 7.36 (t,  $J$  = 7.3 Hz, 1H), 7.29 (t,  $J$  = 8.3 Hz, 2H).

<sup>13</sup>C NMR (100 MHz, DMSO-d<sub>6</sub>)  $\delta$  (ppm): 140.00, 137.20, 136.58, 129.40, 128.76, 126.99, 126.38, 126.30, 20.54.

GC-MS: calc. for 7b: 168.2; found: 168.2.

### 4-Methoxybiphenyl, 7c<sup>3</sup>

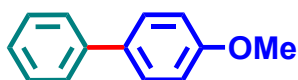

White solid. The crude product was purified by column chromatography using Merck silica gel 100-200 mesh with hexane.

<sup>1</sup>H NMR (400 MHz, DMSO-d<sub>6</sub>)  $\delta$  (ppm): 7.60 (m, 4H), 7.42 (t,  $J$  = 8 Hz, 2H), 7.31 (t,  $J$  = 8 Hz, 1H), 7.01 (d,  $J$  = 6 Hz, 2H).

<sup>13</sup>C NMR (100 MHz, DMSO-d<sub>6</sub>)  $\delta$  (ppm): 158.80, 139.74, 132.43, 128.76, 127.65, 126.60, 126.08, 114.26, 55.06.

GC-MS: calc. for 7c: 184.2; found: 184.2.



### 2-Aminobiphenyl, 7d<sup>4</sup>

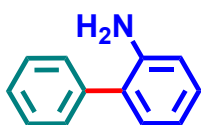

White solid. The crude product was purified by column chromatography using Merck silica gel 100-200 mesh with hexane.

**<sup>1</sup>H NMR** (400 MHz, DMSO-d<sub>6</sub>)  $\delta$  (ppm): 7.43 (m, 4H), 7.33 (t,  $J = 6.9$  Hz, 1H), 7.04 (t,  $J = 7.3$  Hz, 1H), 6.98 (d,  $J = 7.2$  Hz, 1H), 6.76 (d,  $J = 7.8$  Hz, 1H), 6.64 (t,  $J = 7.3$  Hz, 1H).

**<sup>13</sup>C NMR** (100 MHz, DMSO-d<sub>6</sub>)  $\delta$  (ppm): 145.58, 138.95, 128.49, 127.16, 125.05, 124.38, 120.44, 116.85, 115.51, 115.02.

**GC-MS**: calc. for 7d: 169.1; found: 169.1.

### 4-Fluorobiphenyl, 7e<sup>5</sup>

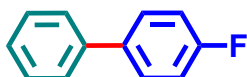

White solid. The crude product was purified by column chromatography using Merck silica gel 100-200 mesh with hexane.

**<sup>1</sup>H NMR** (400 MHz, DMSO-d<sub>6</sub>)  $\delta$  (ppm): 7.43 (m, 4H), 7.33 (t,  $J = 6.9$  Hz, 1H), 7.04 (t,  $J = 7.3$  Hz, 1H), 6.98 (d,  $J = 7.2$  Hz, 1H), 6.76 (d,  $J = 7.8$  Hz, 1H), 6.64 (t,  $J = 7.3$  Hz, 1H).

**<sup>13</sup>C NMR** (100 MHz, DMSO-d<sub>6</sub>)  $\delta$  (ppm): 139.06, 136.58, 136.55, 128.86, 128.61, 128.53, 127.31, 126.55, 115.72, 115.50.

**GC-MS**: calc. for 7e: 172.2; found: 172.2.

### 4-(Trifluoromethyl)biphenyl, 7f<sup>6</sup>

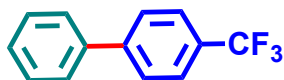

White solid. The crude product was purified by column chromatography using Merck silica gel 100-200 mesh with hexane.

**<sup>1</sup>H NMR** (400 MHz, DMSO-d<sub>6</sub>)  $\delta$  (ppm): 7.89 (d,  $J = 8.0$  Hz, 2H), 7.81 (d,  $J = 8.0$  Hz, 2H), 7.74 (d,  $J = 7.6$  Hz, 2H), 7.52 (t,  $J = 7.2$  Hz, 2H), 3.79 (s, 3H), 7.45 (t,  $J = 7.2$  Hz, 1H).

**<sup>13</sup>C NMR** (100 MHz, DMSO-d<sub>6</sub>)  $\delta$  (ppm): 144.07, 138.50, 129.00, 128.33, 127.91, 127.59, 127.36, 126.93, 125.65, 125.61.

**GC-MS**: calc. for 8h: 222.2; found: 222.2.

### 2-Methoxy-6-phenylnaphthalene, 7g<sup>7</sup>

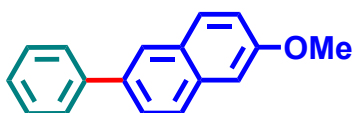

White solid. The crude product was purified by column chromatography using Merck silica gel 100-200 mesh with hexane.

**<sup>1</sup>H NMR** (400 MHz, DMSO-d<sub>6</sub>)  $\delta$  (ppm): 8.14 (s, 1H), 7.90 (d,  $J$  = 8.8 Hz, 2H), 7.79 (t,  $J$  = 7.2 Hz, 3H), 7.49 (t,  $J$  = 7.8 Hz, 2H), 7.35 (m, 2H), 7.19 (dd,  $J$  = 8.9 and 2.4 Hz, 1H), 3.89 (s, 3H).

**<sup>13</sup>C NMR** (100 MHz, DMSO-d<sub>6</sub>)  $\delta$  (ppm): 157.32, 140.00, 135.06, 133.45, 129.63, 128.78, 128.66, 127.25, 127.09, 126.59, 125.35, 124.96, 119.61, 105.94, 55.17, 55.11.

**GC-MS:** calc. for 7f: 234.2; found: 234.2.

### p-Terphenyl, 7h<sup>8</sup>

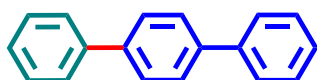

White solid. The crude product was purified by column chromatography using Merck silica gel 100-200 mesh with hexane.

**<sup>1</sup>H NMR** (400 MHz, DMSO-d<sub>6</sub>)  $\delta$  (ppm): 7.78 (s, 4H), 7.72 (d,  $J$  = 7.7 Hz, 4H), 7.49 (t,  $J$  = 7.6 Hz, 4H), 7.39 (t,  $J$  = 7.8 Hz, 2H).

**<sup>13</sup>C NMR** (100 MHz, DMSO-d<sub>6</sub>)  $\delta$  (ppm): 139.50, 139.04, 128.89, 127.42, 127.08, 126.46.

**GC-MS:** calc. for 7g: 234.2; found: 234.2.

### 9-Hydroxy-5-phenyl-1H-phenalen-1-one, 7i<sup>9</sup>

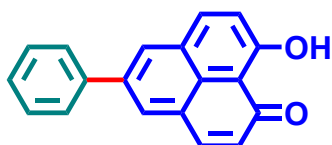

Yellow solid. The crude product was purified by column chromatography using Merck silica gel 100-200 mesh with hexane/DCM.

**<sup>1</sup>H NMR** (400 MHz, DMSO-d<sub>6</sub>)  $\delta$  (ppm): 14.08 (s, 1H), 8.66 (s, 2H), 8.49 (d,  $J$  = 8.2 Hz, 2H), 7.90 (d,  $J$  = 7.6 Hz, 2H), 7.57 (t,  $J$  = 7.9 Hz, 2H), 7.45 (t,  $J$  = 7.6 Hz, 1H), 7.29 (d,  $J$  = 9.3 Hz, 2H).

**<sup>13</sup>C NMR** (100 MHz, DMSO-d<sub>6</sub>)  $\delta$  (ppm): 178.36, 142.24, 138.86, 136.35, 131.64, 129.09, 127.82, 126.93, 125.60, 125.04, 123.37.

GC-MS: calc. for **7h**: 273.1; found: 273.1.

### 2-phenylthiophene, **7j**<sup>10</sup>

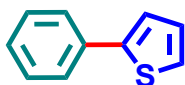

Yellow solid. The crude product was purified by column chromatography using Merck silica gel 100-200 mesh with hexane.

<sup>1</sup>H NMR (400 MHz, DMSO-d<sub>6</sub>)  $\delta$  (ppm): 7.87 (s, 1H), 7.71 (d,  $J = 7.8$  Hz, 2H), 7.64 (t,  $J = 2.8$  Hz, 1H), 7.56 (d,  $J = 4.8$  Hz, 1H), 7.41 (t,  $J = 8.0$  Hz, 2H), 7.29 (t,  $J = 6.3$  Hz, 1H).

<sup>13</sup>C NMR (100 MHz, DMSO-d<sub>6</sub>)  $\delta$  (ppm): 141.33, 135.02, 128.76, 126.98, 126.96, 126.05, 125.95, 120.82.

GC-MS: calc. for **7i**: 160.2; found: 160.2.

### 4-Phenylpyridine, **7k**<sup>11</sup>

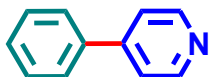

Yellow solid. The crude product was purified by column chromatography using Merck silica gel 100-200 mesh with hexane.

<sup>1</sup>H NMR (400 MHz, DMSO-d<sub>6</sub>)  $\delta$  (ppm): 8.72 (d,  $J = 4.8$  Hz, 1H), 8.08 (t,  $J = 8.0$  Hz, 1H), 7.97 (m, 3H), 7.68 (m, 2H), 7.55 (d,  $J = 8.0$  Hz, 2H).

<sup>13</sup>C NMR (100 MHz, DMSO-d<sub>6</sub>)  $\delta$  (ppm): 148.47, 137.57, 132.89, 130.48, 128.11, 126.63, 124.09.

GC-MS: calc. for **7j**: 155.0; found: 155.0.

### n-(Pphenyl)toluene, **8a**

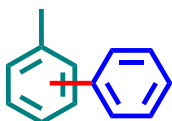

After completion of the reaction followed by quenching with water, product was extracted in 30 mL ethyl acetate and then dried over anhydrous sodium sulphate. The solvent was removed under reduced pressure. All isomeric products (ortho, meta and para) were collected together from other reaction impurities by column chromatography over silica gel (100-200 mesh) using 3% EtOAc in hexane mixture. Total yield was calculated by taking weight of obtained mixture of products. This mixture of products was subjected to NMR



and GC-MS spectroscopic characterization. Analysis of NMR data suggests the presence of three regio-isomers in the product.

#### **n-(Methylphenyl)toluene, 8b**

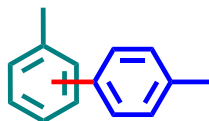

The same procedure mentioned above for **8a** was followed for the isolation of the product **8b**. Total yield was calculated by taking weight of obtained mixture of products. The mixture of product isomers was subjected to NMR and GC-MS spectroscopic characterization. Analysis of NMR data suggests the presence of three regio-isomers in the product.

#### **n-(Thiophen-2-yl)toluene, 8c**

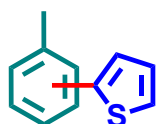

The **8c** was synthesized and isolated according to the procedures mentioned for **8a**. Total yield was calculated by taking weight of obtained mixture of products. The mixture of product isomers was subjected to NMR and GC-MS spectroscopic characterization. Analysis of NMR data suggests the presence of three regio-isomers in the product.

#### **n-(Phenyl)-m-xylene, 8d**

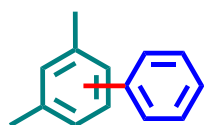

The **8d** was synthesized and isolated according to the procedures mentioned for **8a**. The purification was carried out by column chromatography over silica gel (100-200 mesh) using hexane. Total yield was calculated by taking weight of obtained mixture of products. The mixture of product isomers was subjected to NMR and GC-MS spectroscopic characterization. Analysis of NMR data suggests the presence of three regio-isomers in the product.

### n-(4-Methoxyphenyl)-m-xylene, **8e**

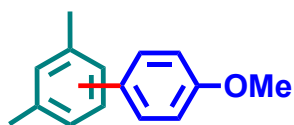

The **8e** was synthesized and isolated according to the procedures mentioned for **8a**. The purification was carried out by column chromatography over silica gel (100-200 mesh) using hexane. Total yield was calculated by taking weight of obtained mixture of products. The mixture of product isomers was subjected to NMR and GC-MS spectroscopic characterization. Analysis of NMR data suggests the presence of three regio-isomers in the product.

### n-(4-Fluorophenyl)-m-xylene, **8f**

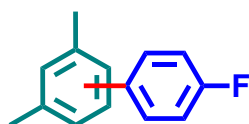

The **8e** was synthesized and isolated according to the procedures mentioned for **8a**. The purification was carried out by column chromatography over silica gel (100-200 mesh) using hexane. Total yield was calculated by taking weight of obtained mixture of products. The mixture of product isomers was subjected to NMR and GC-MS spectroscopic characterization. Analysis of NMR data suggests the presence of three regio-isomers in the product.

### 2,5-Dimethylbiphenyl, **8g**<sup>12</sup>

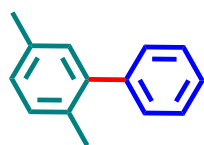

White solid. The crude product was purified by column chromatography using Merck silica gel 100-200 mesh with hexane.

<sup>1</sup>H NMR (400 MHz, DMSO-d<sub>6</sub>)  $\delta$  (ppm): 7.47 (t,  $J$  = 8.1 Hz, 1H), 7.42 (d,  $J$  = 7.2 Hz, 1H), 7.35 (m, 1H), 7.31 (d,  $J$  = 6.8 Hz, 2H), 7.16 (d,  $J$  = 7.6 Hz, 1H), 7.08 (t,  $J$  = 7.5 Hz, 1H), 7.00 (s, 1H).

<sup>13</sup>C NMR (100 MHz, DMSO-d<sub>6</sub>)  $\delta$  (ppm): 141.37, 141.02, 137.04, 134.56 (d), 131.32, 130.20 (d), 128.71 (d), 128.08 (d), 127.76, 126.69, 20.41, 19.57.

GC-MS: calc. for **8g**: 183.2; found: 183.2.

#### 4'-Methoxy-2,5-dimethyl-1,1'-biphenyl, **8h**<sup>13</sup>

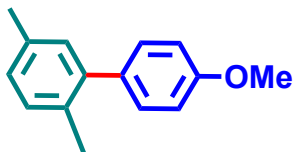

White solid. The crude product was purified by column chromatography using Merck silica gel 100-200 mesh with hexane.

**<sup>1</sup>H NMR** (400 MHz, DMSO-d<sub>6</sub>)  $\delta$  (ppm): 7.23 (d,  $J = 8.4$  Hz, 2H), 7.14 (d,  $J = 7.6$  Hz, 1H), 7.03 (d,  $J = 7.6$  Hz, 1H), 6.97 (d,  $J = 8.0$  Hz, 3H), 3.79 (s, 3H), 2.28 (s, 3H), 2.17 (s, 3H).

**<sup>13</sup>C NMR** (100 MHz, DMSO-d<sub>6</sub>)  $\delta$  (ppm): 157.98, 140.61, 134.45, 133.51, 131.31, 129.96, 129.78, 127.28, 113.40, 54.75 (d), 20.28, 19.50.

**GC-MS**: calc. for **8h**: 212.2; found: 212.2.

#### 4'-Fluoro-2,5-dimethyl-1,1'-biphenyl, **8i**<sup>13</sup>

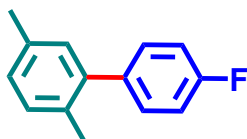

White solid. The crude product was purified by column chromatography using Merck silica gel 100-200 mesh with hexane.

**<sup>1</sup>H NMR** (400 MHz, DMSO-d<sub>6</sub>)  $\delta$  (ppm): 7.36 (m, 2H), 7.25 (d,  $J = 8.8$  Hz, 2H), 7.07 (m, 1H), 7.00 (s, 1H), 2.28 (s, 3H), 2.16 (s, 3H).

**<sup>13</sup>C NMR** (100 MHz, DMSO-d<sub>6</sub>)  $\delta$  (ppm): 162.35, 159.94, 139.96, 137.62, 127.58, 134.74, 131.44, 130.72 (d), 130.11(d), 127.91, 114.85 (d), 20.41 (d), 19.53.

**GC-MS**: calc. for **8i**: 200.2; found: 200.2.

#### 2-(2,5-Dimethylphenyl)-6-methoxynaphthalene, **8j**

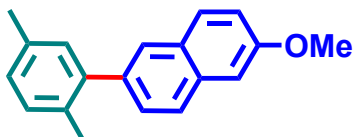

White solid. The crude product was purified by column chromatography using Merck silica gel 100-200 mesh with hexane.

**<sup>1</sup>H NMR** (400 MHz, DMSO-d<sub>6</sub>)  $\delta$  (ppm): 7.85 (m, 2H), 7.76 (s, 1H), 7.44 (d,  $J = 8.4$  Hz, 1H), 7.36 (s, 1H), 7.18 (m, 2H), 7.10 (m, 1H), 3.68 (s, 3H), 2.31 (s, 3H), 2.22 (s, 3H).

**<sup>13</sup>C NMR** (100 MHz, DMSO-d<sub>6</sub>)  $\delta$  (ppm): 157.22, 140.99, 136.50, 134.67, 132.96, 131.57, 130.16 (d), 129.32, 128.24, 127.72 (d), 127.09, 126.24, 124.48, 120.95, 118.68, 117.62, 55.11, 20.42, 19.67.

**GC-MS:** calc. for **8j**: 262.1; found: 262.1.

### 2-(2,5-Dimethylphenyl)-6-iodo-1,1'-biphenyl, **8k**

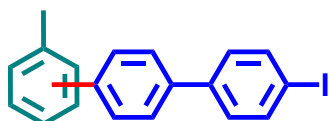

The **8k** was synthesized and isolated according to the procedures mentioned for **8a**. The purification was carried out by column chromatography over silica gel (100-200 mesh) using hexane. Total yield was calculated by taking weight of obtained mixture of products. The mixture of product isomers was subjected to NMR and GC-MS spectroscopic characterization. Analysis of NMR data suggests the presence of three regio-isomers in the product.

### 4''-iodo-2,5-dimethyl-1,1':4',1''-terphenyl, **8l**

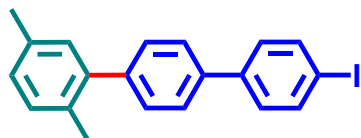

White solid. The crude product was purified by column chromatography using Merck silica gel 100-200 mesh with hexane.

**<sup>1</sup>H NMR** (400 MHz, DMSO-d<sub>6</sub>)  $\delta$  (ppm): 7.72 (d,  $J = 8.4$  Hz, 3H), 7.55-7.36 (m, 5H), 7.19 (d,  $J = 7.6$  Hz, 1H), 7.08 (m, 2H).

**<sup>13</sup>C NMR** (100 MHz, DMSO-d<sub>6</sub>)  $\delta$  (ppm): 140.53, 140.43, 139.70, 138.49, 134.77, 131.44, 130.25, 130.04, 129.44, 128.89, 128.67, 128.13, 127.89, 127.37, 126.54, 126.37.

**GC-MS:** calc. for **8l**: 384.1; found: 384.1.

### 2-phenylthiophene, **9a**<sup>10</sup>

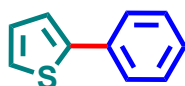

Colorless oil. The crude product was purified by column chromatography using Merck silica gel 100-200 mesh with hexane.

<sup>1</sup>H NMR (400 MHz, DMSO-d<sub>6</sub>)  $\delta$  (ppm): 7.66 (d,  $J$  = 7.6 Hz, 2H), 7.54 (dd,  $J$  = 4.8 Hz, and  $J$  = 0.8 Hz, 1H), 7.52 (d,  $J$  = 3.6 Hz, 1H), 7.42 (t,  $J$  = 8.0 Hz, 2H), 7.31 (t,  $J$  = 7.2 Hz, 1H), 7.14 (m, 1H).

<sup>13</sup>C NMR (100 MHz, DMSO-d<sub>6</sub>)  $\delta$  (ppm): 143.22, 113.64, 129.01, 128.77, 128.38, 127.45, 125.56, 125.30, 123.58.

GC-MS: calc. for **9a**: 160.1; found: 160.1.

### 2-(4-Methylphenyl)thiophene, **9b**<sup>14</sup>

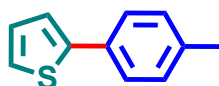

White solid. The crude product was purified by column chromatography using Merck silica gel 100-200 mesh with hexane.

<sup>1</sup>H NMR (400 MHz, DMSO-d<sub>6</sub>)  $\delta$  (ppm): 7.54 (d,  $J$  = 8.0 Hz, 2H), 7.49 (d,  $J$  = 4.8 Hz, 1H), 7.45 (d,  $J$  = 2.0 Hz, 1H), 7.22 (d,  $J$  = 7.6 Hz, 2H), 7.11 (t,  $J$  = 4.8 Hz, 1H), 2.31 (s, 3H).

<sup>13</sup>C NMR (100 MHz, DMSO-d<sub>6</sub>)  $\delta$  (ppm): 143.22, 113.64, 129.01, 128.77, 128.38, 127.45, 125.56, 125.30, 123.58.

GC-MS: calc. for **9b**: 174.2; found: 174.2.

### 2-(4-Methoxyphenyl)thiophene, **9c**<sup>15</sup>

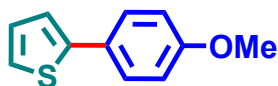

White solid. The crude product was purified by column chromatography using Merck silica gel 100-200 mesh with hexane. The product contain small amount of another region isomer.

<sup>1</sup>H NMR (400 MHz, DMSO-d<sub>6</sub>)  $\delta$  (ppm): 7.59 (d,  $J$  = 8.0 Hz, 2H), 7.44 (d,  $J$  = 4.8 Hz, 1H), 7.36 (d,  $J$  = 3.6 Hz, 1H), 7.09 (t,  $J$  = 4.0 Hz, 1H), 6.97 (d,  $J$  = 8.8 Hz, 1H), 3.74 (s, 3H).

$^{13}\text{C}$  NMR (100 MHz, DMSO- $d_6$ )  $\delta$ (ppm): 158.71, 143.19, 128.15, 127.08, 126.59, 124.26, 122.28, 114.33, 54.96.

GC-MS: calc. for **9c**: 190.2; found: 190.2.

#### 2-(4-Fluorophenyl)thiophene, **9d**<sup>16</sup>

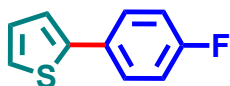

White solid. The crude product was purified by column chromatography using Merck silica gel 100-200 mesh with hexane.

$^1\text{H}$  NMR (400 MHz, DMSO- $d_6$ )  $\delta$ (ppm): 7.69 (t,  $J = 5.6$  Hz, 2H), 7.54 (d,  $J = 3.2$  Hz, 1H), 7.48 (d,  $J = 2.8$  Hz, 1H), 7.25 (t,  $J = 8.4$  Hz, 2H), 7.13 (t,  $J = 3.6$  Hz, 1H).

$^{13}\text{C}$  NMR (100 MHz, DMSO- $d_6$ )  $\delta$ (ppm): 162.72, 160.28, 142.07, 130.30 (d), 128.45, 127.34 (d), 125.63, 123.77, 116.01, 115.79.

GC-MS: calc. for **9d**: 178.0; found: 178.0.

#### n-[4-(Trifluoromethyl)phenyl]thiophene, **9e**

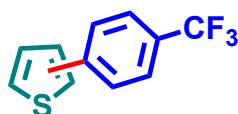

The **9e** was synthesized and isolated according to the procedures mentioned for **8a**. The purification was carried out by column chromatography over silica gel (100-200 mesh) using hexane. Total yield was calculated by taking weight of obtained mixture of products. The mixture of product isomers was subjected to NMR and GC-MS spectroscopic characterization. Analysis of NMR data suggests the presence of two regio-isomers, 2-[4-(Trifluoromethyl)phenyl]thiophene and 3-[4-(Trifluoromethyl)phenyl]thiophene in the product.

#### 2-[1,1'-Biphenyl]-4-ylthiophene, **9f**<sup>17</sup>

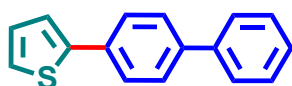

White solid. The crude product was purified by column chromatography using Merck silica gel 100-200 mesh with hexane.

$^1\text{H}$  NMR (400 MHz, DMSO- $d_6$ )  $\delta$ (ppm): 7.77-7.70 (m, 6H), 7.58 (m, 2H), 7.48 (t,  $J = 8.0$  Hz, 2H), 7.38 (t,  $J = 7.6$  Hz, 1H), 7.17 (t,  $J = 7.2$  Hz, 1H).

$^{13}\text{C}$  NMR (100 MHz, DMSO- $d_6$ )  $\delta$  (ppm): 142.81, 139.30, 139.04, 132.78, 128.92, 128.54, 127.51, 127.22, 126.38, 125.83, 125.74, 123.75.

GC-MS: calc. for **9e**: 236.2; found: 236.2.

### n-Phenylpyridine, **9g**<sup>18</sup>

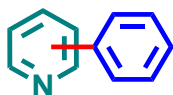

White solid. The crude product was purified by column chromatography using Merck silica gel 100-200 mesh with hexane. Two isomers are formed in our catalytic condition and isolated them separately during the column purification. Both isomers were subjected to NMR and GC-MS spectroscopic characterization.

**2-Phenylpyridine:** Yield 42%.

$^1\text{H}$  NMR (400 MHz, DMSO- $d_6$ )  $\delta$  (ppm): 8.67 (d,  $J = 5.2$  Hz, 1H), 8.08 (d,  $J = 7.6$  Hz, 2H), 7.96 (d,  $J = 8.0$  Hz, 1H), 7.87 (t,  $J = 7.6$  Hz, 1H), 7.49 (t,  $J = 7.2$  Hz, 2H), 7.43 (t,  $J = 6.8$  Hz, 1H), 7.35 (t,  $J = 4.8$  Hz, 1H).

$^{13}\text{C}$  NMR (100 MHz, DMSO- $d_6$ )  $\delta$  (ppm): 155.88, 149.44, 138.58, 137.13, 128.93, 128.64, 126.40, 122.50, 120.12.

GC-MS: calc. for **9f**: 155.1; found: 155.2.

**3-Phenylpyridine:** Yield 47%.

$^1\text{H}$  NMR (400 MHz, DMSO- $d_6$ )  $\delta$  (ppm): 8.89 (s, 1H), 8.57 (d,  $J = 4.4$  Hz, 1H), 8.07 (d,  $J = 8.0$  Hz, 1H), 7.23 (d,  $J = 7.6$  Hz, 2H), 7.50 (q,  $J = 7.6$  Hz, 3H), 7.43 (t,  $J = 7.2$  Hz, 1H).

$^{13}\text{C}$  NMR (100 MHz, DMSO- $d_6$ )  $\delta$  (ppm): 148.38, 147.56, 136.98, 135.45, 134.00, 129.02, 128.02, 126.78, 123.75.

GC-MS: calc. for **9f**: 155.1; found: 155.1.

### n-(4-Methoxyphenyl)pyridine, **9h**<sup>19</sup>

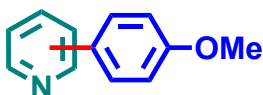

White solid. The crude product was purified by column chromatography using Merck silica gel 100-200 mesh with hexane. Two isomers are formed in our catalytic condition and isolated them separately during the column purification. Both isomers were subjected to NMR and GC-MS spectroscopic characterization.

**2-(4-Methoxyphenyl)pyridine:** Yield 40%.

<sup>1</sup>H NMR (400 MHz, DMSO-d<sub>6</sub>)  $\delta$  (ppm): 8.60 (d,  $J = 4.4$  Hz, 1H), 8.04 (d,  $J = 8.8$  Hz, 2H), 7.88 (d,  $J = 8.0$  Hz, 1H), 7.81 (t,  $J = 7.6$  Hz, 1H), 7.27 (t,  $J = 6.0$  Hz, 1H), 7.04 (d,  $J = 8.8$  Hz, 2H), 3.81 (s, 3H).

<sup>13</sup>C NMR (100 MHz, DMSO-d<sub>6</sub>)  $\delta$  (ppm): 160.00, 155.64, 149.21, 136.90, 131.04, 127.68, 121.60, 119.21, 113.97, 55.07.

GC-MS: calc. for **9g**: 185.2; found: 185.2.

**3-(4-Methoxyphenyl)pyridine:** Yield 45%.

<sup>1</sup>H NMR (400 MHz, DMSO-d<sub>6</sub>)  $\delta$  (ppm): 8.51 (d,  $J = 1.2$  Hz, 1H), 8.51 (d,  $J = 2.0$  Hz, 1H), 8.01 (d,  $J = 8.0$  Hz, 1H), 7.68 (d,  $J = 8.8$  Hz, 2H), 7.44 (q,  $J = 4.4$  Hz, 1H), 7.06 (d,  $J = 8.8$  Hz, 2H), 3.81 (s, 3H).

<sup>13</sup>C NMR (100 MHz, DMSO-d<sub>6</sub>)  $\delta$  (ppm): 159.32, 147.66, 147.13, 135.11, 133.38, 129.21, 127.93, 123.68, 114.50, 55.13.

GC-MS: calc. for **9g**: 185.2; found: 185.2.

**n-(4-Fluorophenyl)pyridine, 9i<sup>20</sup>**

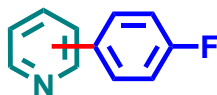

White solid. The crude product was purified by column chromatography using Merck silica gel 100-200 mesh with hexane. Two isomers are formed in our catalytic condition and isolated them separately during the column purification. Both isomers were subjected to NMR and GC-MS spectroscopic characterization.

**2-(4-Fluorophenyl)pyridine:** Yield 43%.

<sup>1</sup>H NMR (400 MHz, DMSO-d<sub>6</sub>)  $\delta$  (ppm): 8.65 (d,  $J = 4.4$  Hz, 1H), 8.42 (t,  $J = 6.0$  Hz, 2H), 7.95 (d,  $J = 8.0$  Hz, 1H), 7.88 (t,  $J = 7.6$  Hz, 1H), 7.33 (m, 3H).

<sup>13</sup>C NMR (100 MHz, DMSO-d<sub>6</sub>)  $\delta$  (ppm): 163.98, 161.53, 154.86, 149.43, 137.20, 128.56 (d), 122.44, 119.96, 115.48 (d).

GC-MS: calc. for **9h**: 173.2; found: 173.2.

**3-(4-Fluorophenyl)pyridine:** Yield 46%.

<sup>1</sup>H NMR (400 MHz, DMSO-d<sub>6</sub>)  $\delta$  (ppm): 8.88 (s, 1H), 8.56 (d,  $J = 4.8$  Hz, 1H), 8.06 (d,  $J = 8.0$  Hz, 1H), 7.78 (t,  $J = 5.2$  Hz, 2H), 7.48 (m, 1H), 7.34 (t,  $J = 8.8$  Hz, 2H).



$^{13}\text{C}$  NMR (100 MHz, DMSO- $d_6$ )  $\delta$  (ppm): 163.36, 160.93, 148.30, 147.44, 134.44, 133.90, 133.42 (d), 128.84 (d), 123.66, 115.92, 115.71.

GC-MS: calc. for 9h: 173.2; found: 173.2.

#### 2-(4-(Trifluoromethyl)phenyl)pyridine, 9j<sup>21</sup>

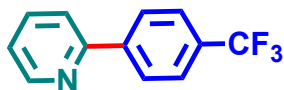

White solid. The crude product was purified by column chromatography using Merck silica gel 100-200 mesh with hexane/EtOAc (20:1).

$^1\text{H}$  NMR (400 MHz, DMSO- $d_6$ )  $\delta$  (ppm): 8.72 (s, 1H), 8.31 (d,  $J = 8.0$  Hz, 2H), 8.09 (d,  $J = 7.8$  Hz, 1H), 7.95 (t,  $J = 6.0$  Hz, 1H), 7.86 (d,  $J = 7.6$  Hz, 2H), 7.45 (t,  $J = 7.6$  Hz, 1H).

$^{13}\text{C}$  NMR (100 MHz, DMSO- $d_6$ )  $\delta$  (ppm): 154.25, 149.71, 142.38, 137.45, 127.15, 125.58, 125.54, 123.49, 120.88.

GC-MS: calc. for 9j: 223.1; found: 223.1.

#### 2,3'-Bipyridine, 9k<sup>22</sup>

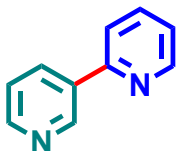

White solid. The crude product was purified by column chromatography using Merck silica gel 100-200 mesh with hexane.

$^1\text{H}$  NMR (400 MHz, DMSO- $d_6$ )  $\delta$  (ppm): 8.72 (d,  $J = 8.0$  Hz, 1H), 8.07 (td,  $J = 7.6$  Hz and  $J = 1.2$  Hz, 1H), 8.01-7.95 (m, 2H), 7.68 (m, 2H), 7.55 (t,  $J = 7.6$  Hz, 2H).

$^{13}\text{C}$  NMR (100 MHz, DMSO- $d_6$ )  $\delta$  (ppm): 154.51, 148.50, 137.61, 135.91, 132.93, 130.52, 128.15, 126.67, 124.08.

GC-MS: calc. for 9i: 156.1; found: 156.1.

#### 4-(2-Thienyl)pyridine, 9l<sup>23</sup>

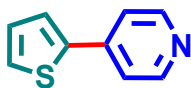

White solid. The crude product was purified by column chromatography using Merck silica gel 100-200 mesh with hexane.

$^1\text{H}$  NMR (400 MHz, DMSO- $d_6$ )  $\delta$  (ppm): 8.57 (m, 2H), 7.81 (d,  $J = 2.8$  Hz, 1H), 7.75 (d,  $J = 5.2$  Hz, 1H), 7.65 (m, 2H), 7.22 (t,  $J = 4.0$  Hz, 1H).

$^{13}\text{C}$  NMR (100 MHz, DMSO- $d_6$ )  $\delta$  (ppm): 150.26, 140.41, 140.15, 128.77, 128.17, 127.07 (d), 126.34, 119.39.

GC-MS: calc. for **9j**: 161.1; found: 161.1.

### 2,2'-Bithiophene, **9m**<sup>24</sup>

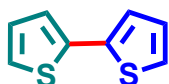

Colorless liquid. The crude product was purified by column chromatography using Merck silica gel 100-200 mesh with hexane.

$^1\text{H}$  NMR (400 MHz, DMSO- $d_6$ )  $\delta$  (ppm): 7.49 (d,  $J = 5.2$  Hz, 2H), 7.29 (d,  $J = 3.2$  Hz, 2H), 7.08 (t,  $J = 4.8$  Hz, 2H).

$^{13}\text{C}$  NMR (100 MHz, DMSO- $d_6$ )  $\delta$  (ppm): 136.38, 128.15, 125.18, 123.88.

GC-MS: calc. for **9k**: 166.0; found: 166.0.

## 6. $^1\text{H}$ NMR and $^{13}\text{C}$ NMR spectra of the products:

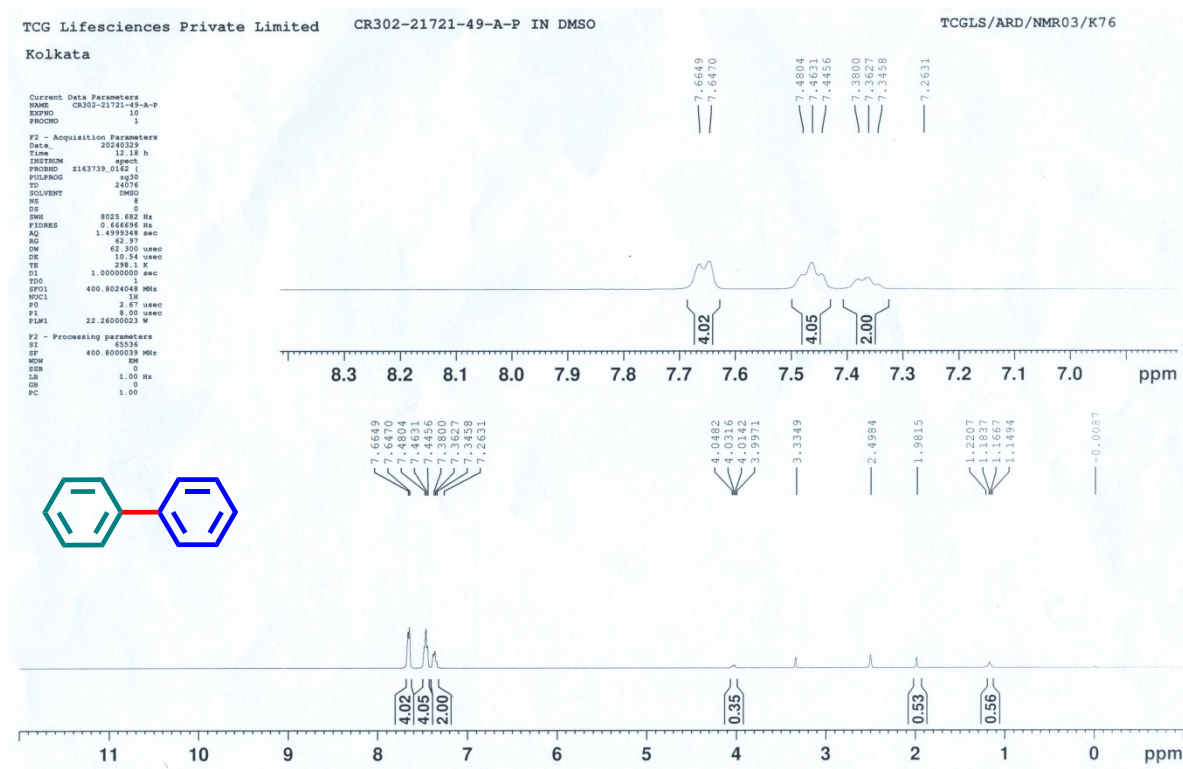

Figure S6:  $^1\text{H}$  NMR spectrum of **7a**.



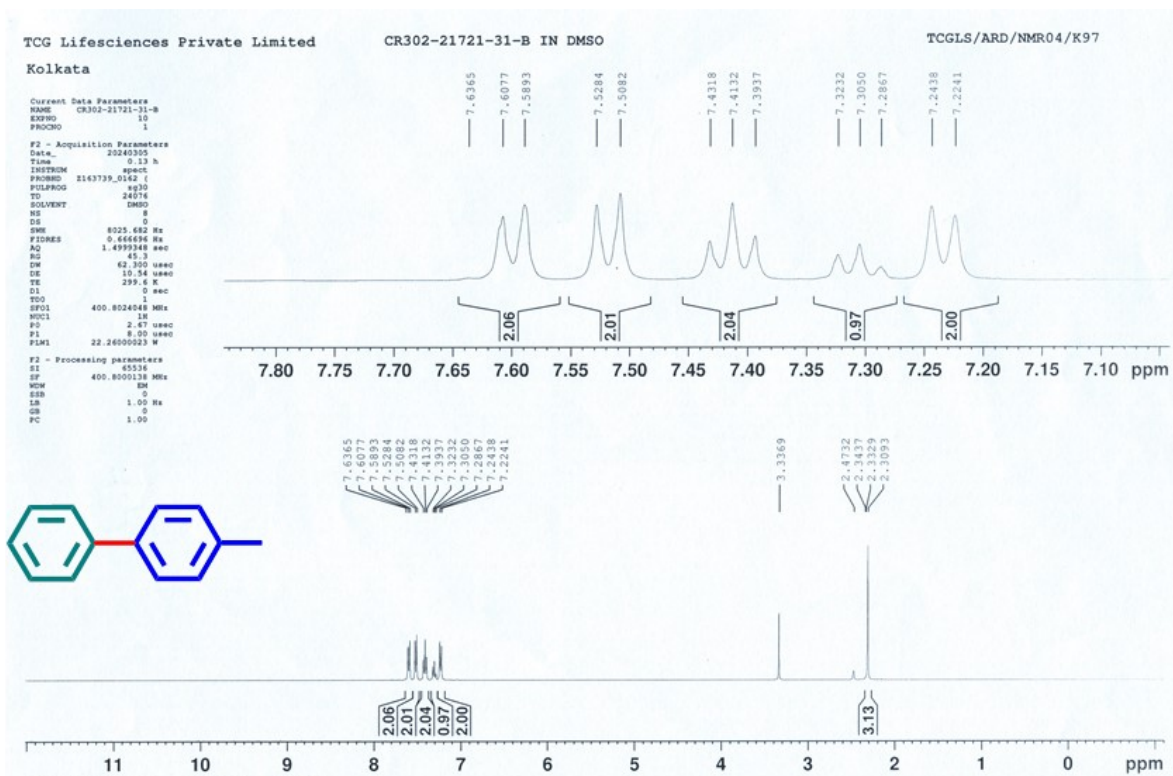

Figure S9:  $^1\text{H}$  NMR spectrum of 7b.

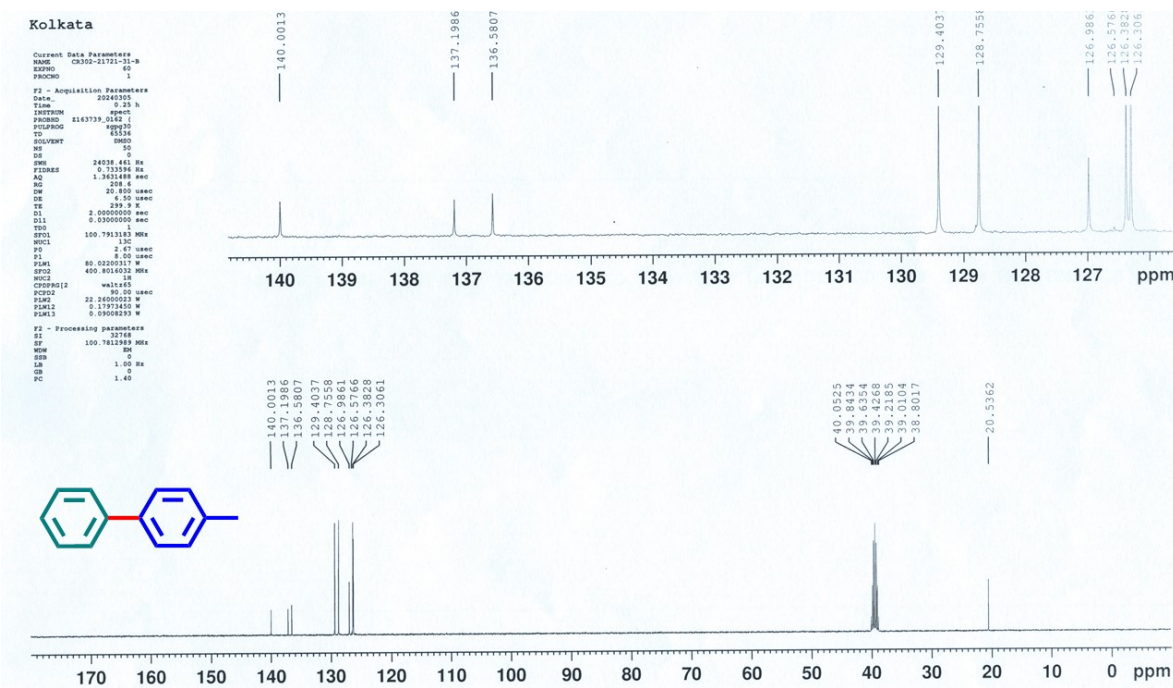

Figure S10:  $^{13}\text{C}$   $\{^1\text{H}\}$  NMR spectrum of 7b.



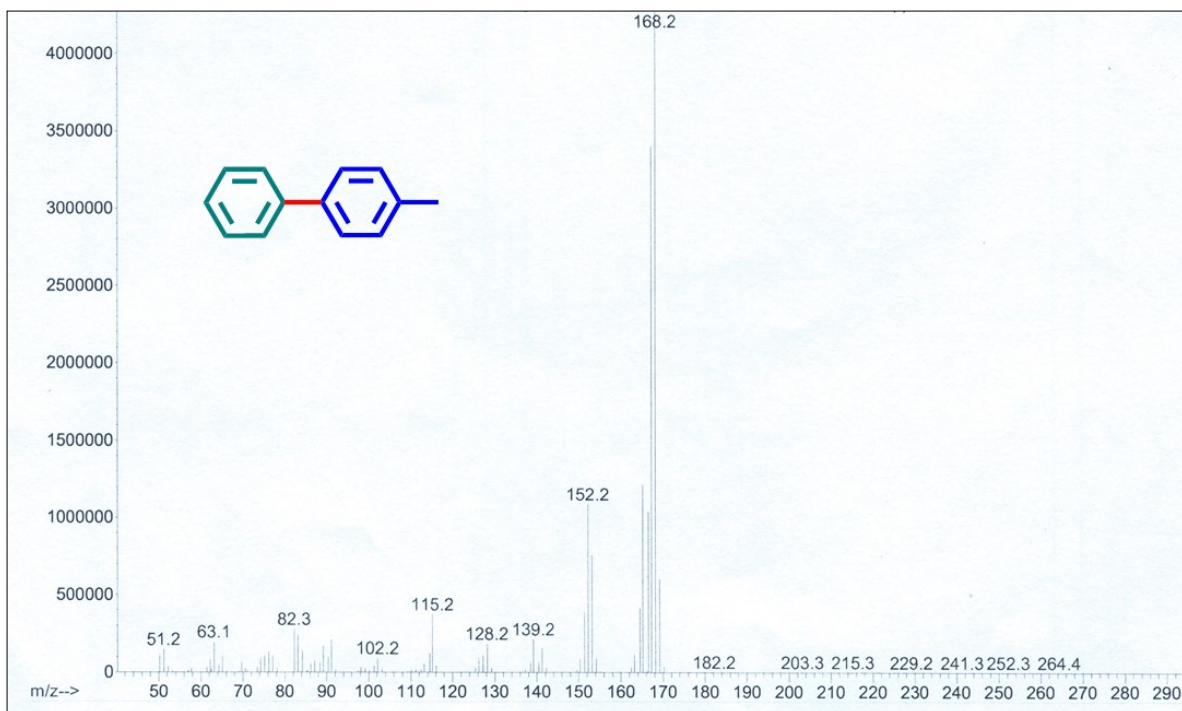

Figure S11: GC-MS spectrum of 7b.

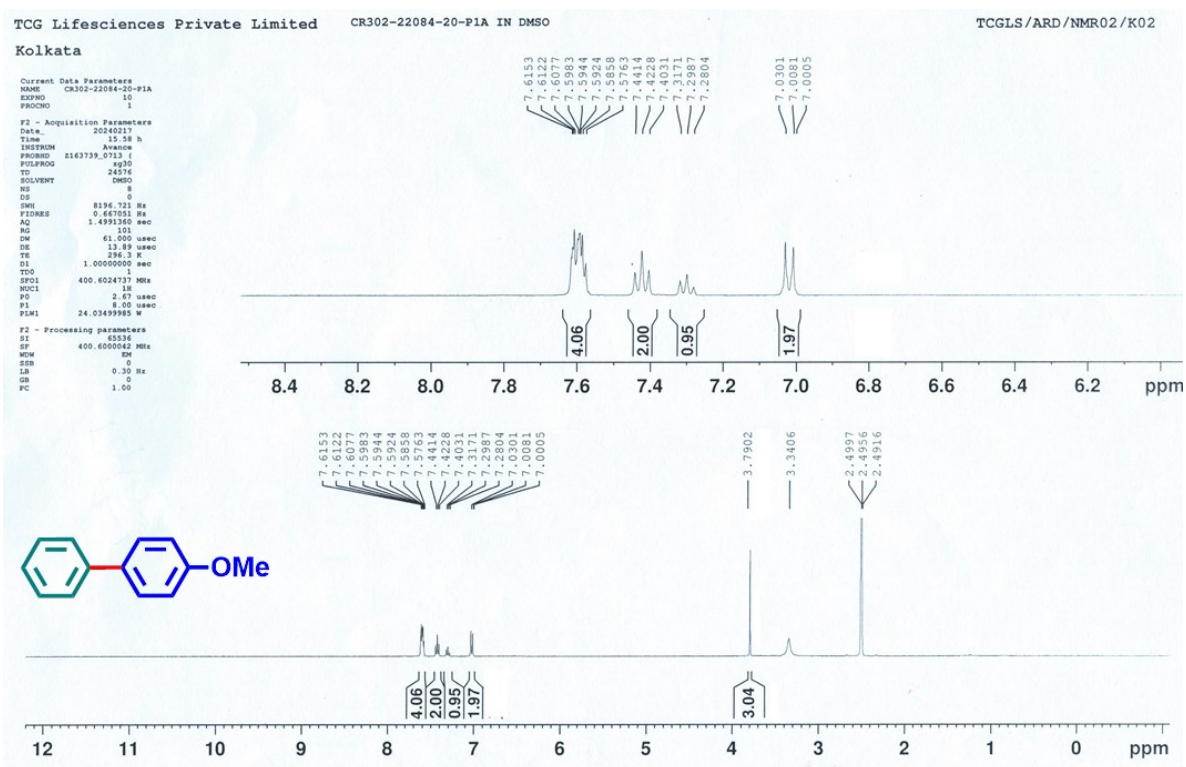

Figure S12: <sup>1</sup>H NMR spectrum of 7c.





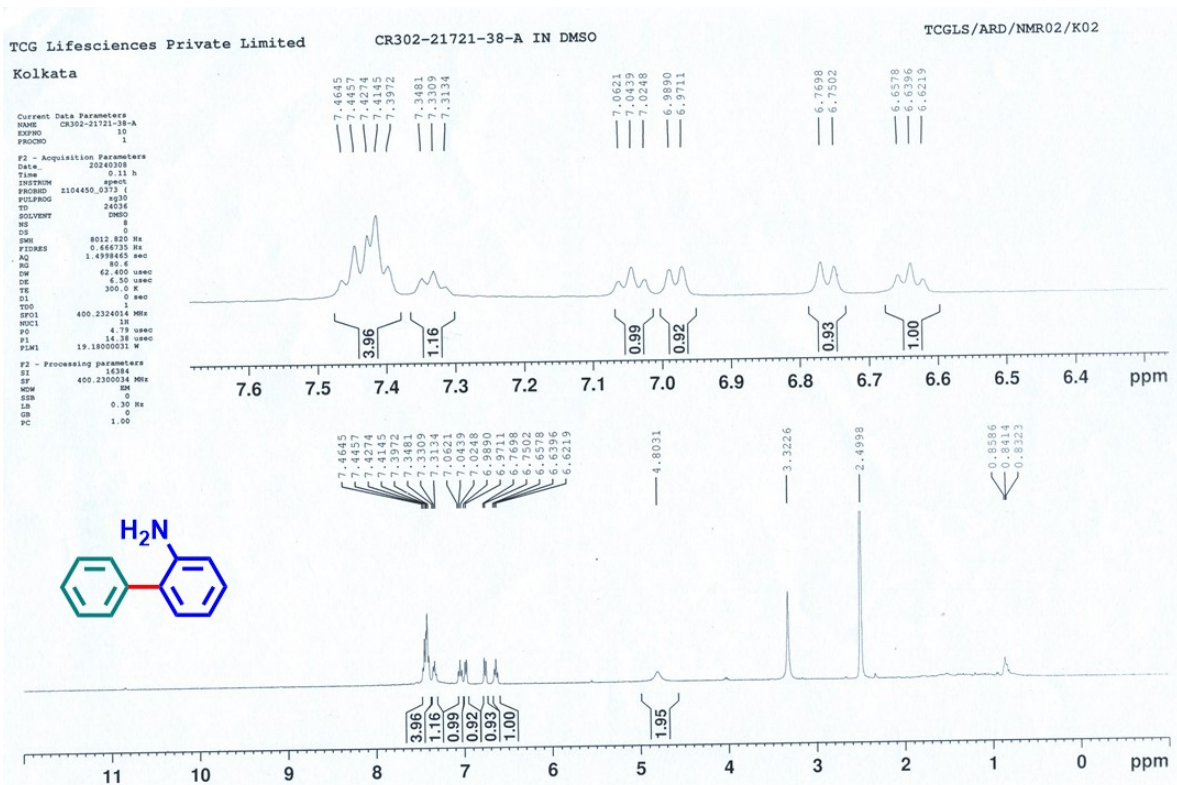

Figure S15:  $^1\text{H}$  NMR spectrum of 7d.

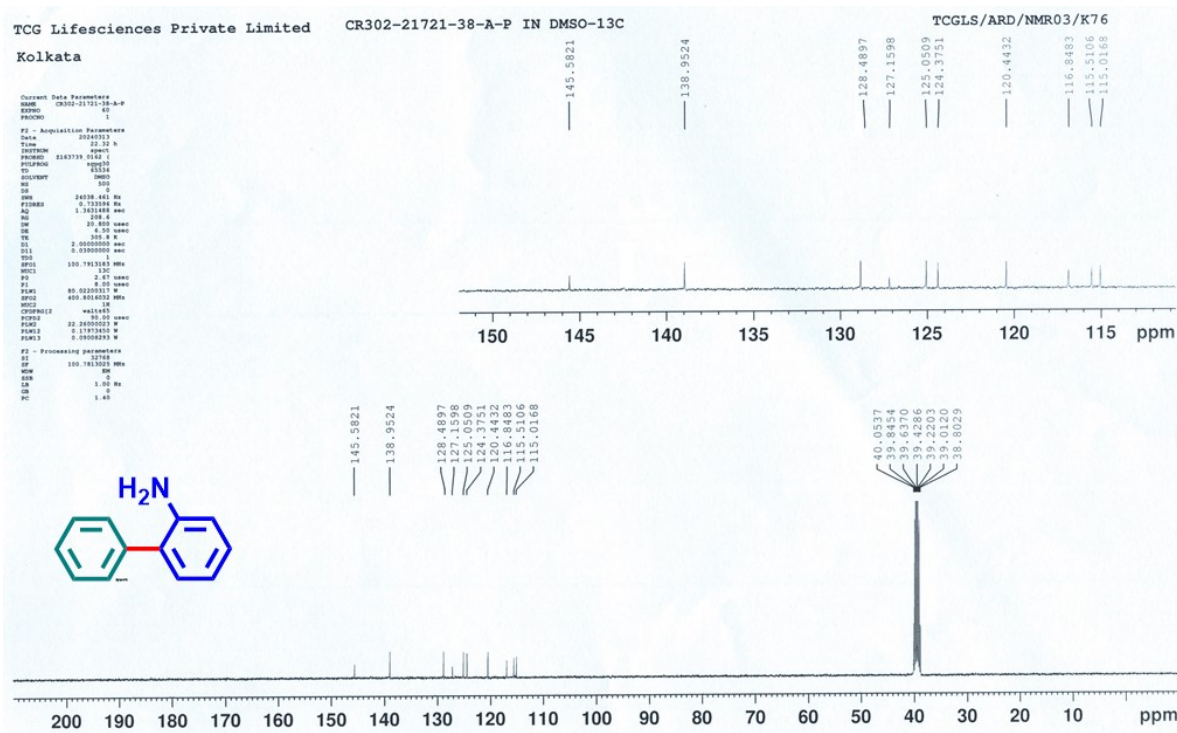

Figure S16:  $^{13}\text{C}$   $\{^1\text{H}\}$  NMR spectrum of 7d.







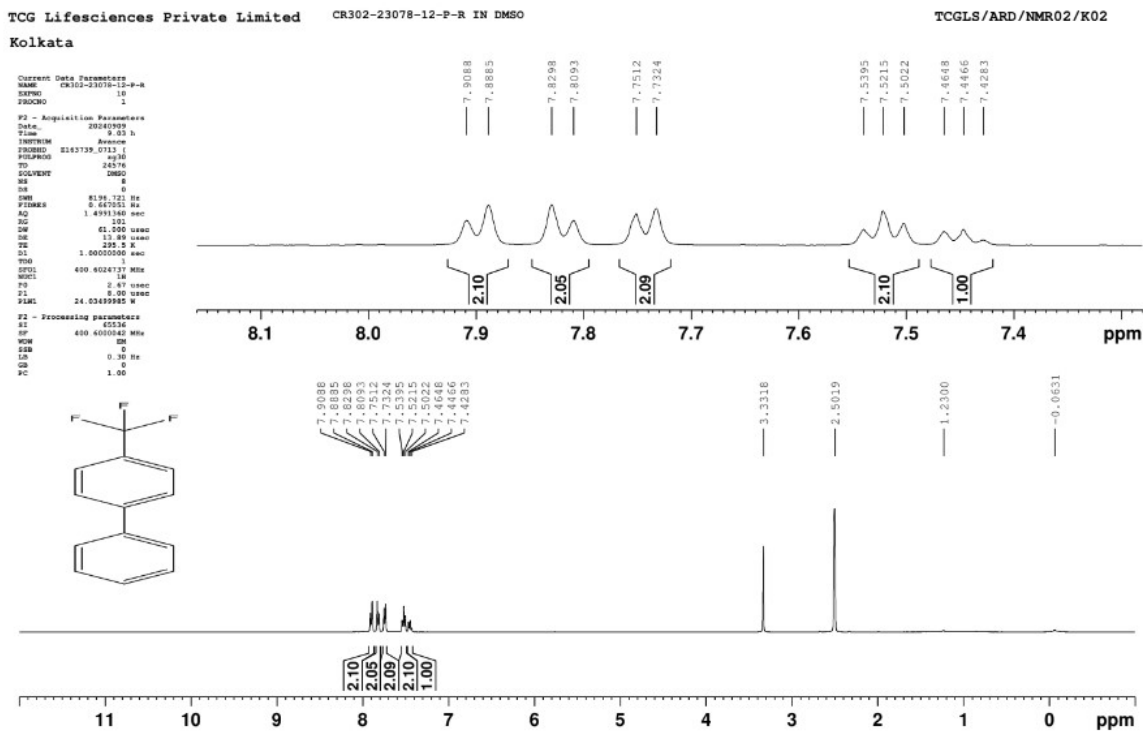

Figure S21:  $^1\text{H}$  NMR spectrum of **7f**.

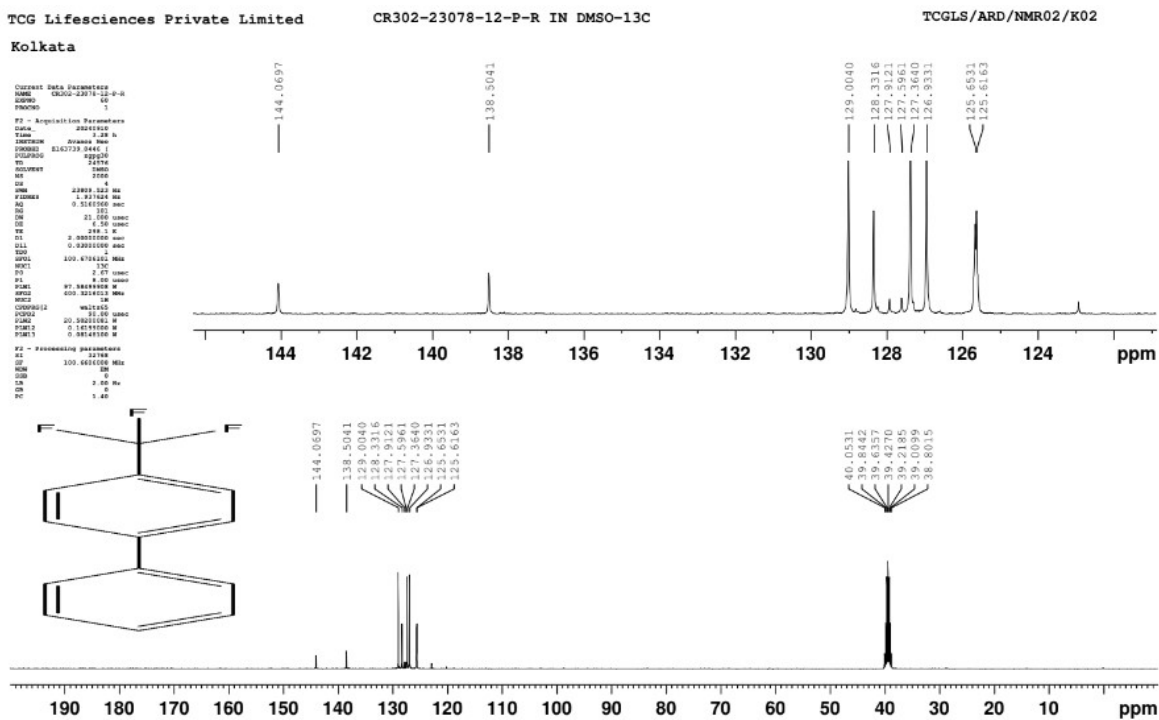

Figure S22:  $^{13}\text{C}$   $\{^1\text{H}\}$  NMR spectrum of **7f**.

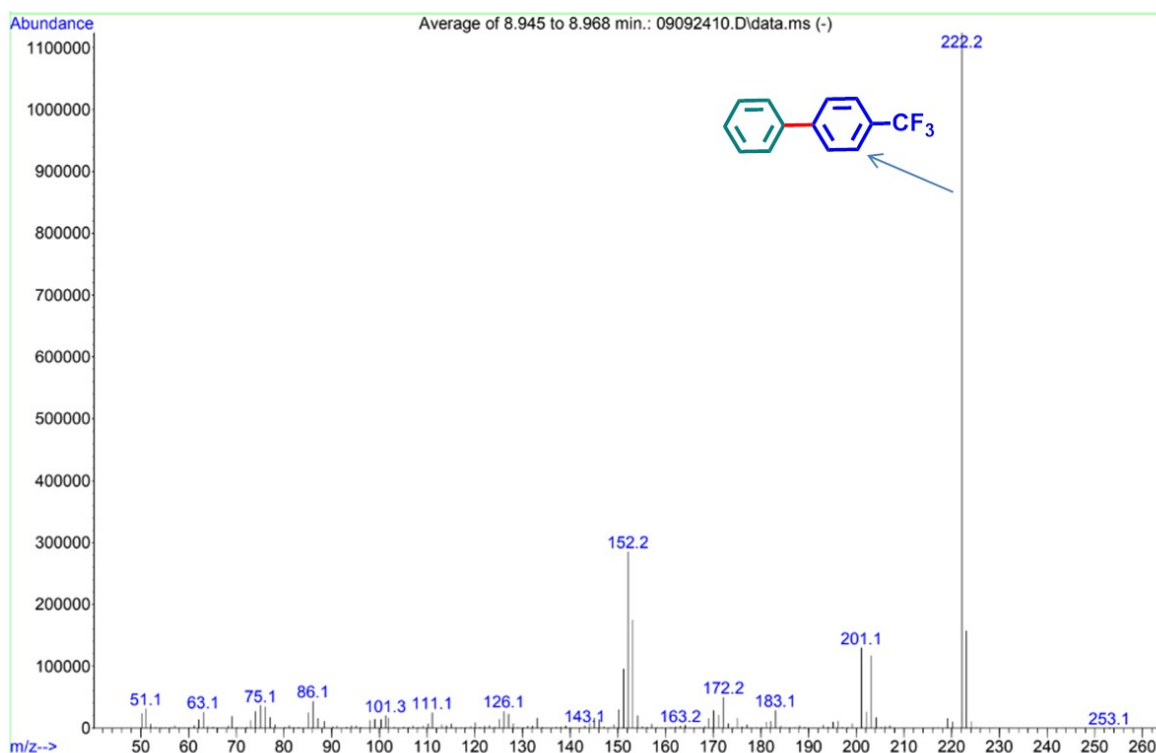

Figure S23: GC-MS spectrum of 7f.

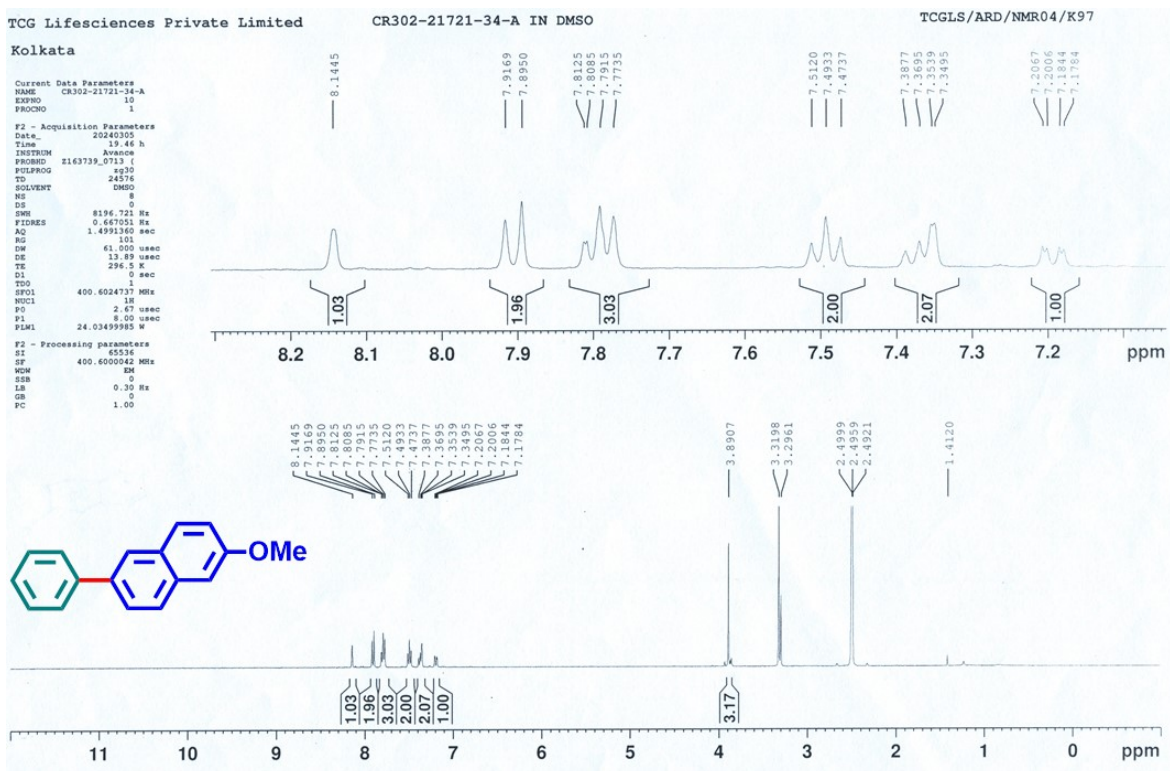

Figure S24: <sup>1</sup>H NMR spectrum of 7g.

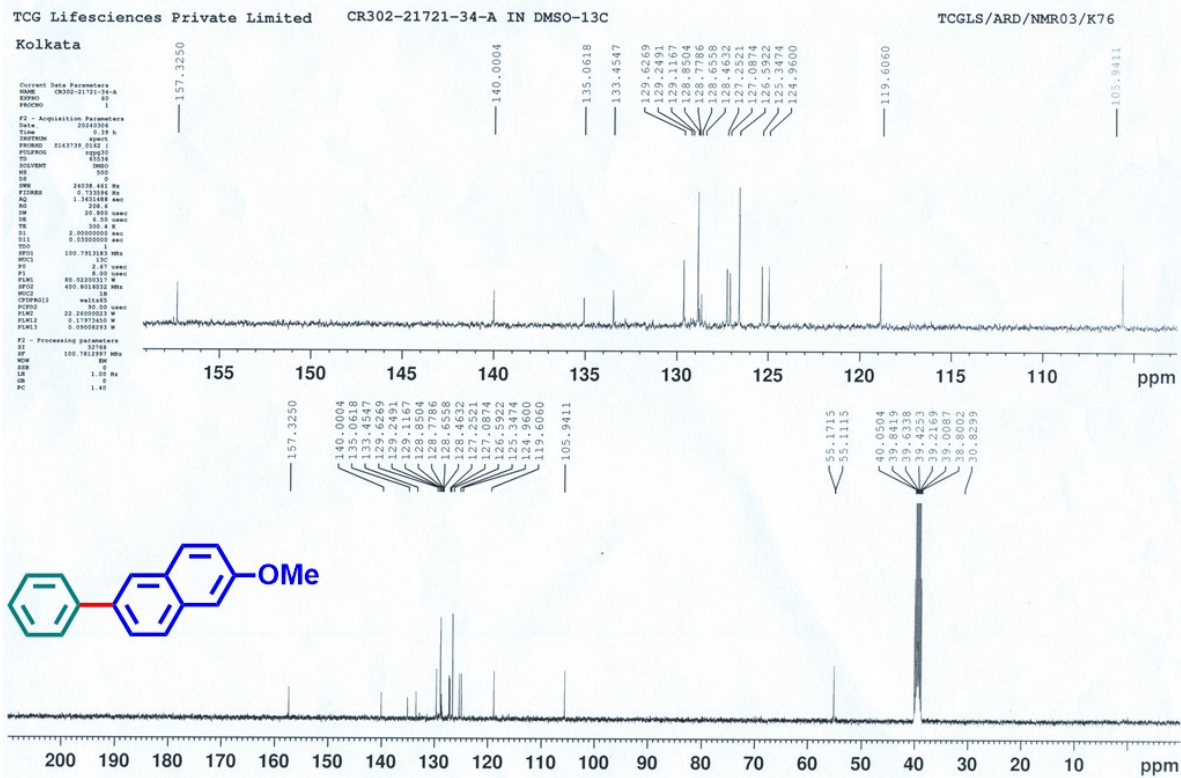

Figure S25:  $^{13}\text{C}$   $\{^1\text{H}\}$  NMR spectrum of 7g.

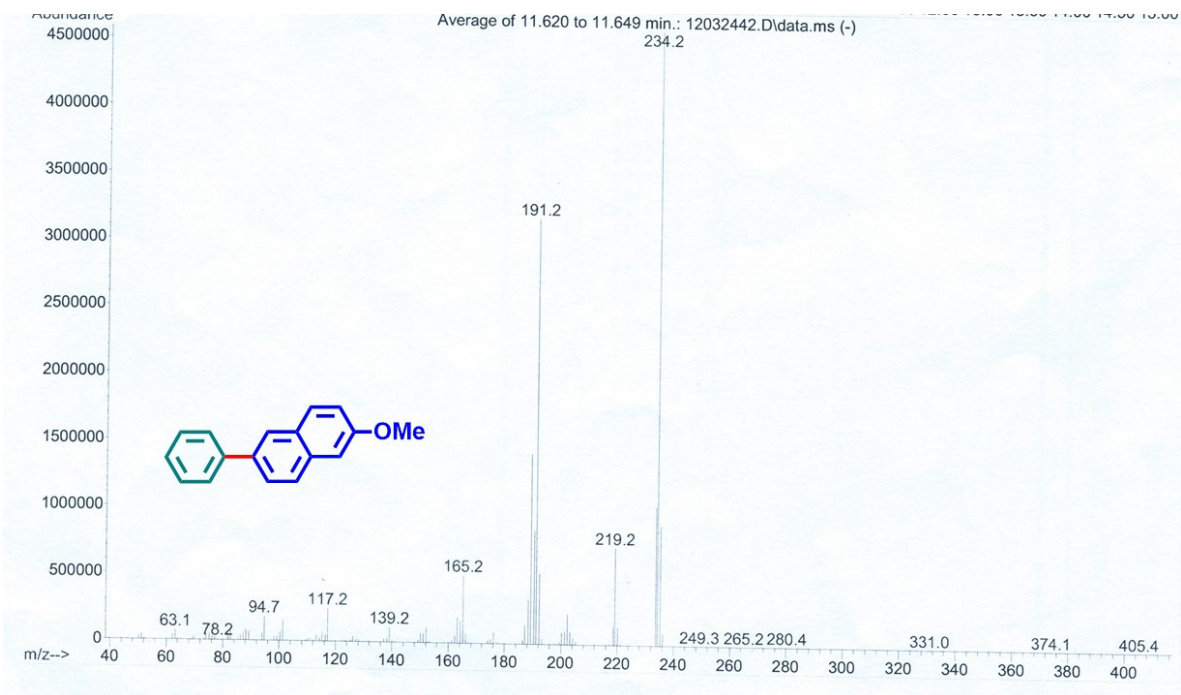

Figure S26: GC-MS spectrum of 7g.



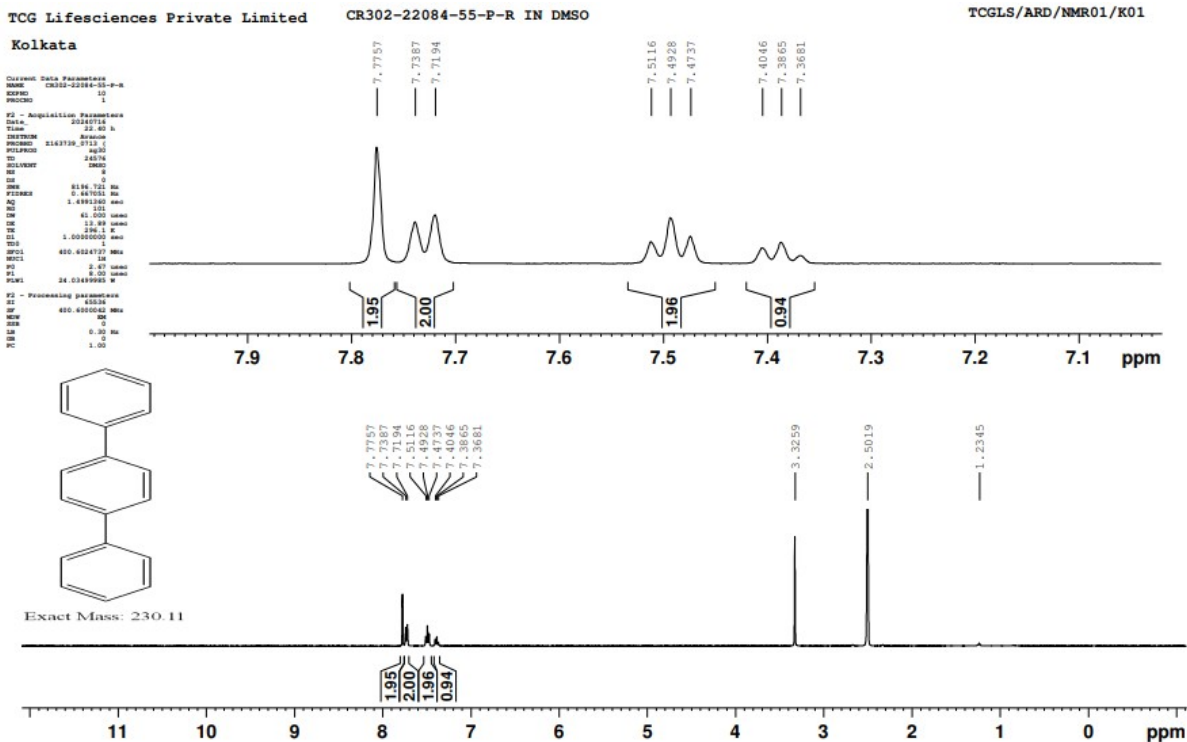

Figure S27:  $^1\text{H}$  NMR spectrum of 7h.

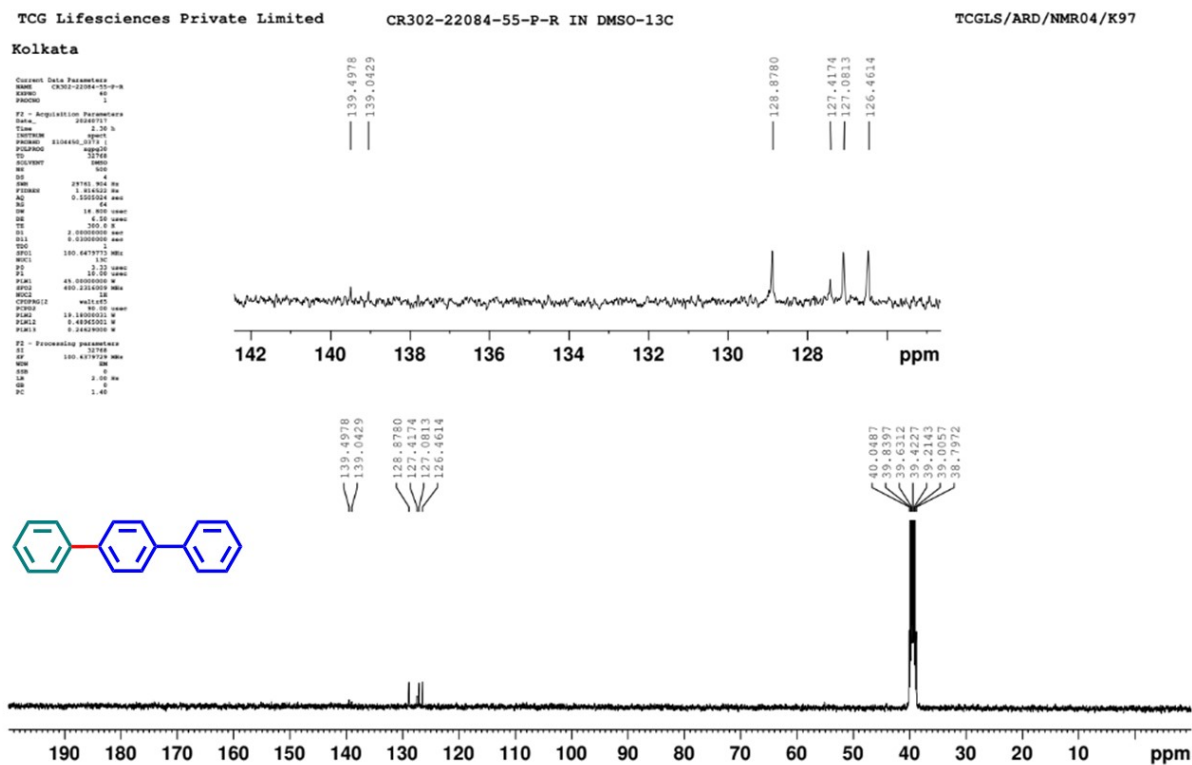

Figure S28:  $^{13}\text{C}$   $\{^1\text{H}\}$  NMR spectrum of 7h.

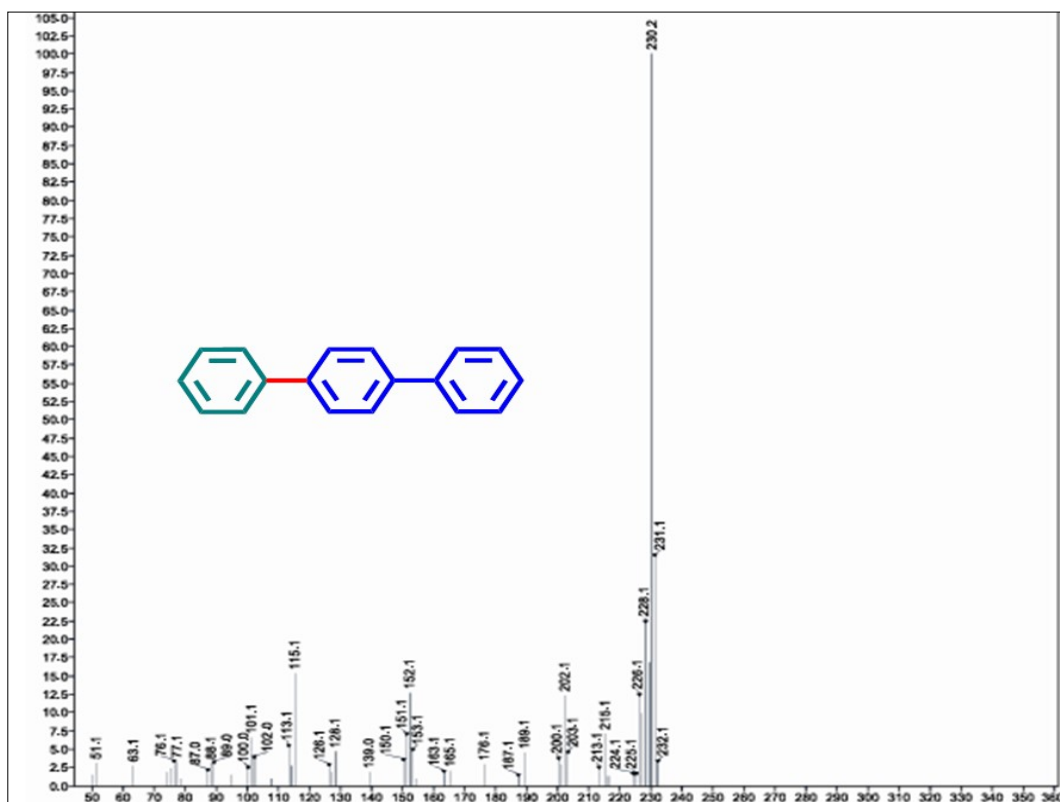

Figure S29: GC-MS spectrum of 7h.

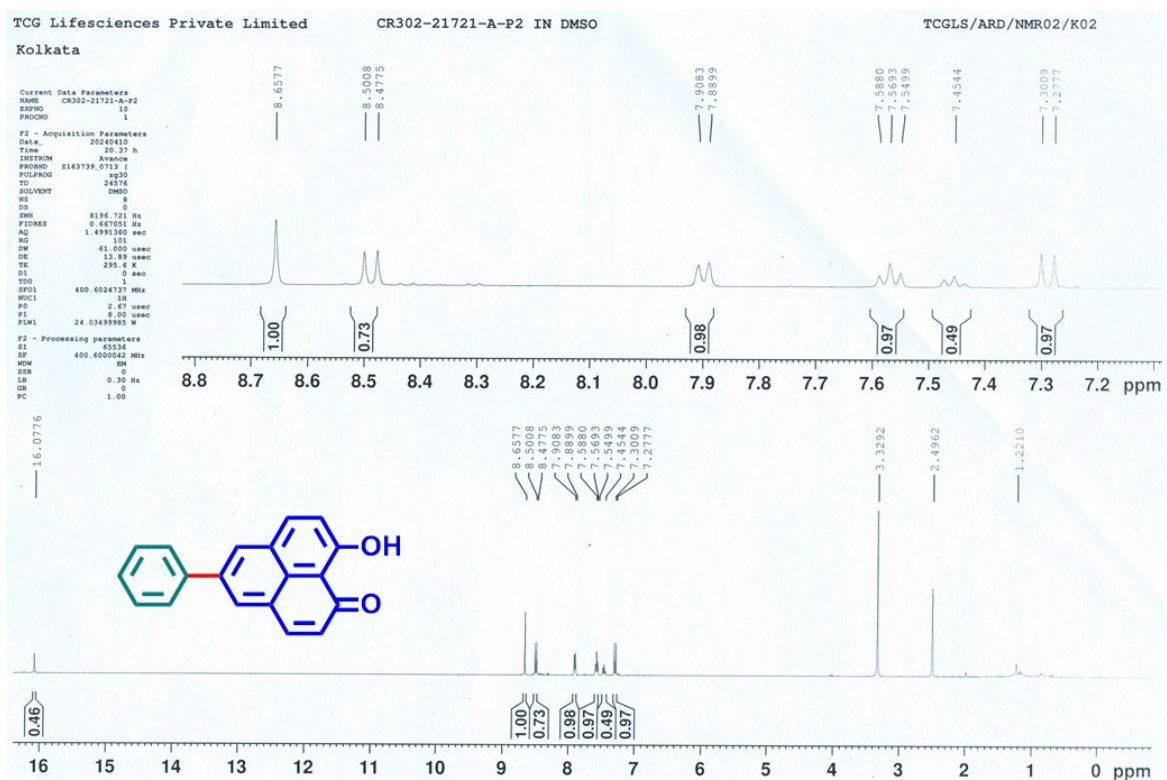

Figure S30:  $^1\text{H}$  NMR spectrum of 7i.





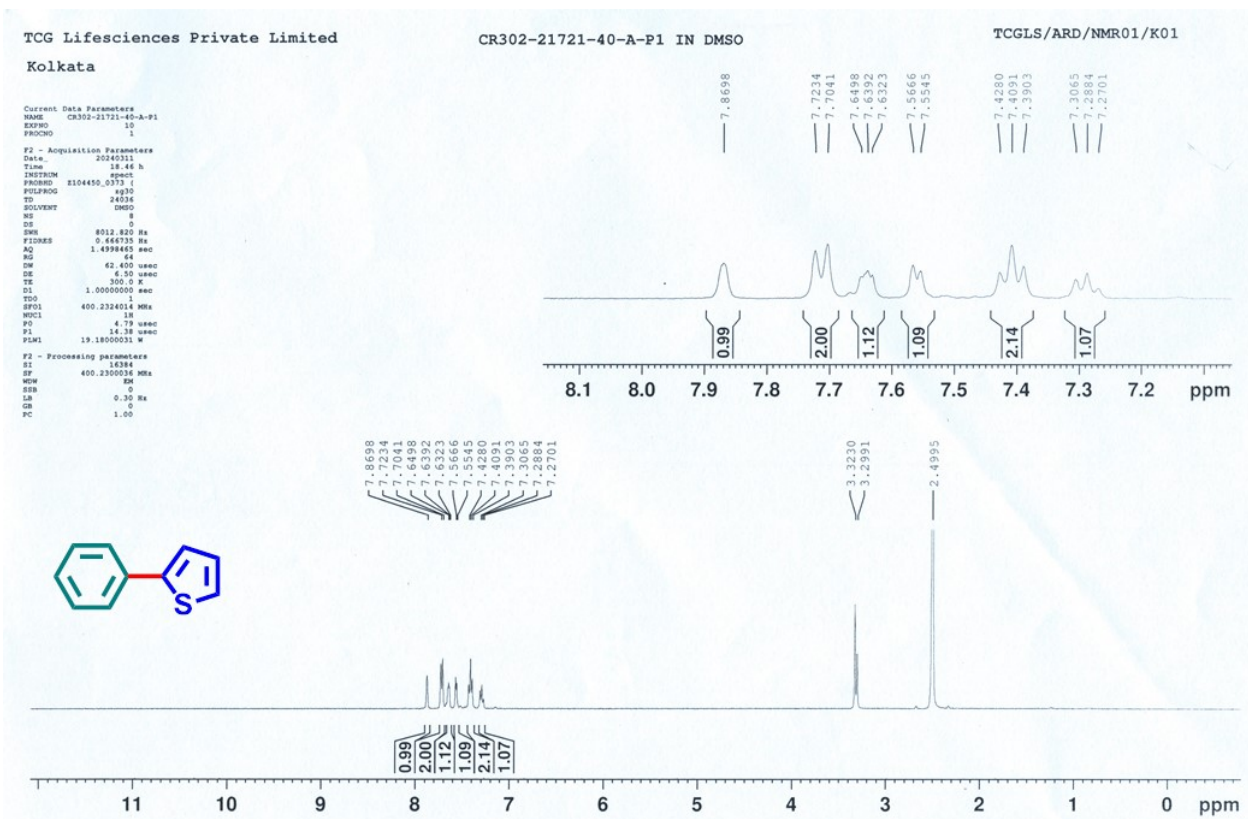

Figure S33:  $^1\text{H}$  NMR spectrum of 7j.

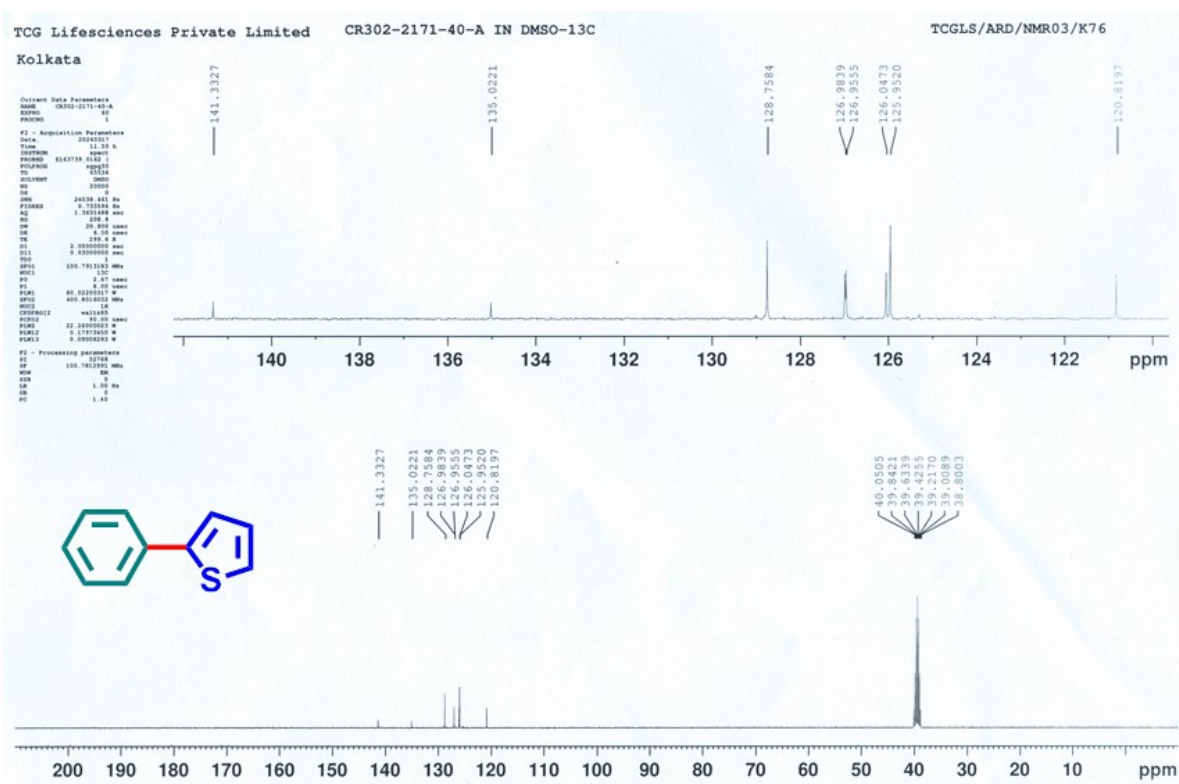

Figure S34:  $^{13}\text{C}$   $\{^1\text{H}\}$  NMR spectrum of 7j.



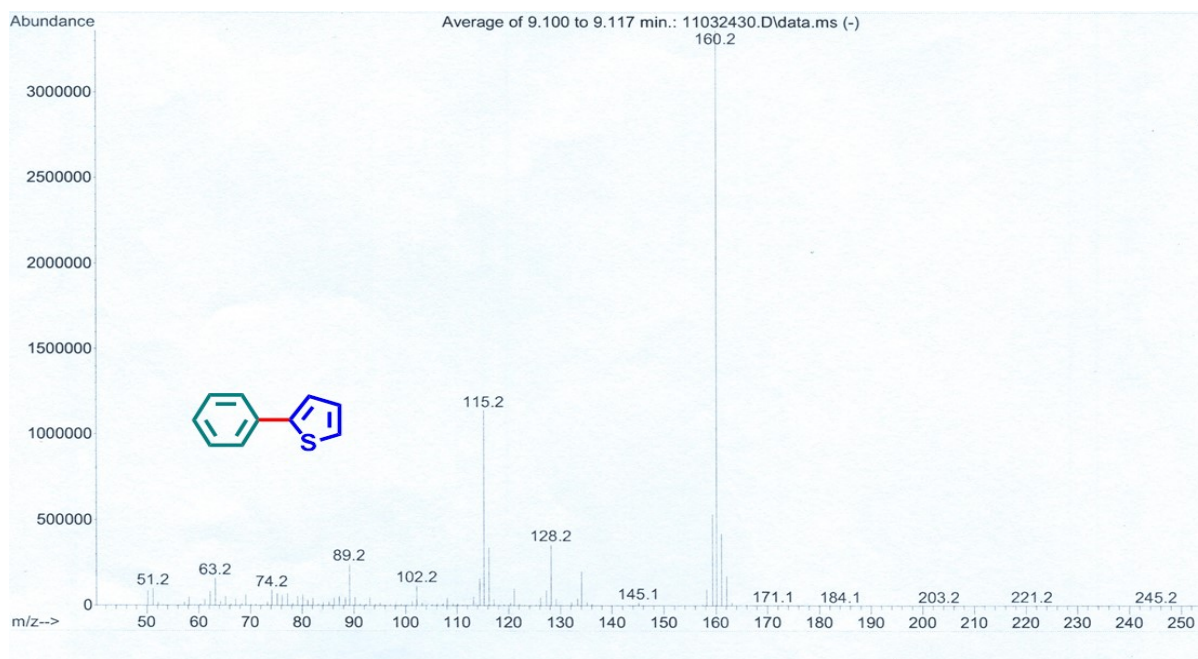

Figure S35: GC-MS spectrum of 7j.

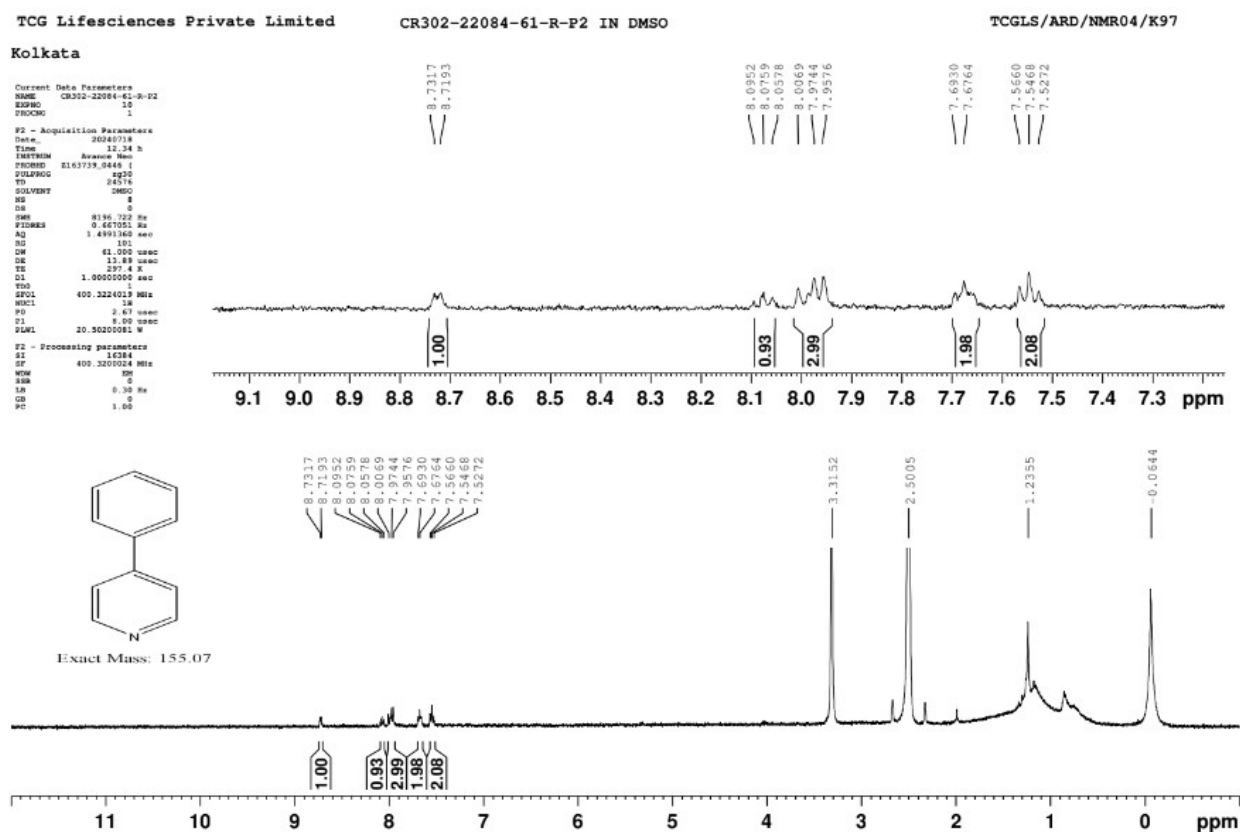

Figure S36: <sup>1</sup>H NMR spectrum of 7k.



Kolkata

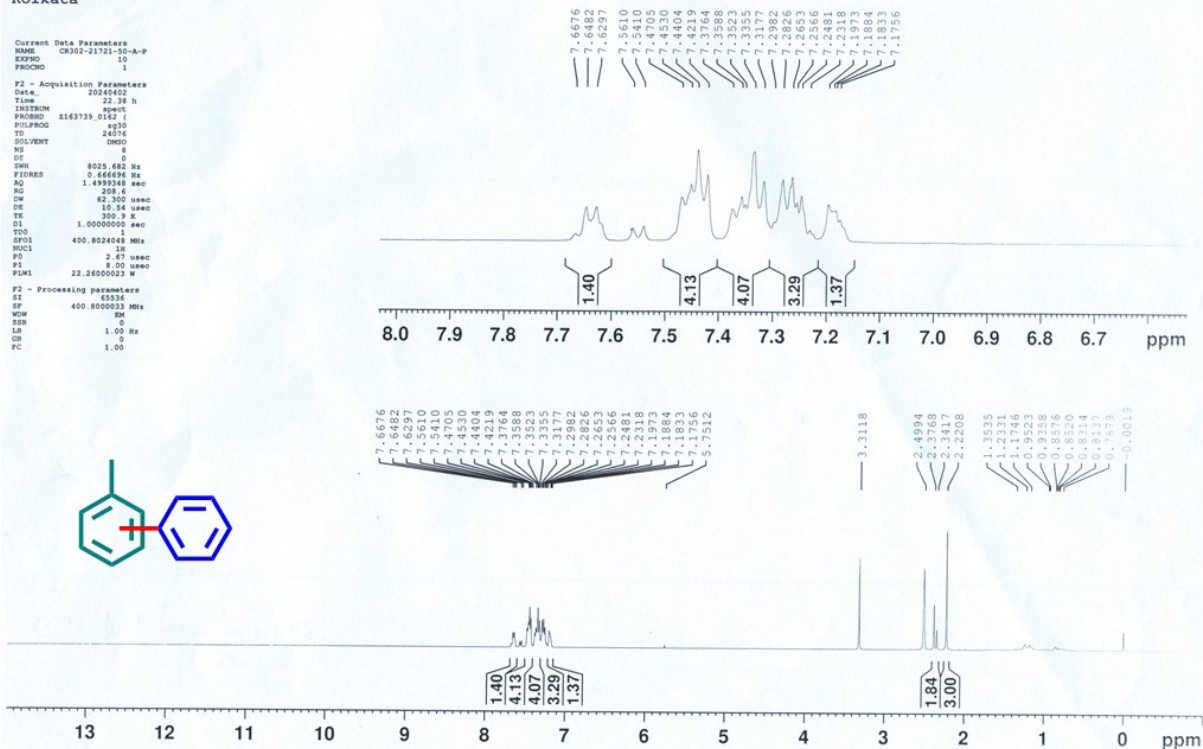Figure S39:  $^1\text{H}$  NMR spectrum of **8a**.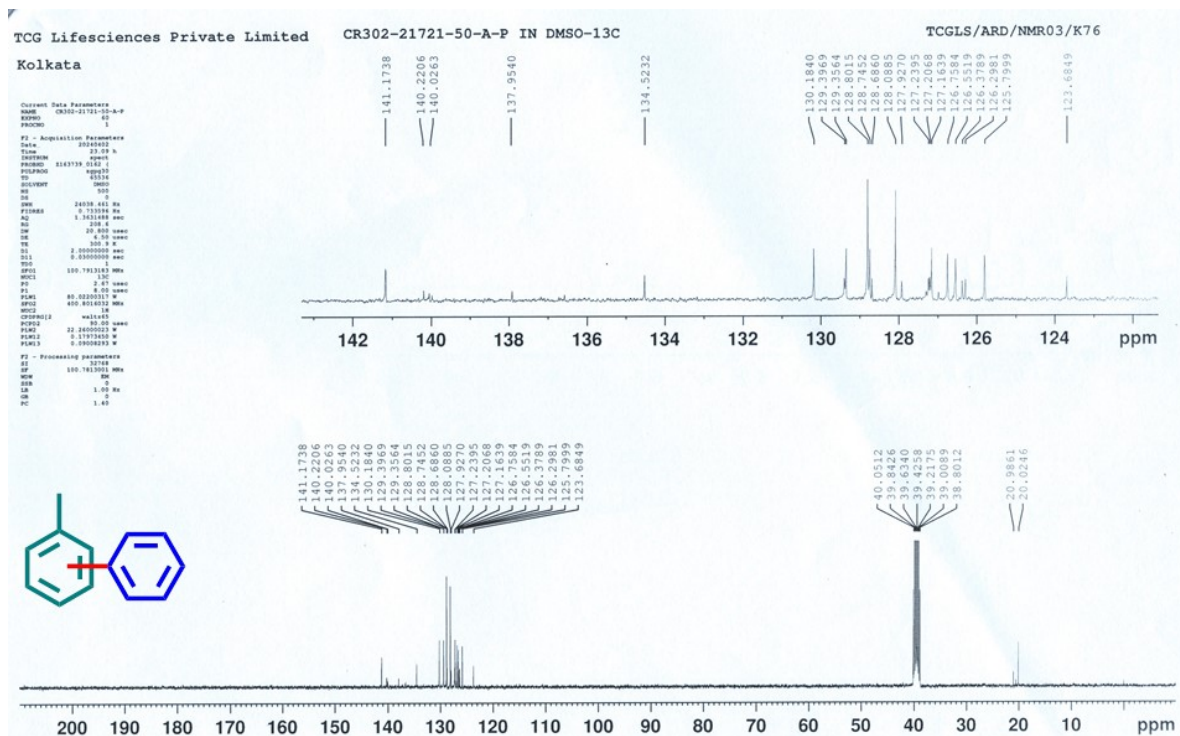Figure S40:  $^{13}\text{C}$   $\{^1\text{H}\}$  NMR spectrum of **8a**.



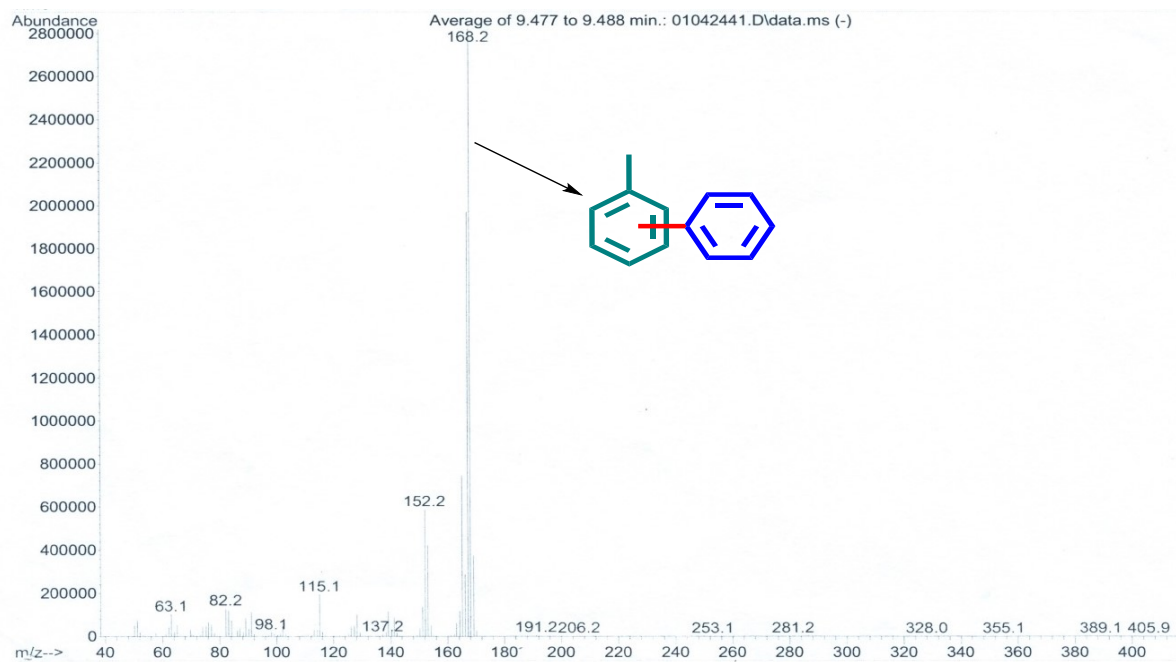

Figure S41: GC-MS spectrum of 8a.

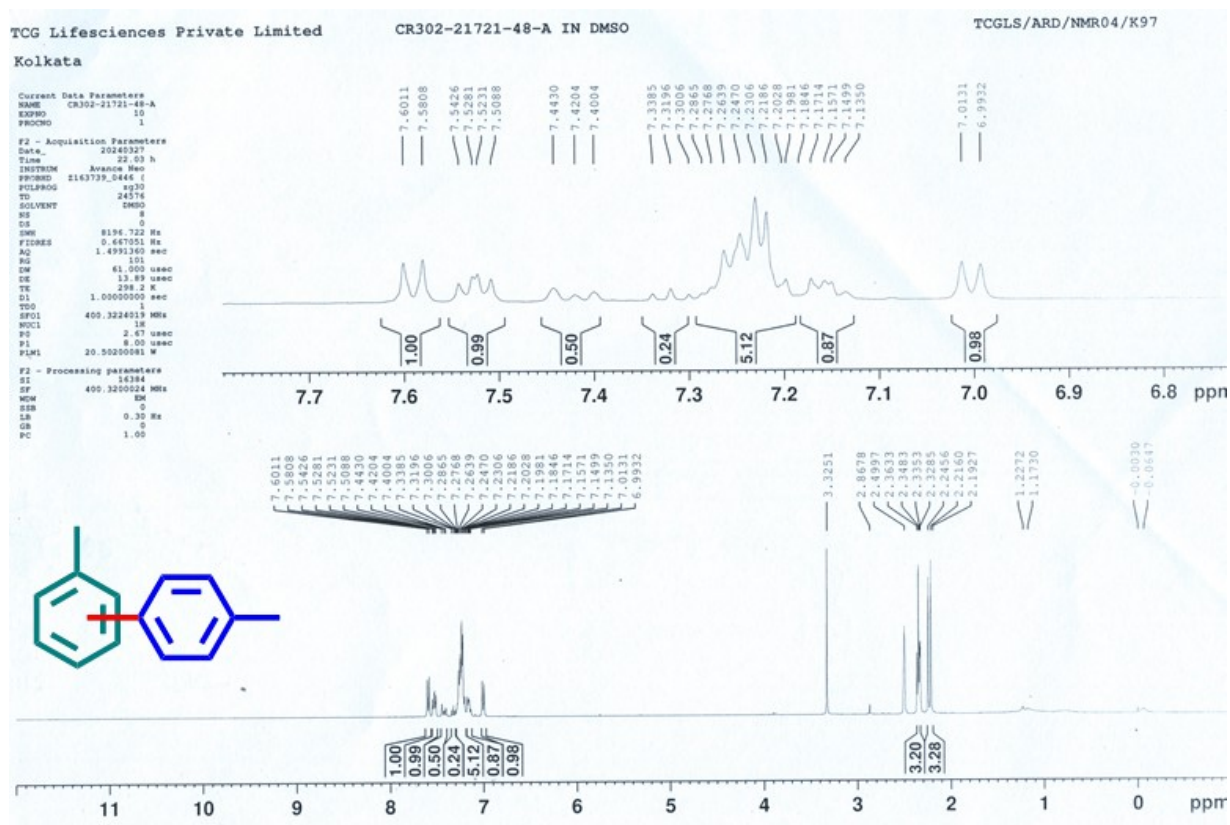

Figure S42: <sup>1</sup>H NMR spectrum of 8b.

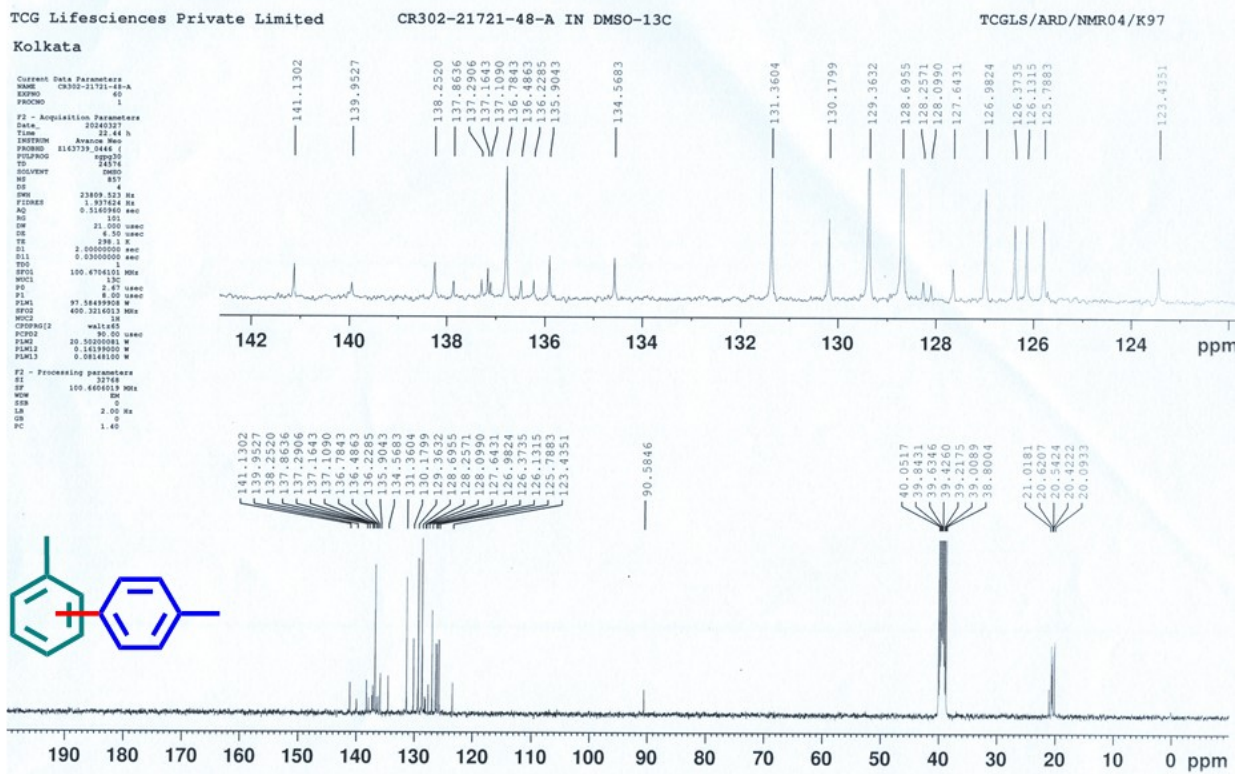

Figure S43:  $^{13}\text{C}$   $\{^1\text{H}\}$  NMR spectrum of **8b**.

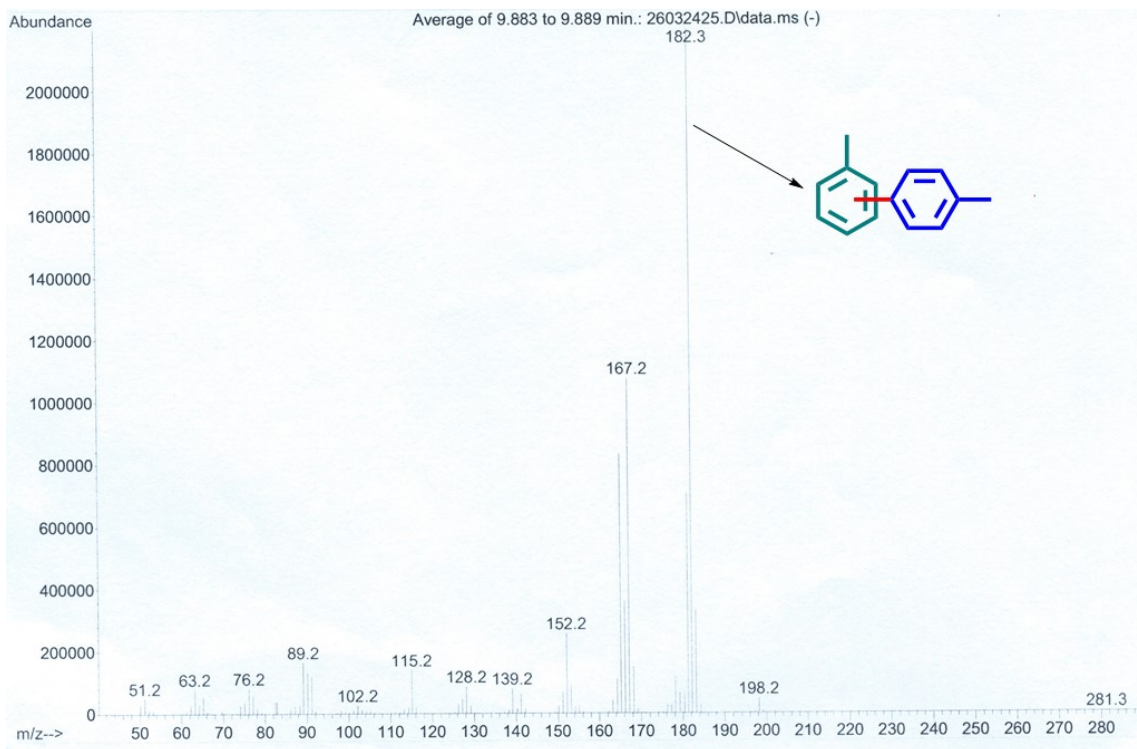

Figure S44: GC-MS spectrum of **8b**.



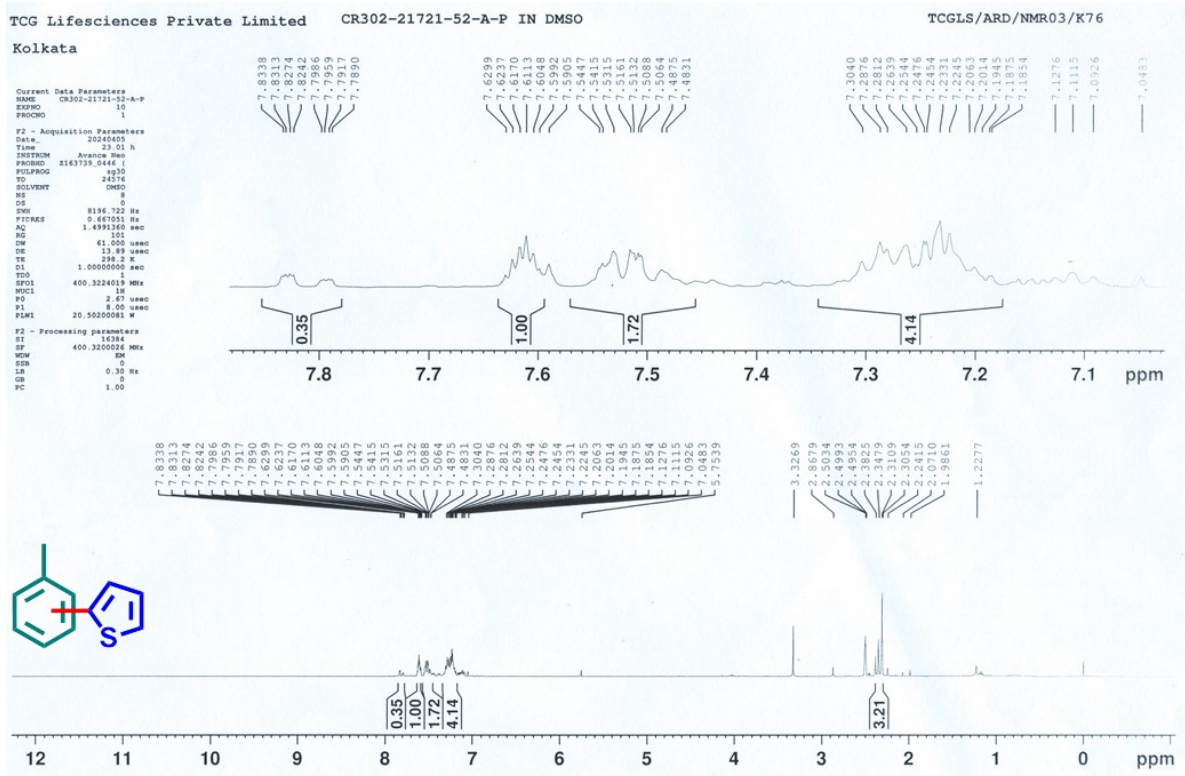

Figure S45:  $^1\text{H}$  NMR spectrum of **8c**.

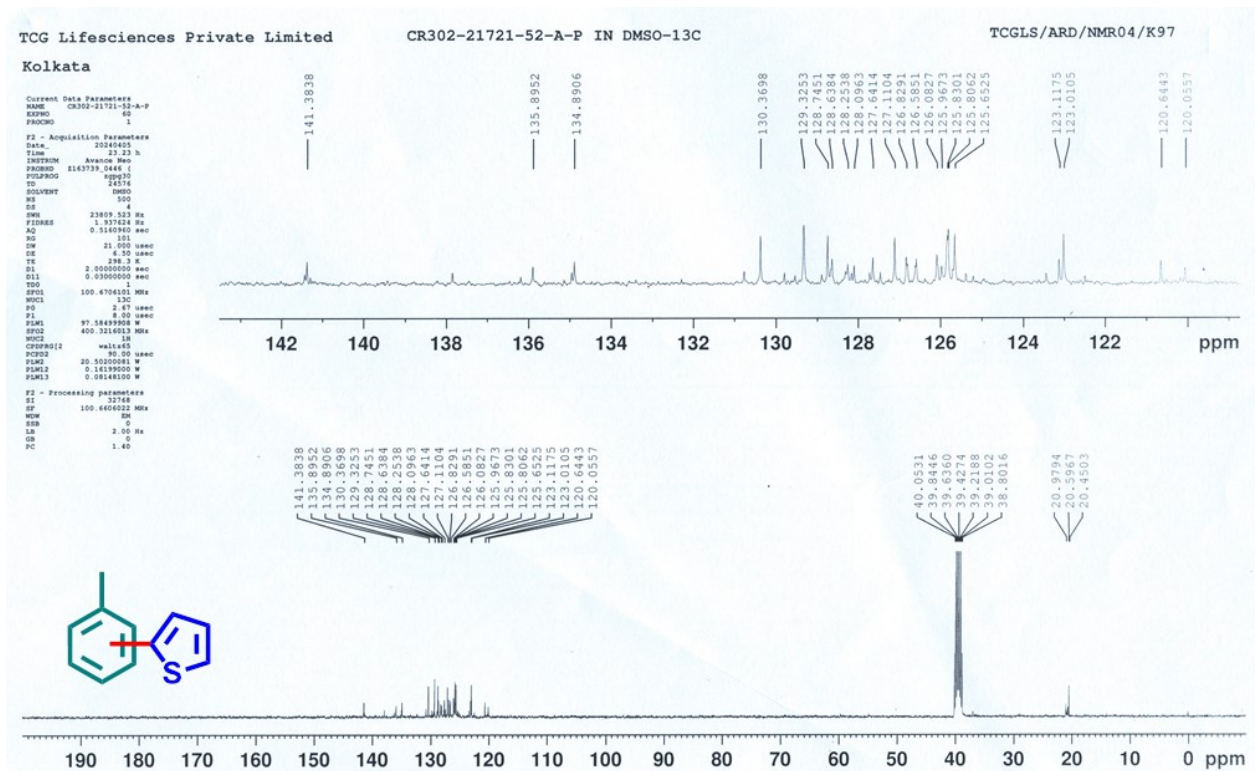

Figure S46:  $^{13}\text{C}$   $\{^1\text{H}\}$  NMR spectrum of **8c**.



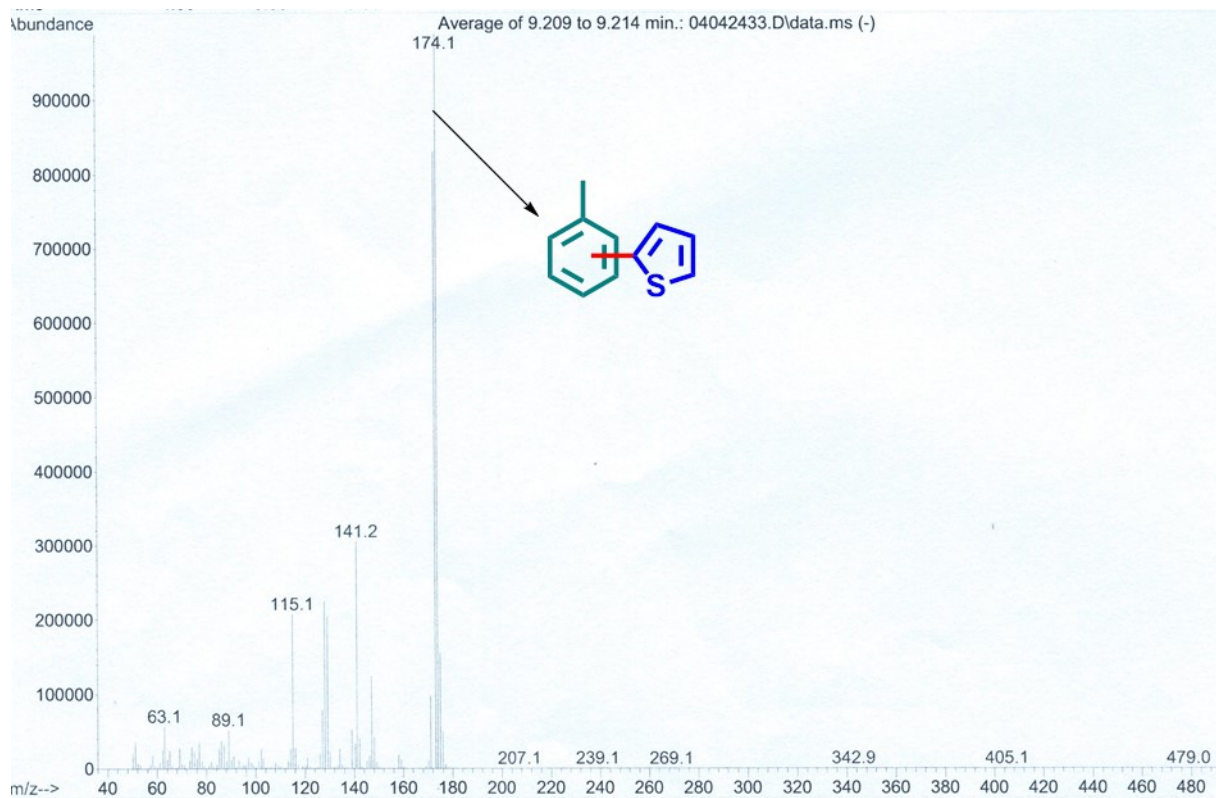

Figure S47: GC-MS spectrum of **8c**.

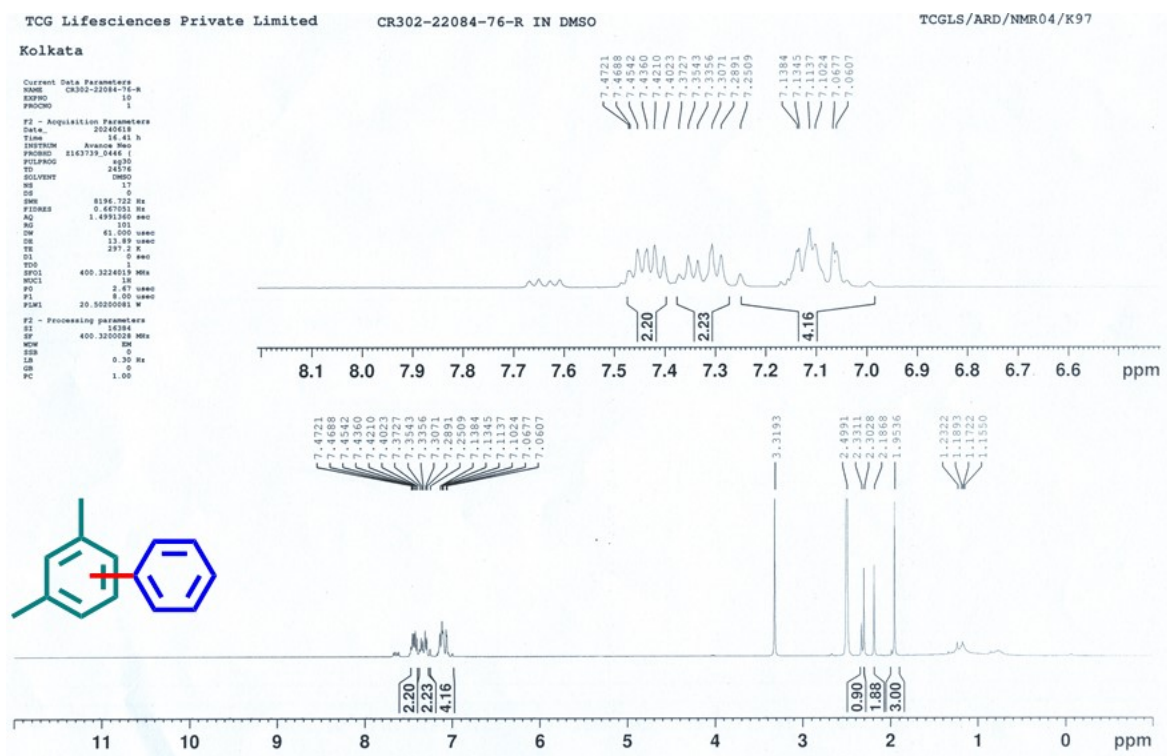

Figure S48: <sup>1</sup>H NMR spectrum of **8d**.

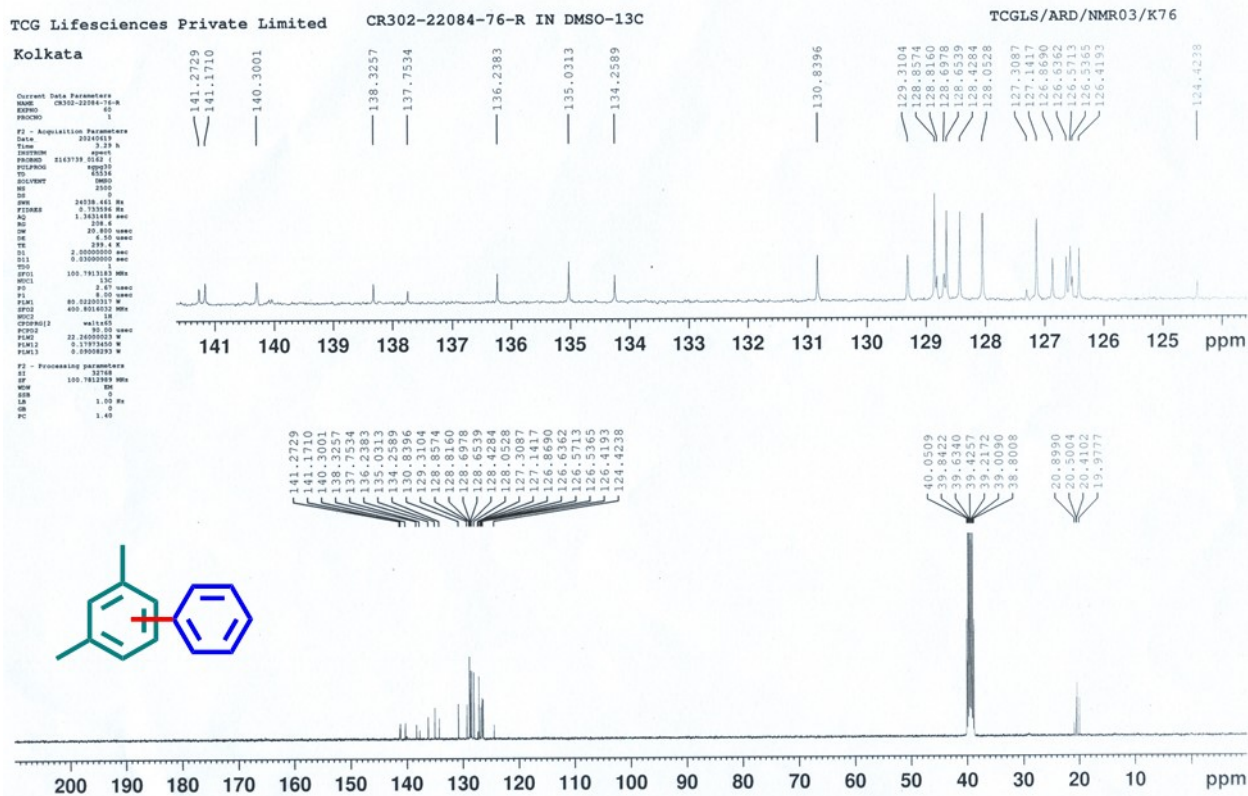

Figure S49:  $^{13}\text{C} \{^1\text{H}\}$  NMR spectrum of **8d**.

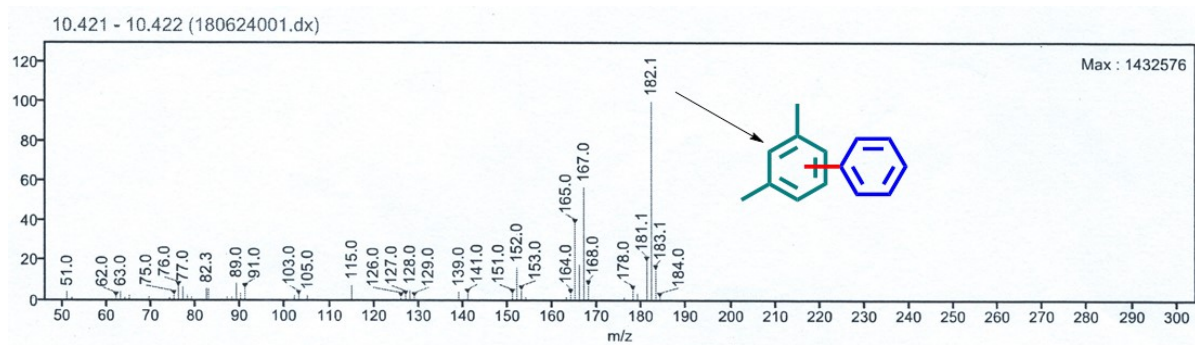

Figure S50: GC-MS spectrum of **8d**.

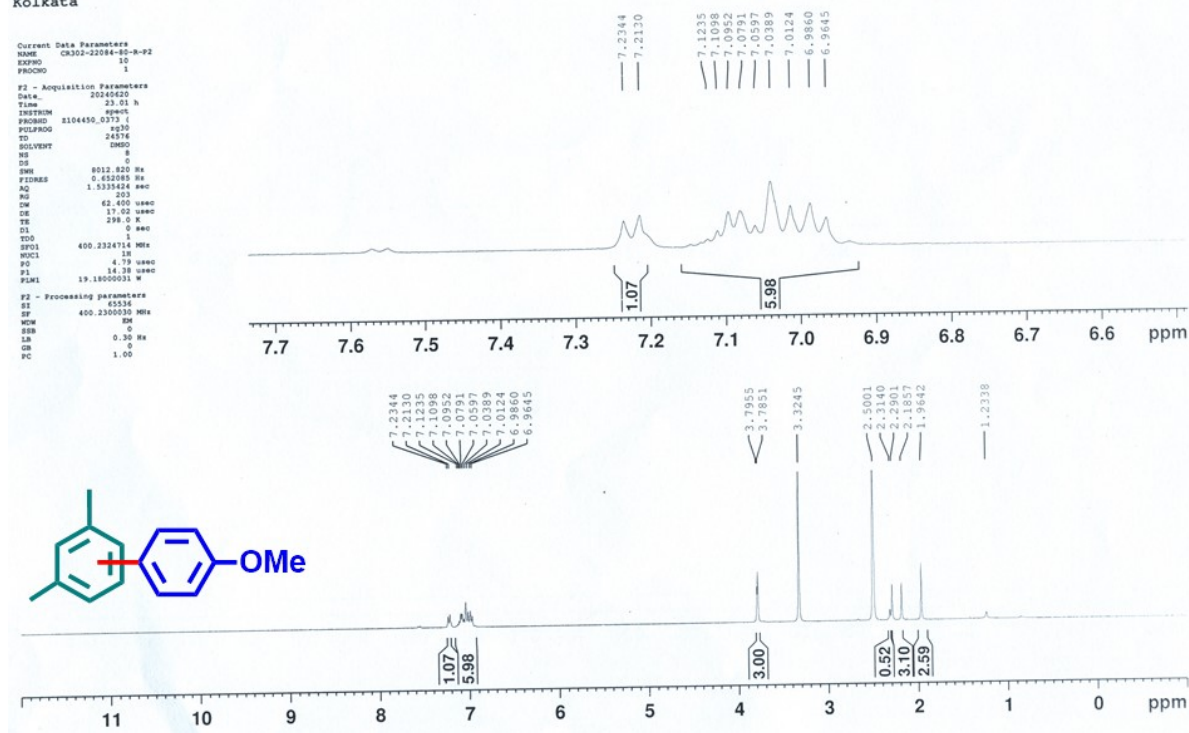

Figure S51:  $^1\text{H}$  NMR spectrum of **8e**.

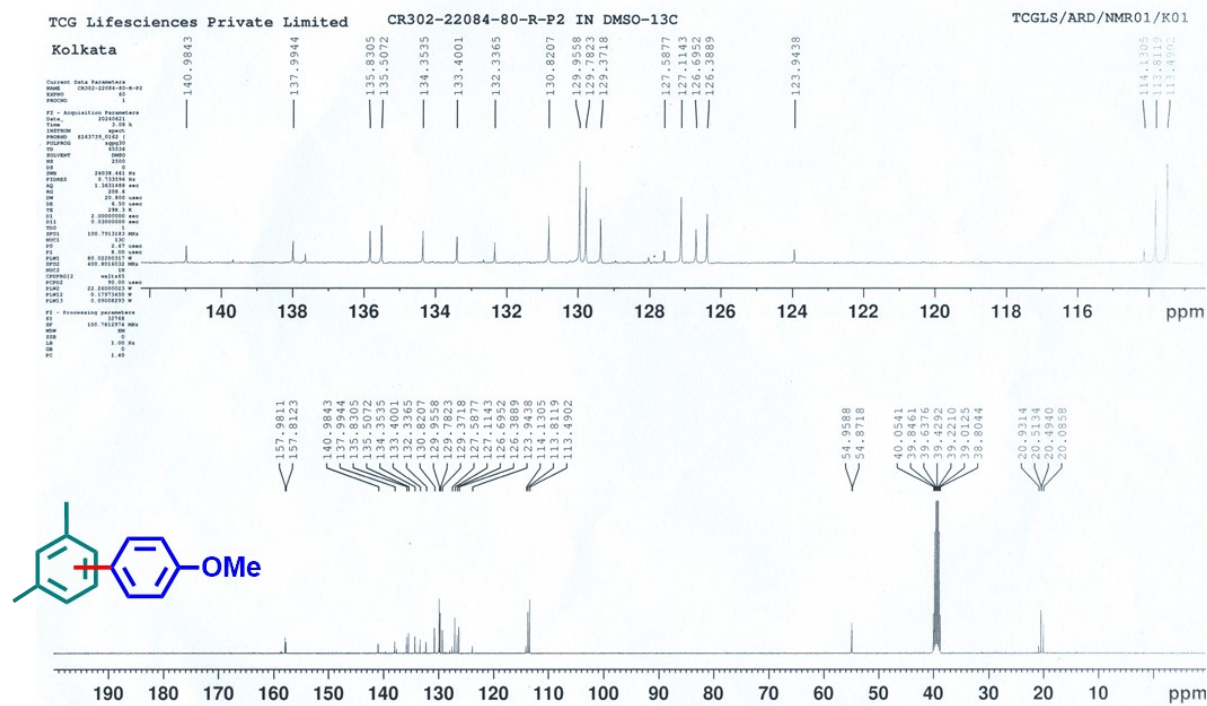

Figure S52:  $^{13}\text{C}$   $\{^1\text{H}\}$  NMR spectrum of **8e**.



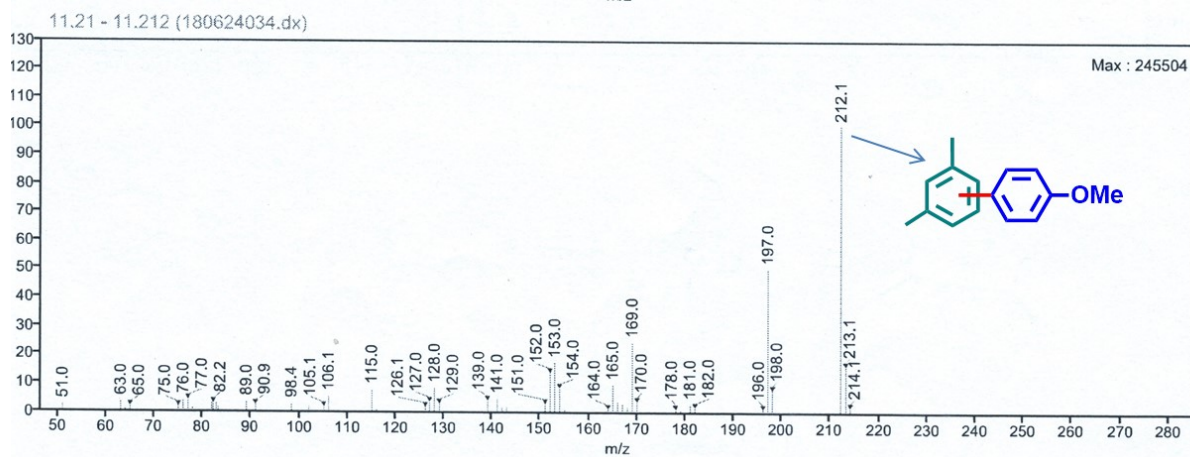

Figure S53: GC-MS spectrum of 8e.

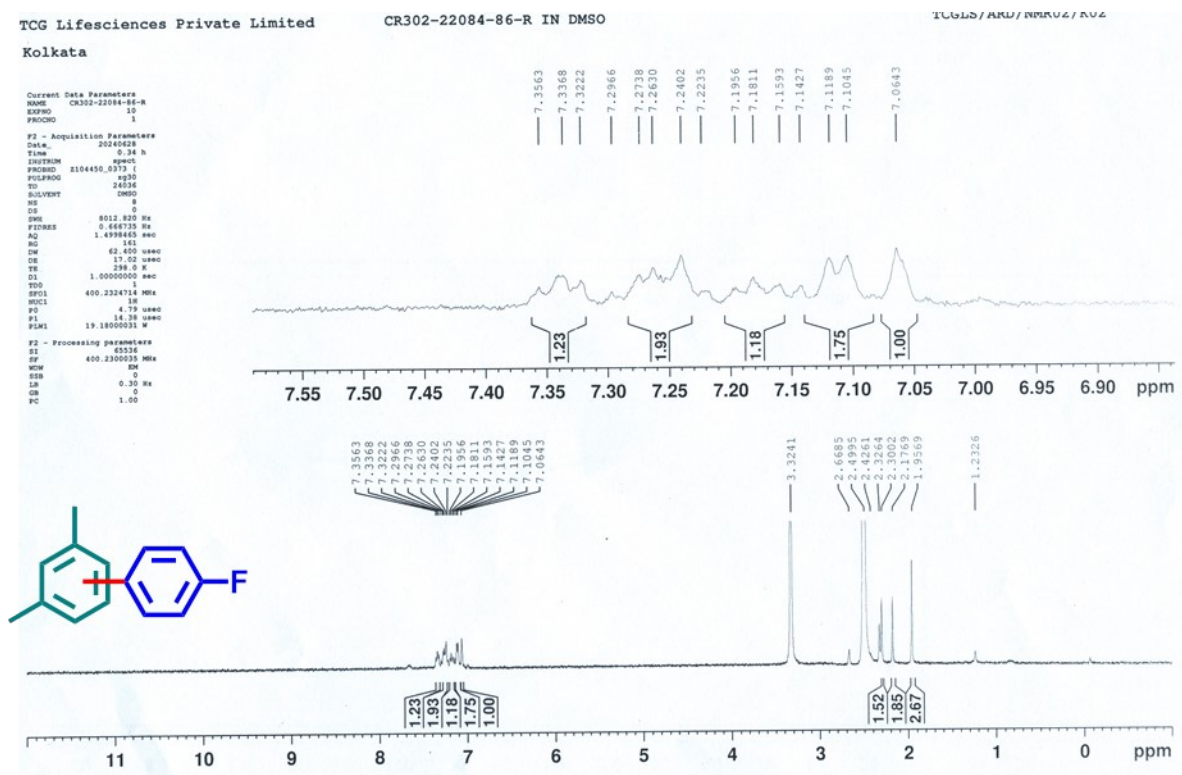

Figure S54:  $^1\text{H}$  NMR spectrum of 8f.

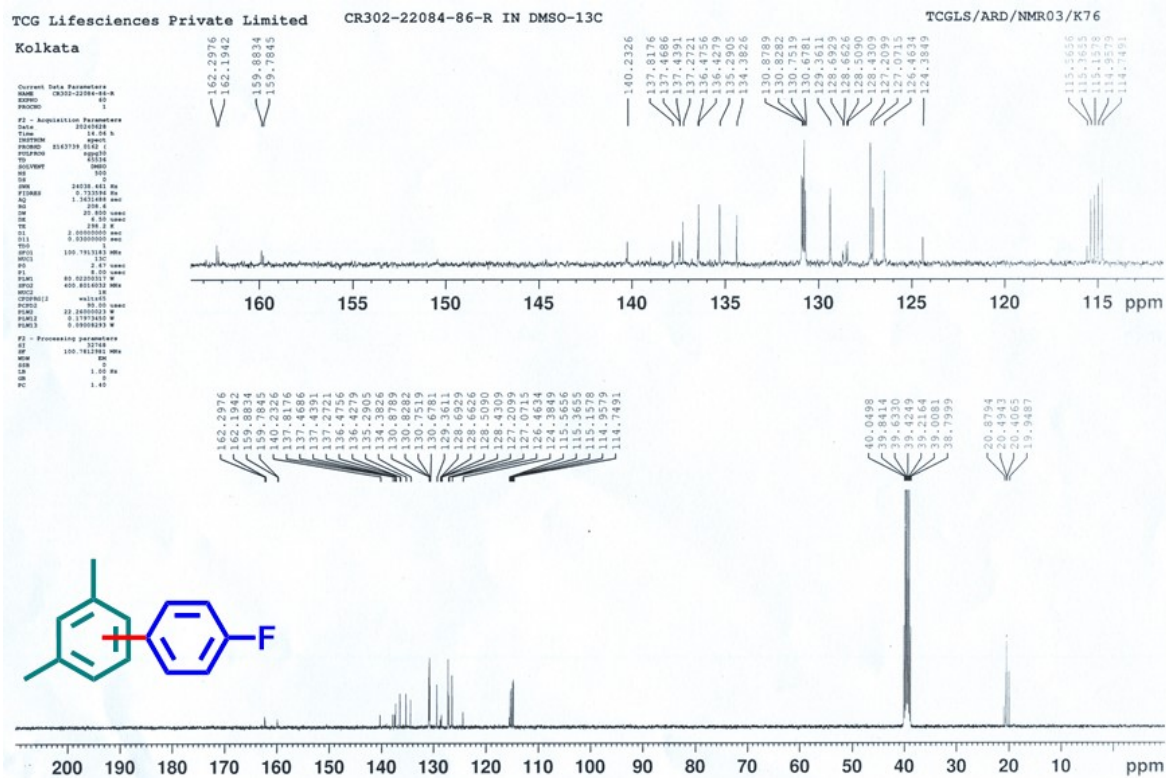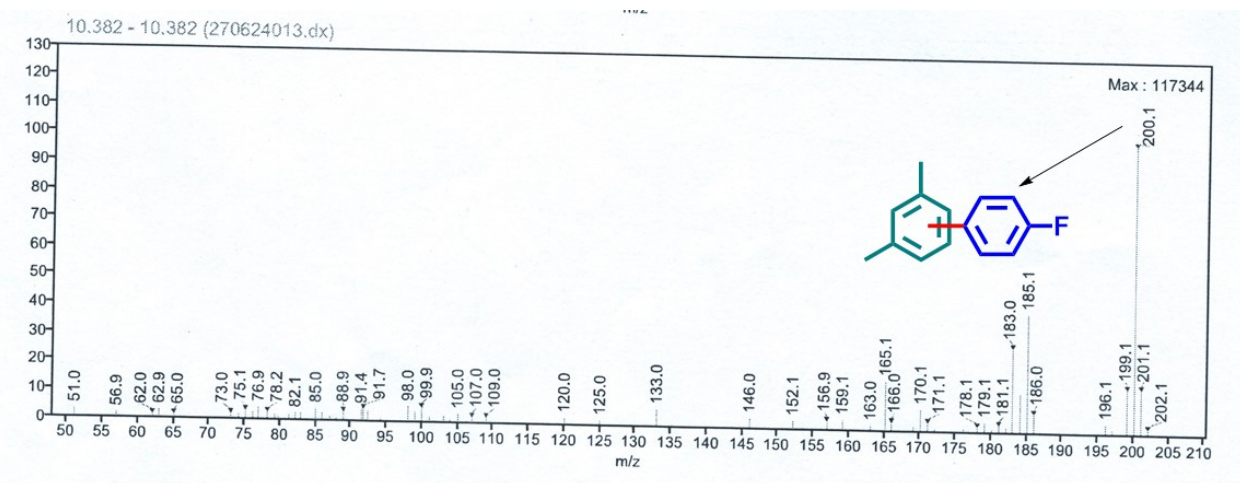





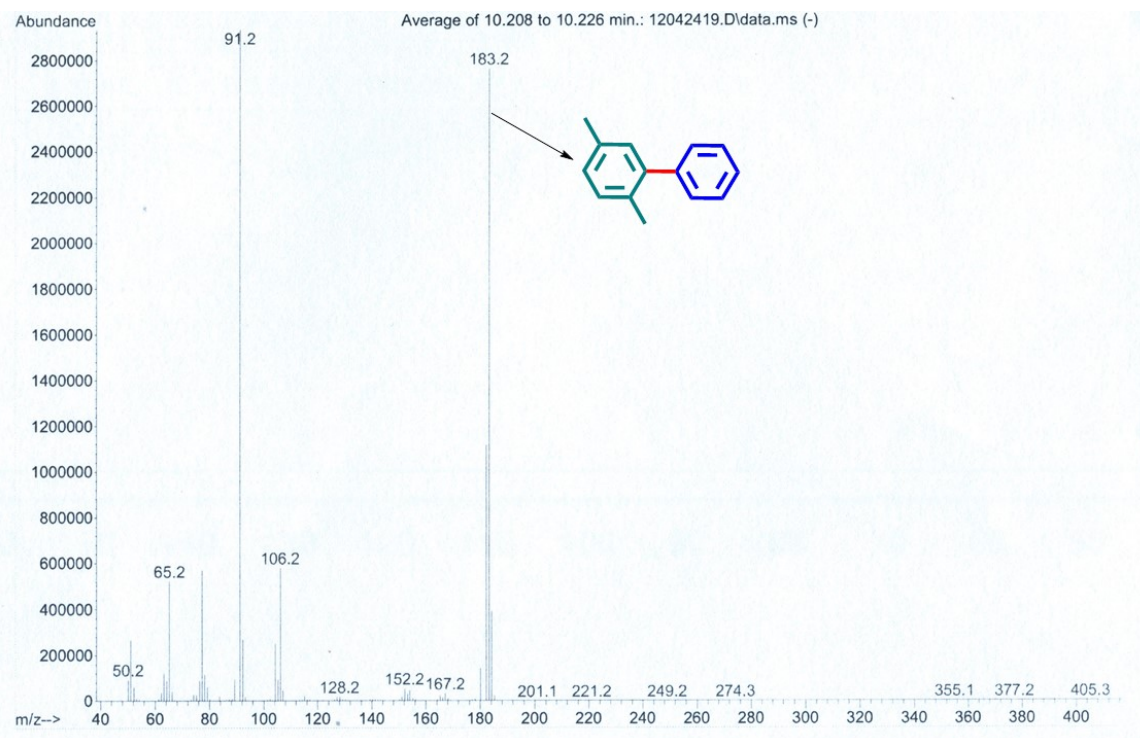

Figure S59: GC-MS spectrum of **8g**.

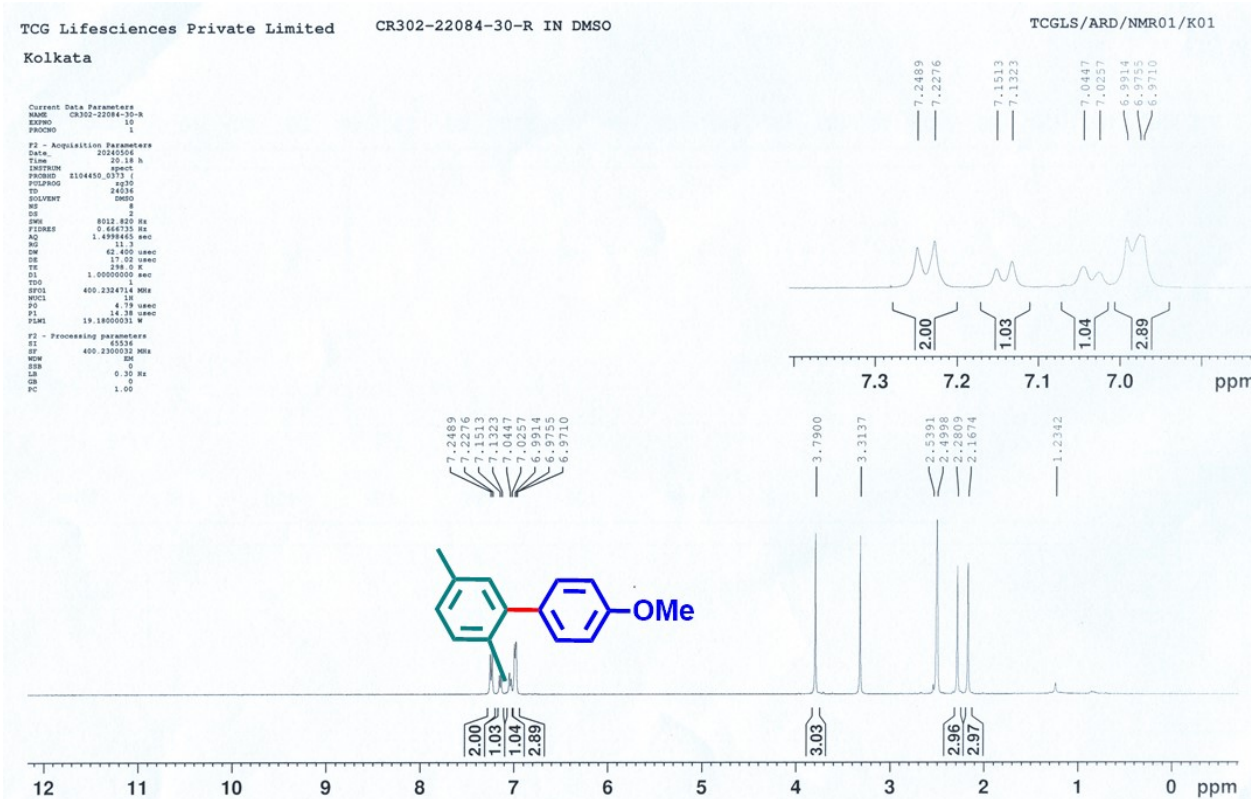

Figure S60:  $^1\text{H}$  NMR spectrum of **8h**.

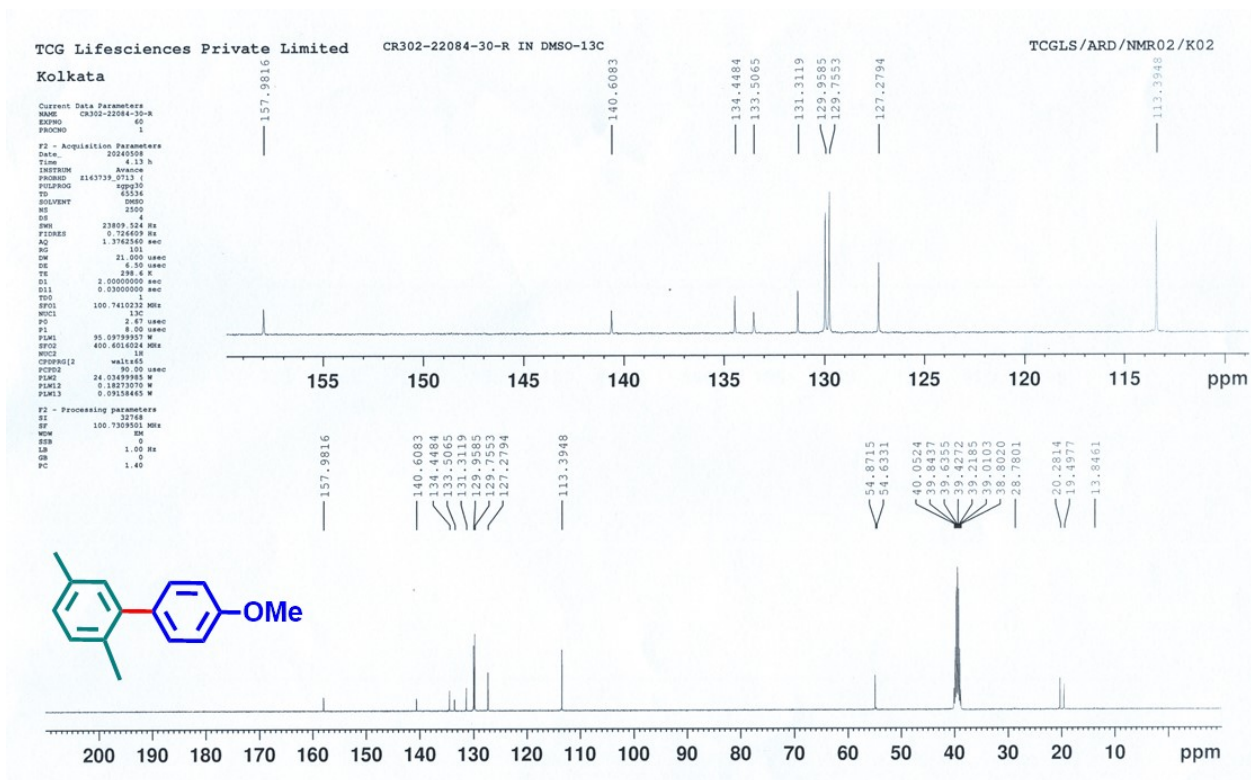

Figure S61:  $^{13}\text{C}$   $\{^1\text{H}\}$  NMR spectrum of **8h**.

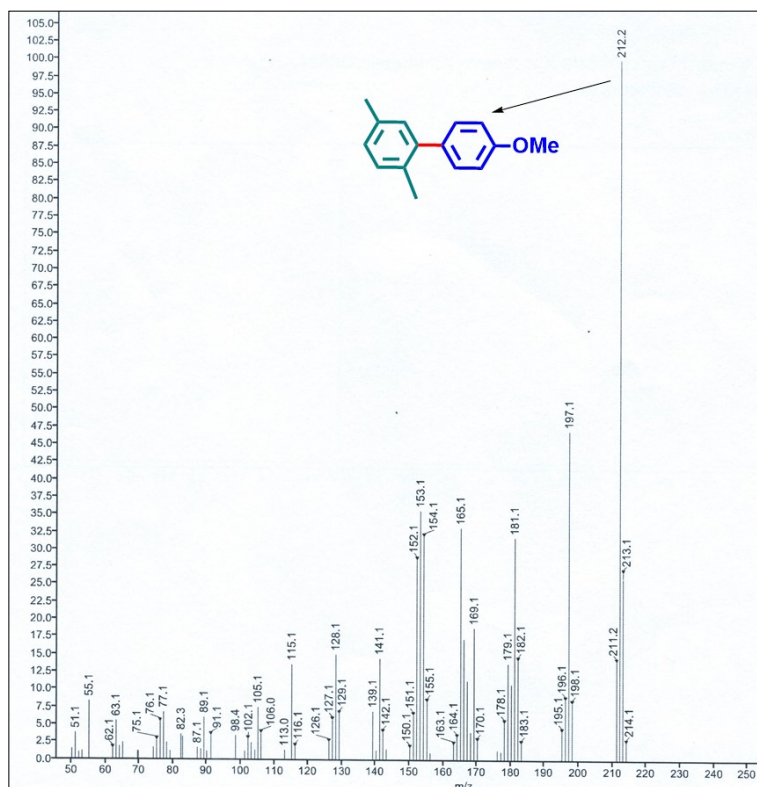

Figure S62: GC-MS spectrum of **8h**.



Kolkata

Current Data Parameters  
 NAME CR302-22084-42-R  
 EXPNO 10  
 PROCNO 1  
 F2 - Acquisition Parameters  
 Date\_ 20240515  
 Time 16.40 h  
 INSTRUM Avance 500  
 PROBHD 1163739\_0446 (1  
 PULPROG zgpg30  
 TD 24576  
 SOLVENT DMSO  
 NS 8  
 DS 0  
 SWH 8196.722 Hz  
 FIDRES 0.667051 Hz  
 AQ 1.4912160 sec  
 RG 6  
 CW 61.000 usec  
 DE 13.89 usec  
 TE 297.6 K  
 D1 1.00000000 sec  
 TDO  
 SFO1 400.3224919 MHz  
 NUC1 1H  
 P0 2.47 usec  
 P1 8.00 usec  
 PL1 20.5020092 W  
 F2 - Processing parameters  
 SI 16384  
 SF 400.3200223 MHz  
 NCM  
 SSB 0  
 LB 0.30 Hz  
 GB 0  
 PC 1.00

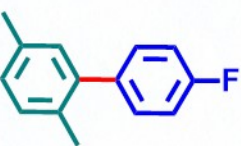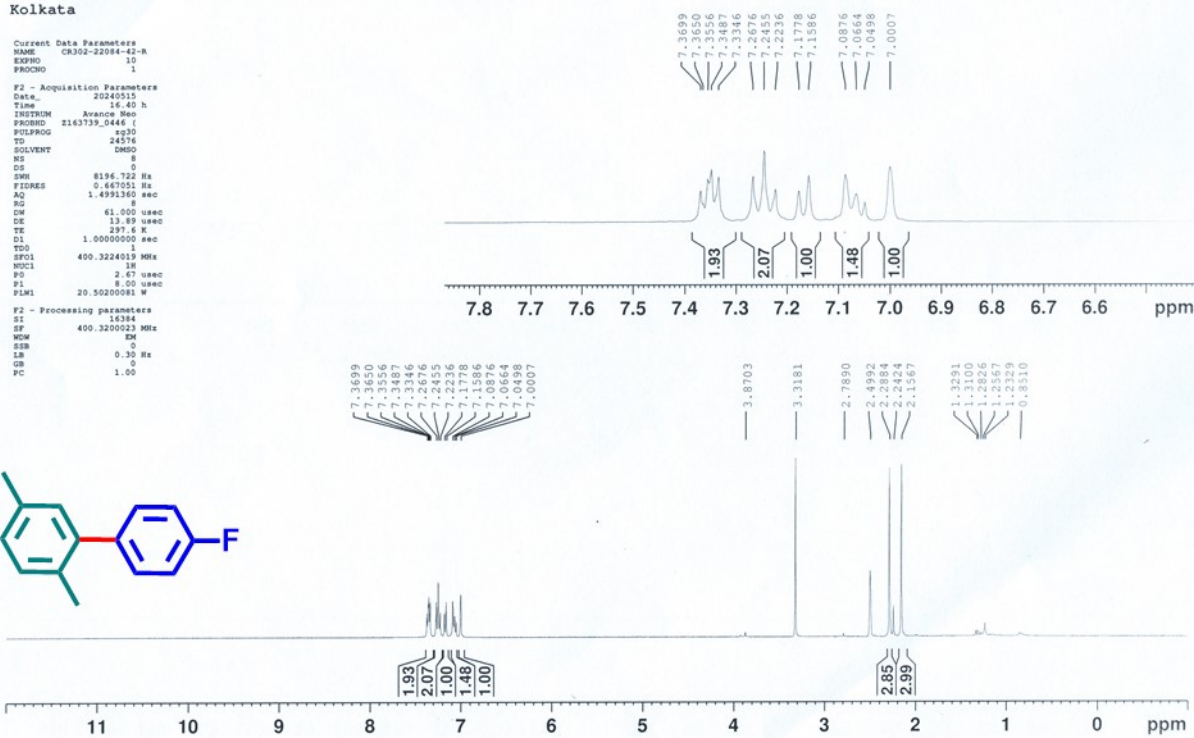

Figure S63: <sup>1</sup>H NMR spectrum of **8i**.

Kolkata

Current Data Parameters  
 NAME CR302-22084-42-R  
 EXPNO 10  
 PROCNO 1  
 F2 - Acquisition Parameters  
 Date\_ 20240515  
 Time 4.09 h  
 INSTRUM Avance 500  
 PROBHD 1163739\_0446 (1  
 PULPROG zgpg30  
 TD 24576  
 SOLVENT DMSO  
 NS 8  
 DS 0  
 SWH 24036.463 Hz  
 FIDRES 0.131066 Hz  
 AQ 1.3421216 sec  
 RG 6  
 CW 20.800 usec  
 DE 6.50 usec  
 TE 299.0 K  
 D1 2.00000000 sec  
 TDO  
 SFO1 100.7812813 MHz  
 NUC1 13C  
 P1 8.00 usec  
 PL1 80.82200000 W  
 F2 - Processing parameters  
 SI 32768  
 SF 100.7812813 MHz  
 NCM  
 SSB 0  
 LB 1.00 Hz  
 GB 0  
 PC 1.40

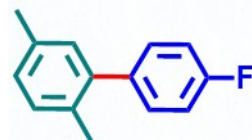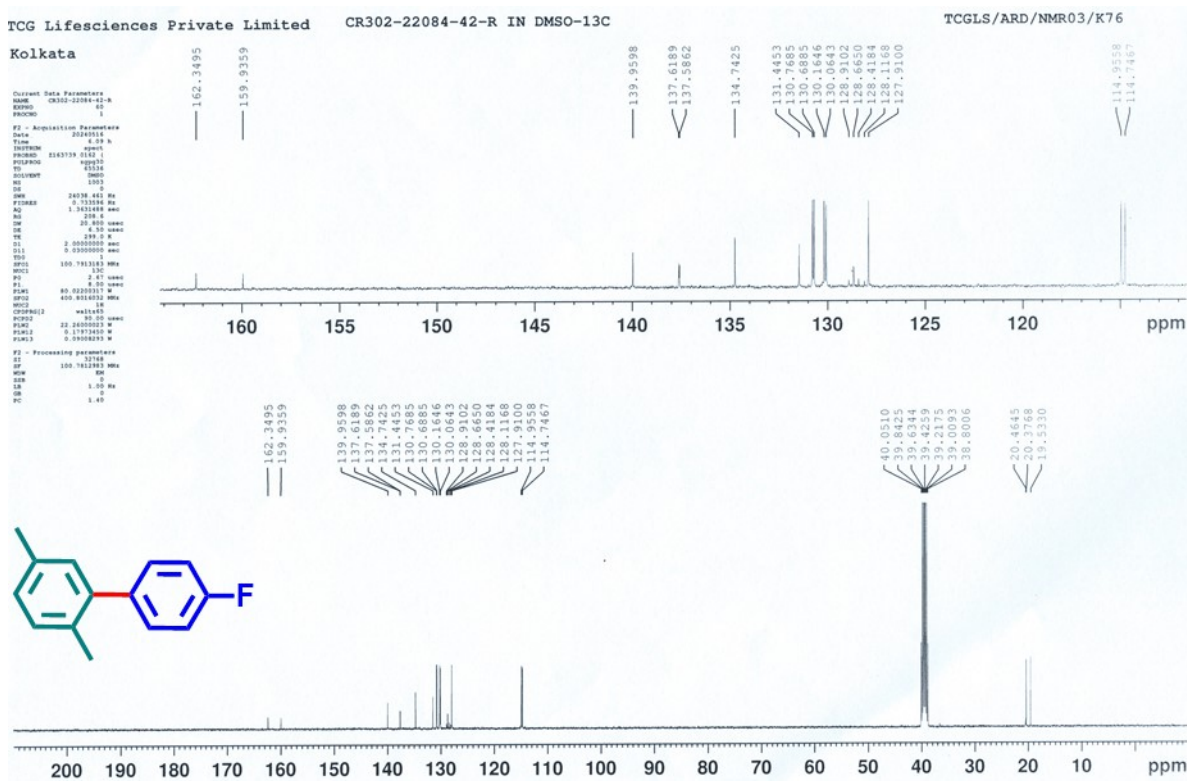

Figure S64: <sup>13</sup>C {<sup>1</sup>H} NMR spectrum of **8i**.

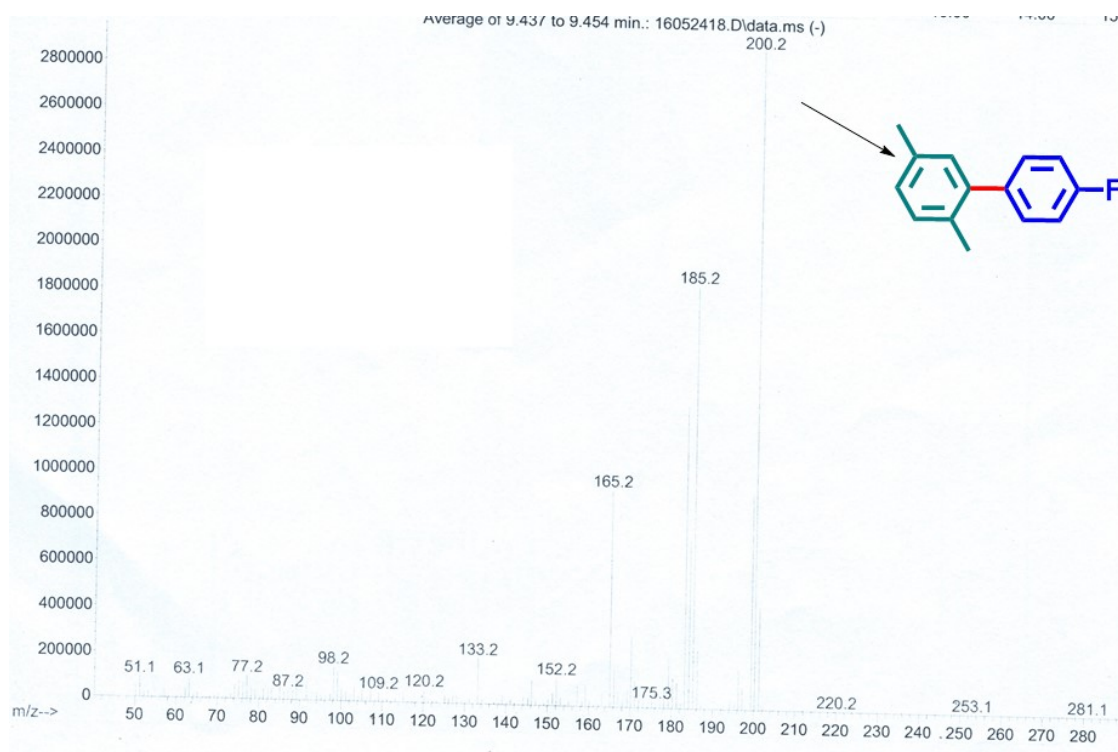

Figure S65: GC-MS spectrum of **8i**.

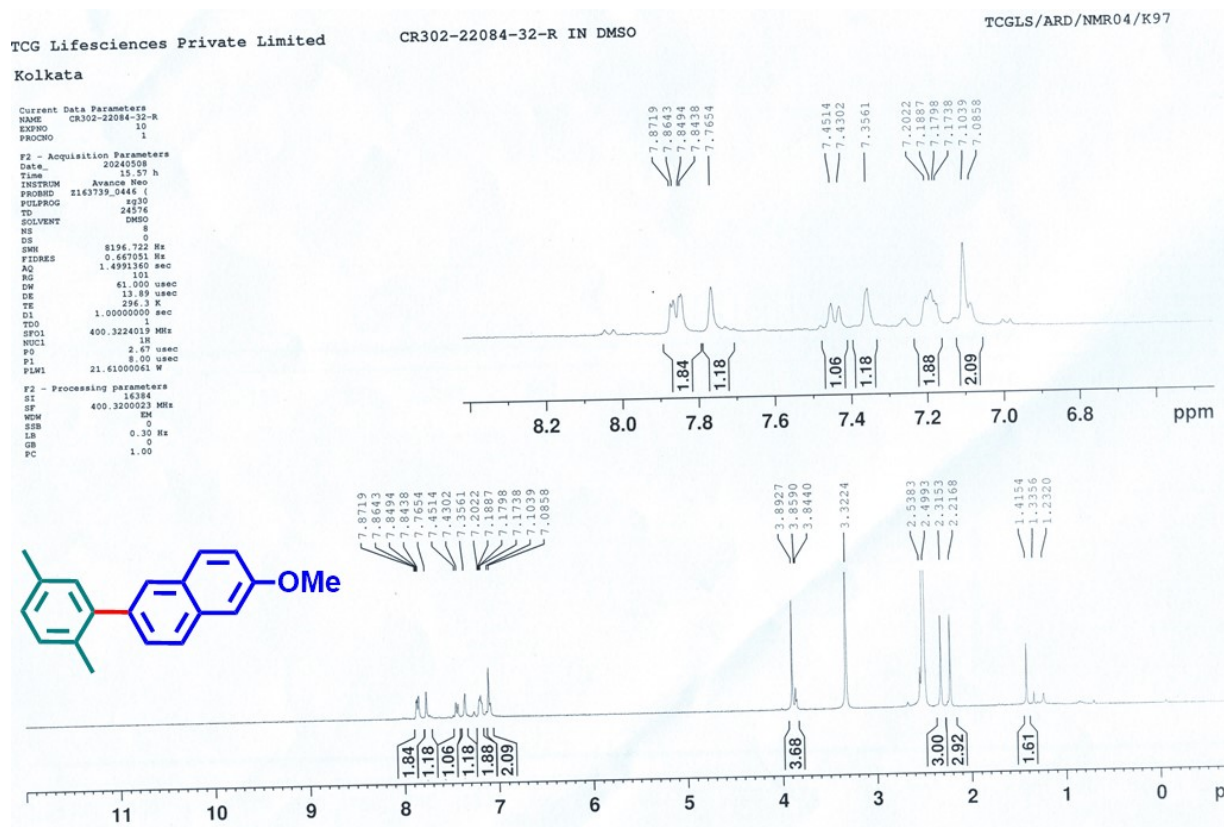

Figure S66:  $^1\text{H}$  NMR spectrum of **8j**





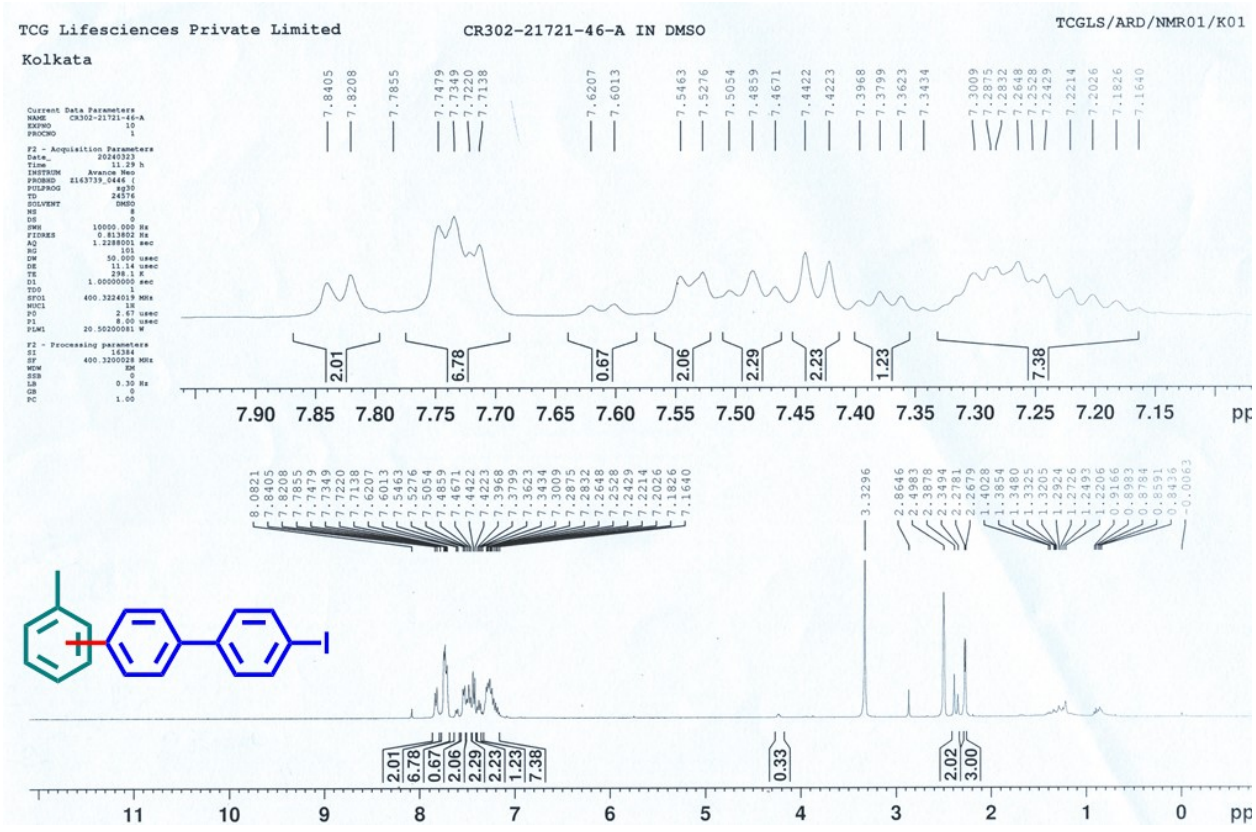

Figure S69: <sup>1</sup>H NMR spectrum of 8k.

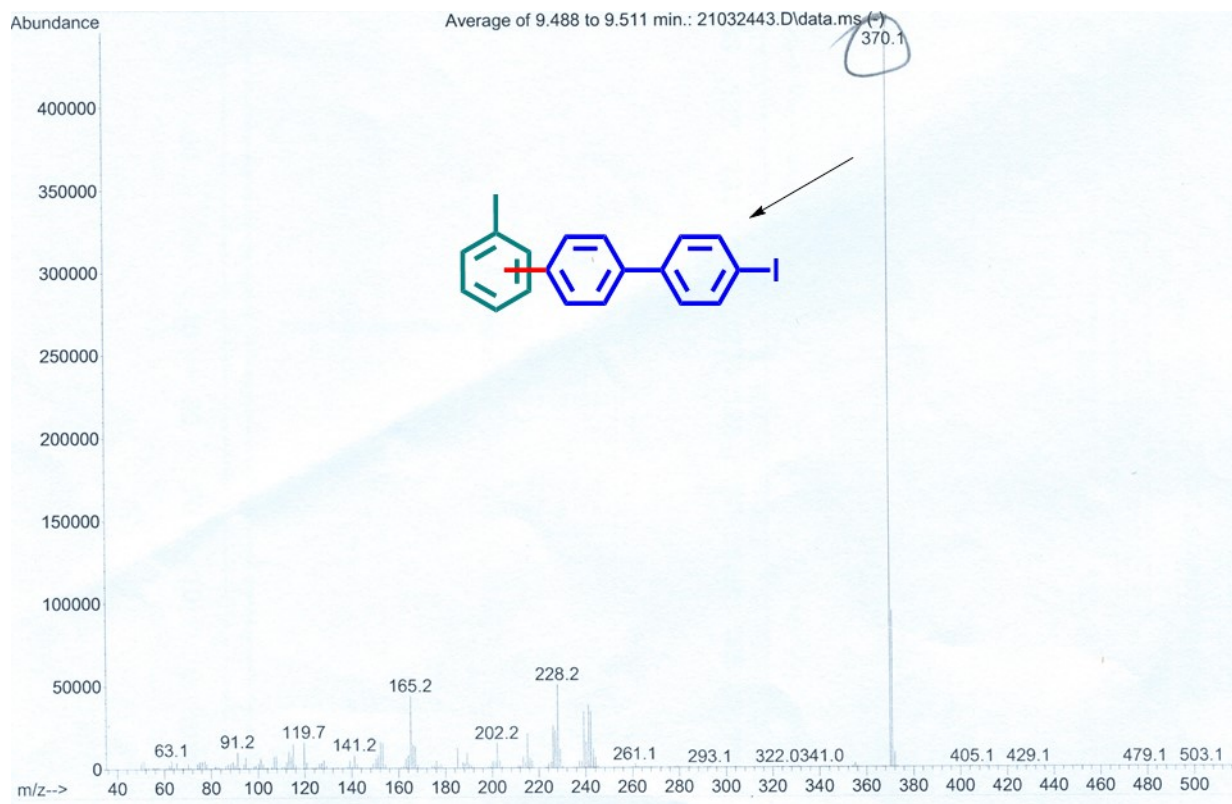

Figure S70: GC-MS spectrum of 8k.



Kolkata

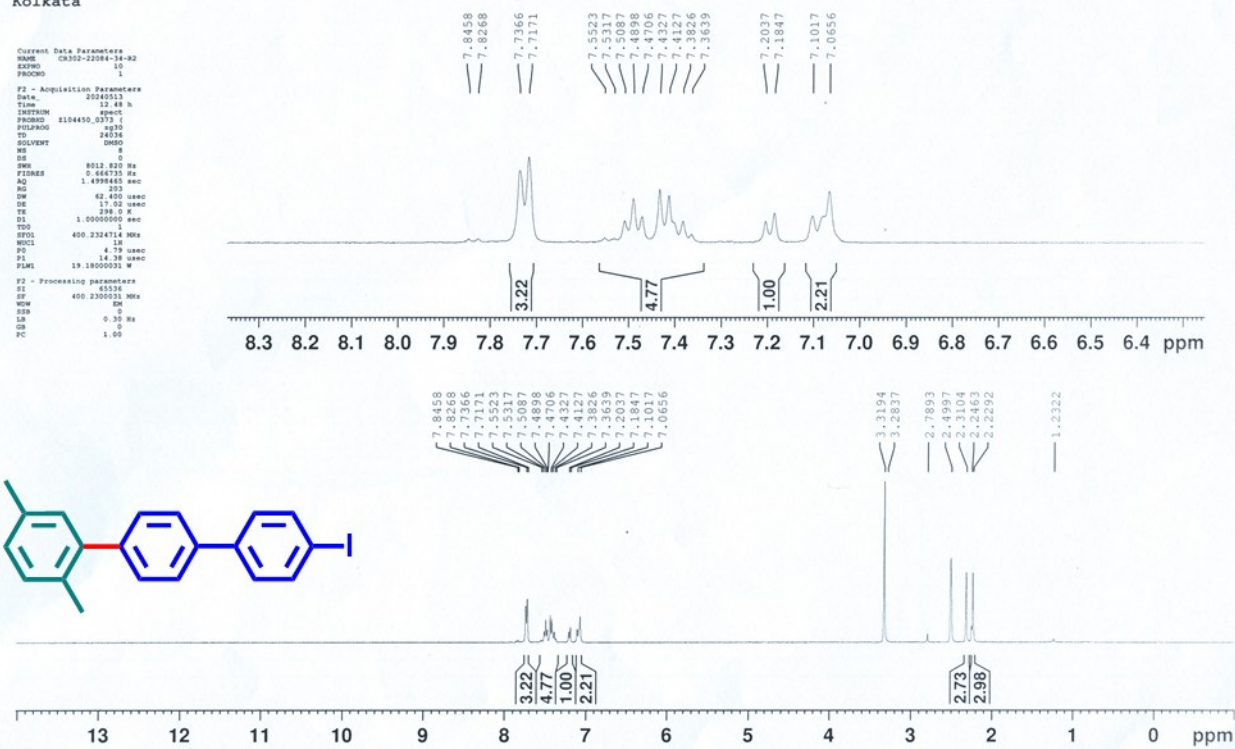Figure S71:  $^1\text{H}$  NMR spectrum of **8I**.

Kolkata

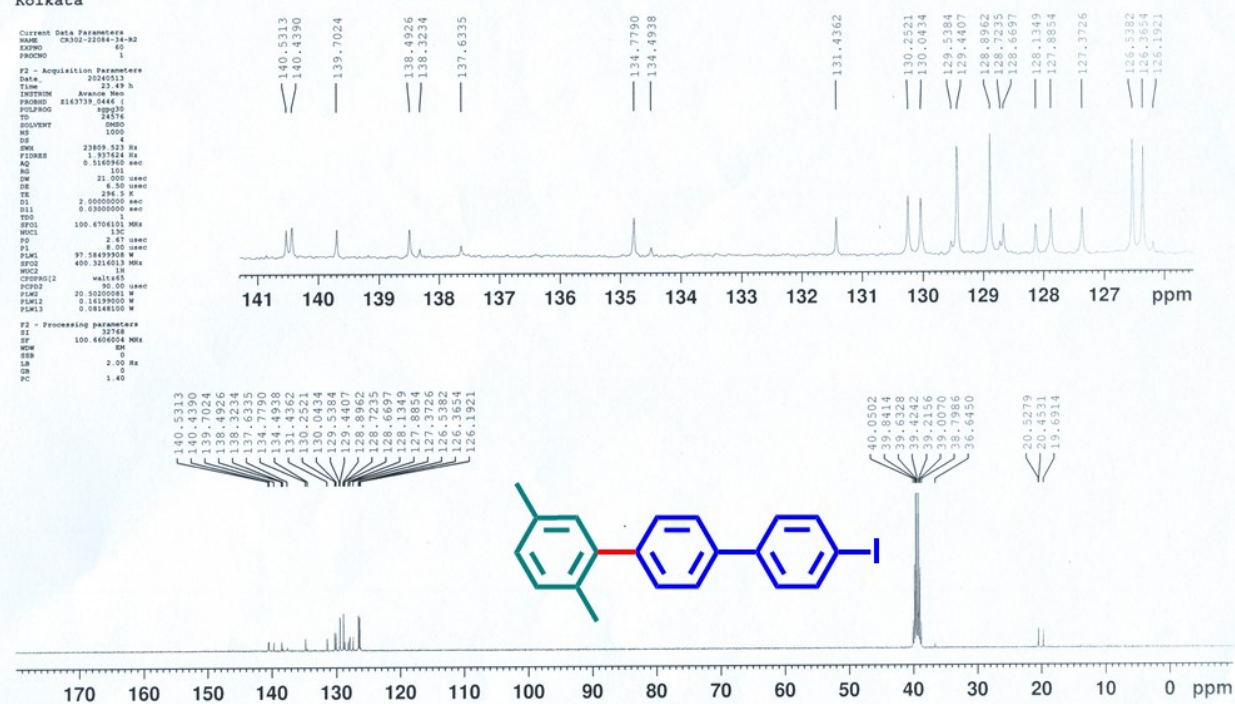Figure S72:  $^{13}\text{C}$   $\{^1\text{H}\}$  NMR spectrum of **8I**.

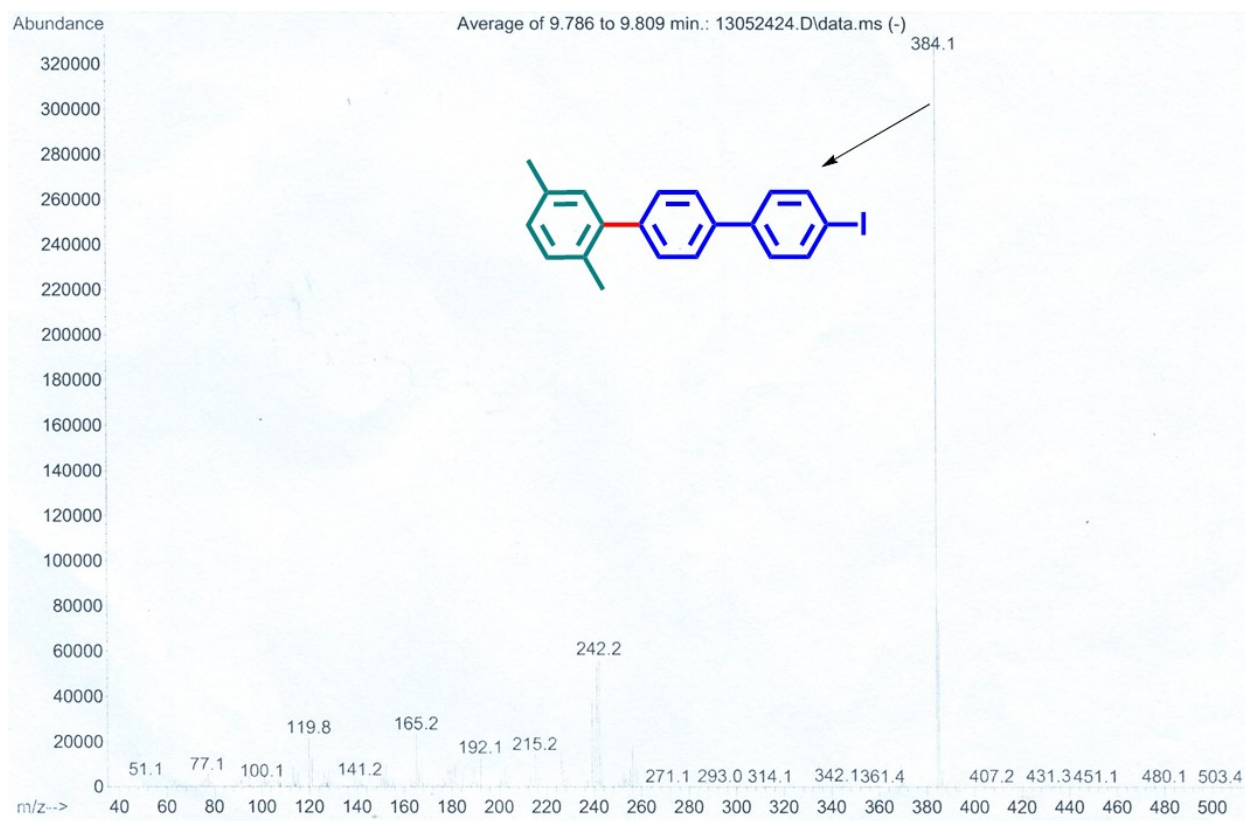

**Figure S73:** GC-MS spectrum of **81**.

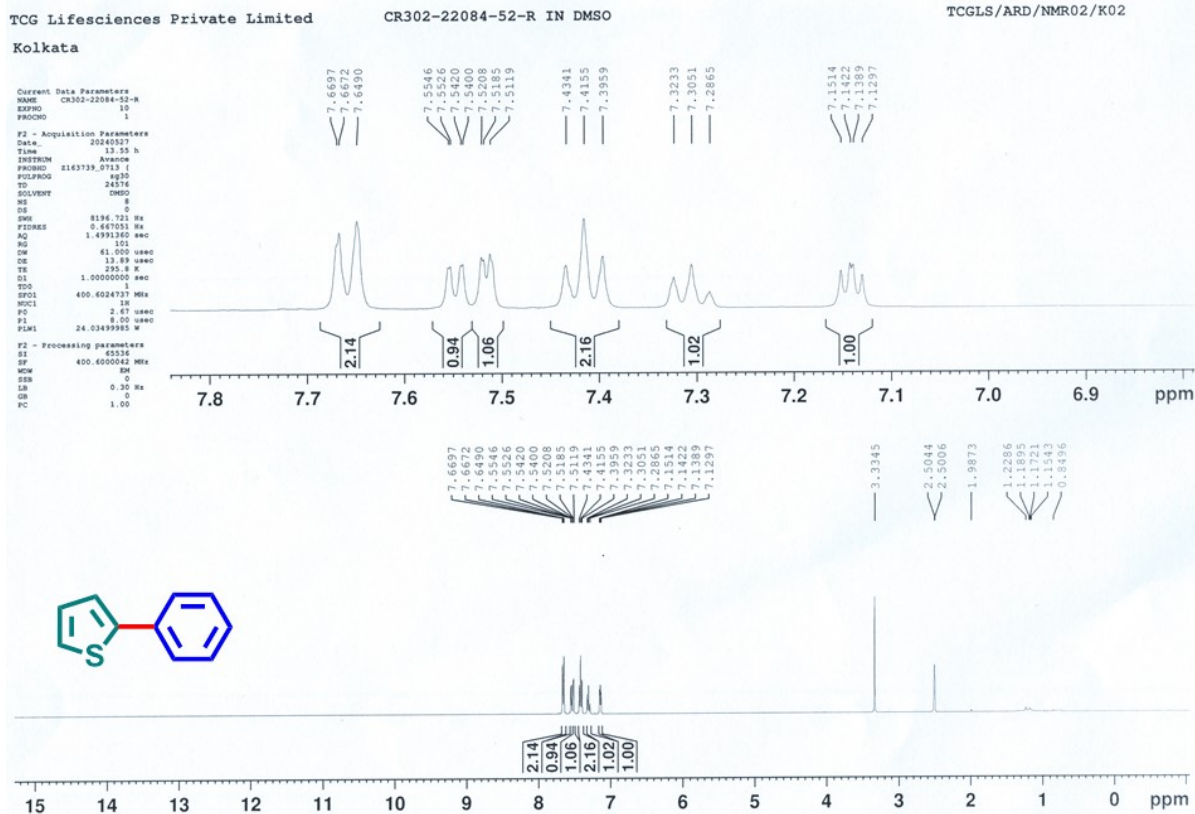

Figure S74:  $^1\text{H}$  NMR spectrum of 9a.

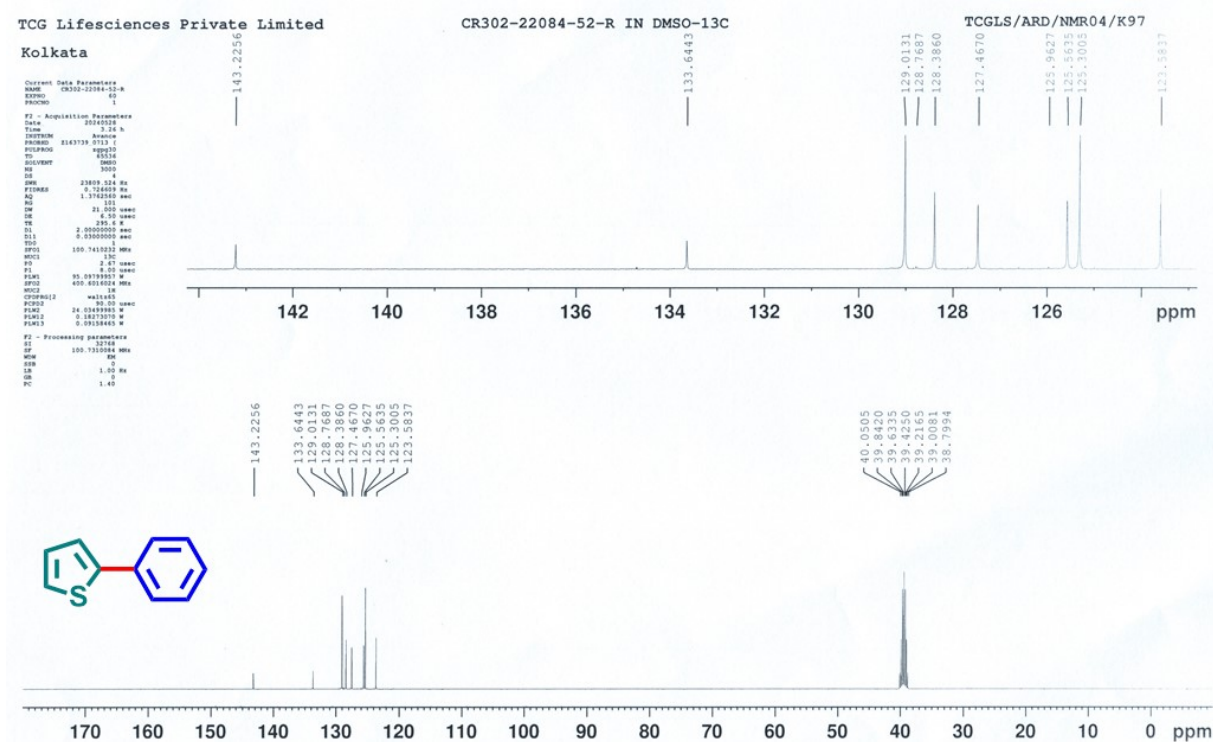

Figure S75:  $^{13}\text{C}$   $\{^1\text{H}\}$  NMR spectrum of 9a.



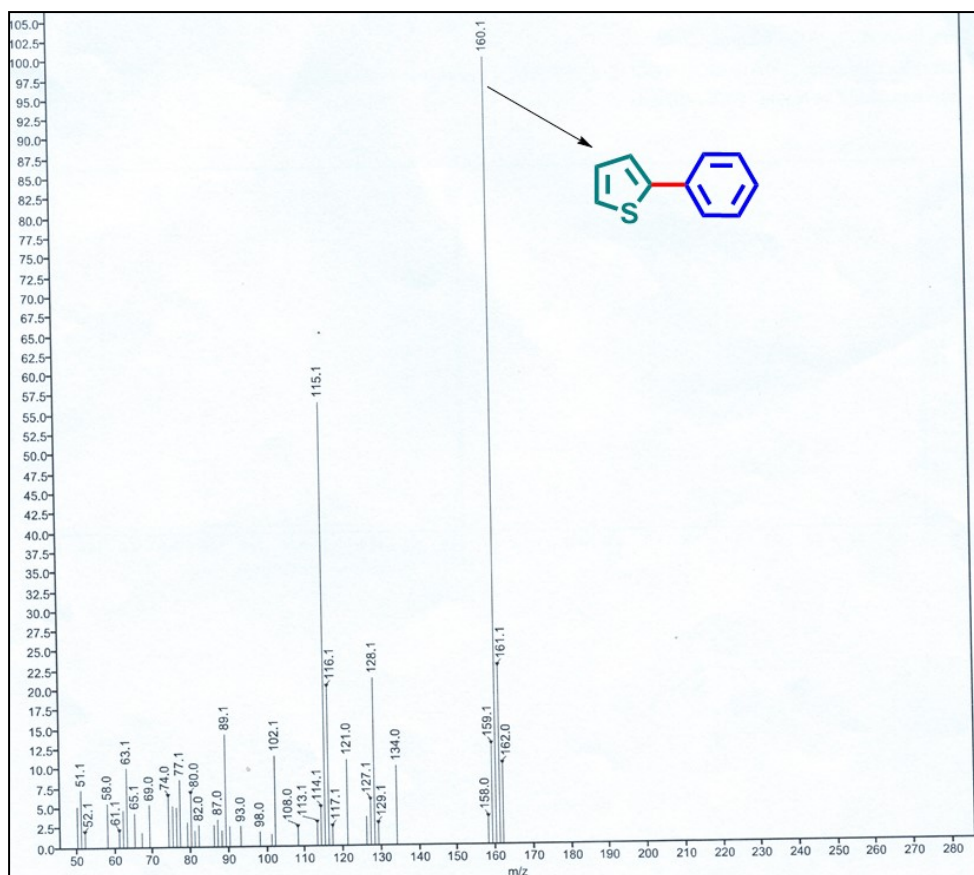

Figure S76: GC-MS spectrum of 9a.

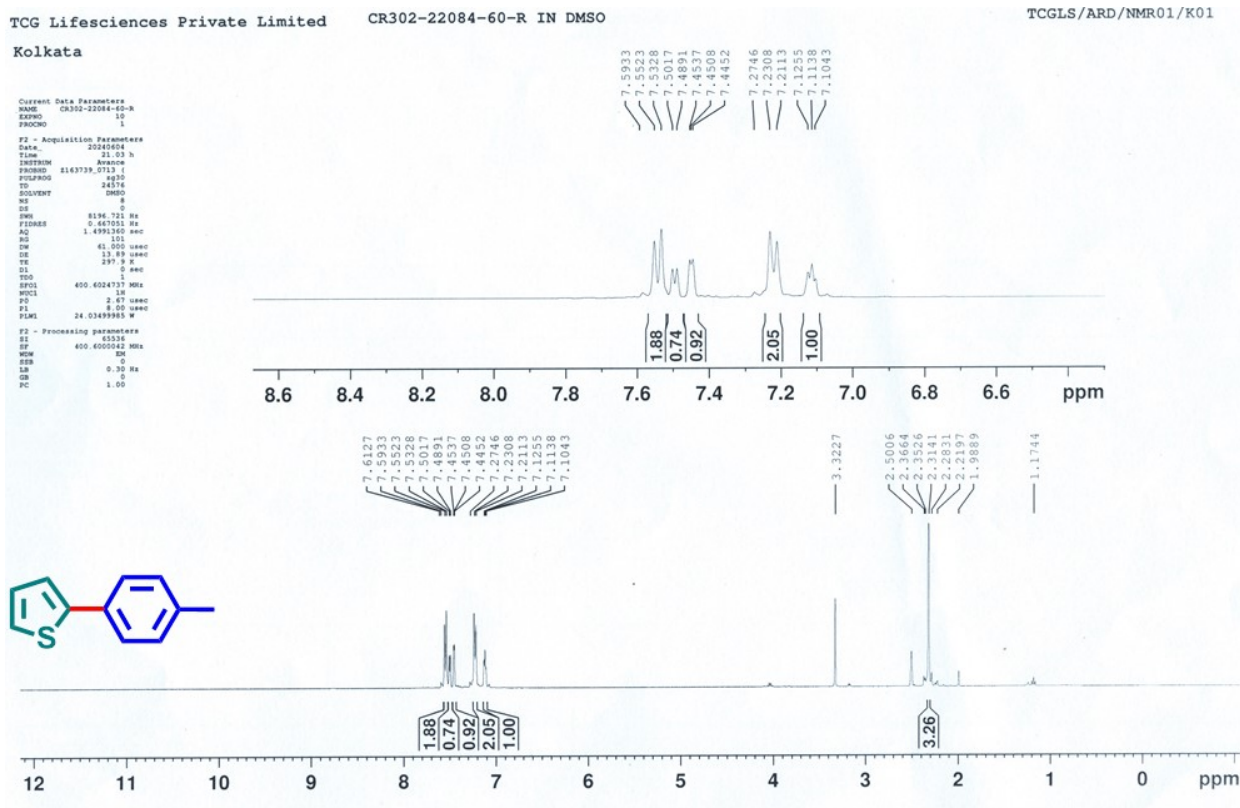

Figure S77: <sup>1</sup>H NMR spectrum of 9b.

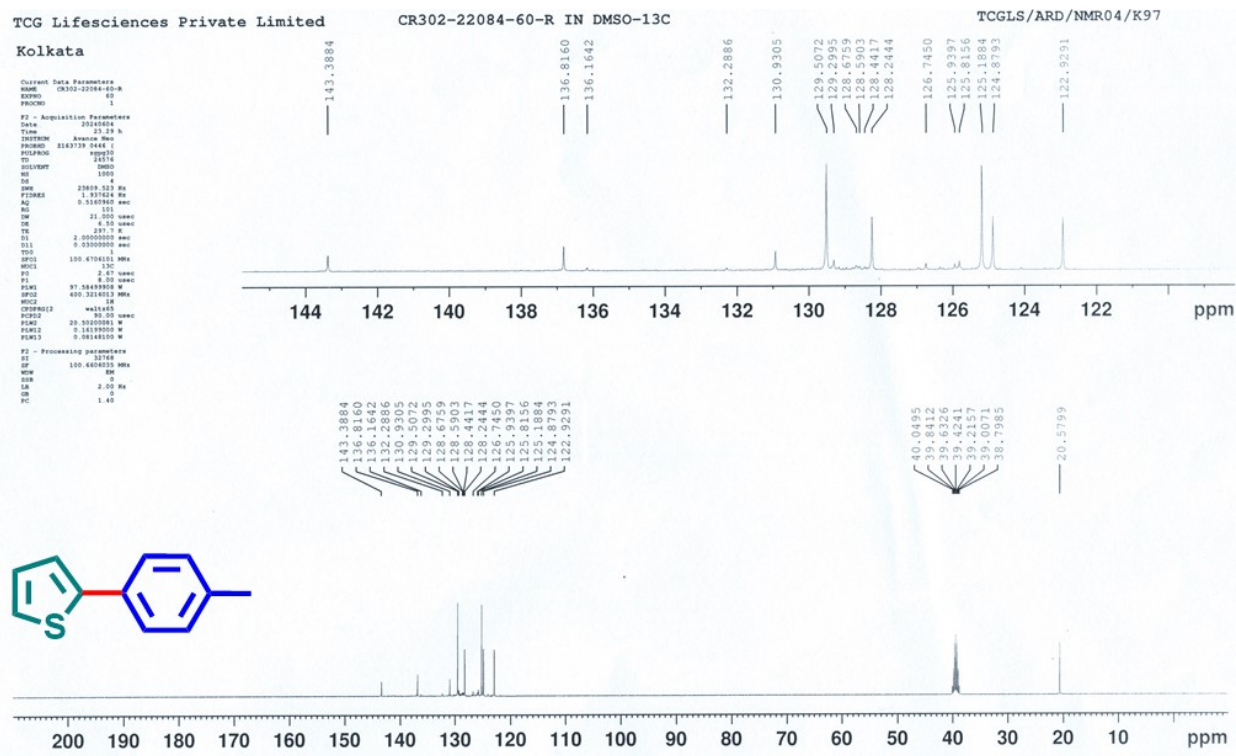

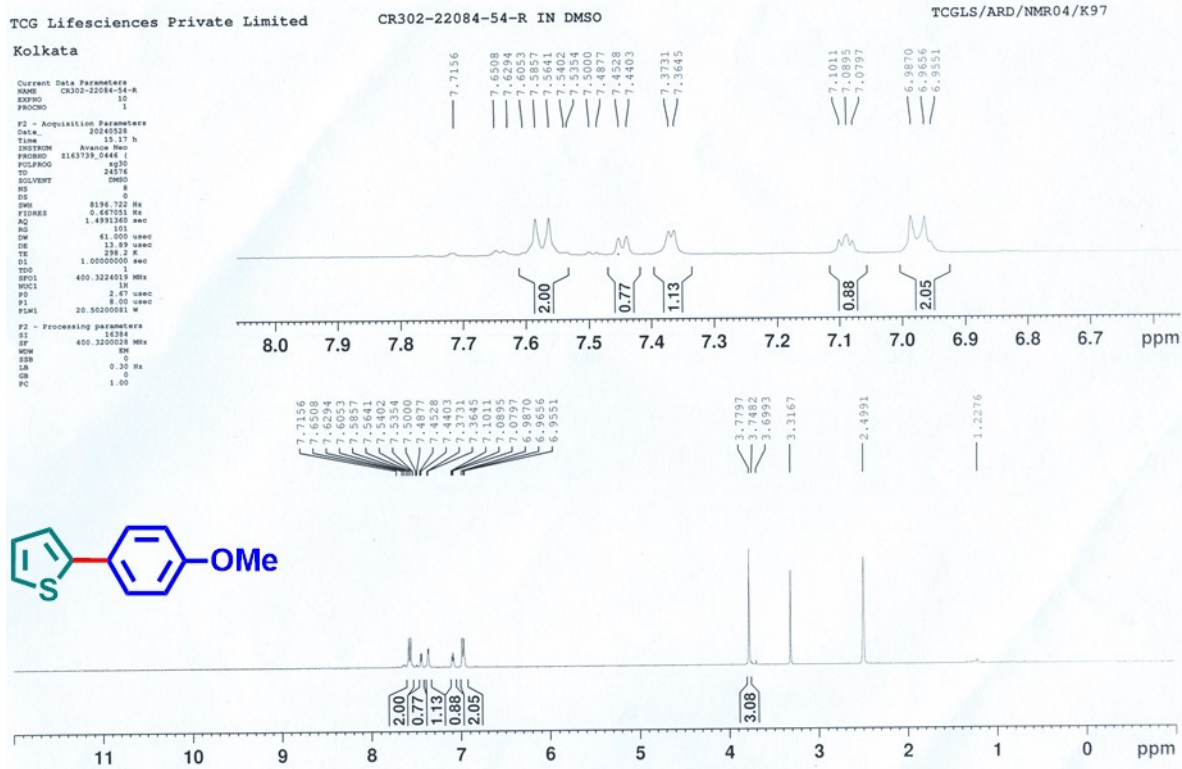

Figure S80:  $^1\text{H}$  NMR spectrum of 9c.

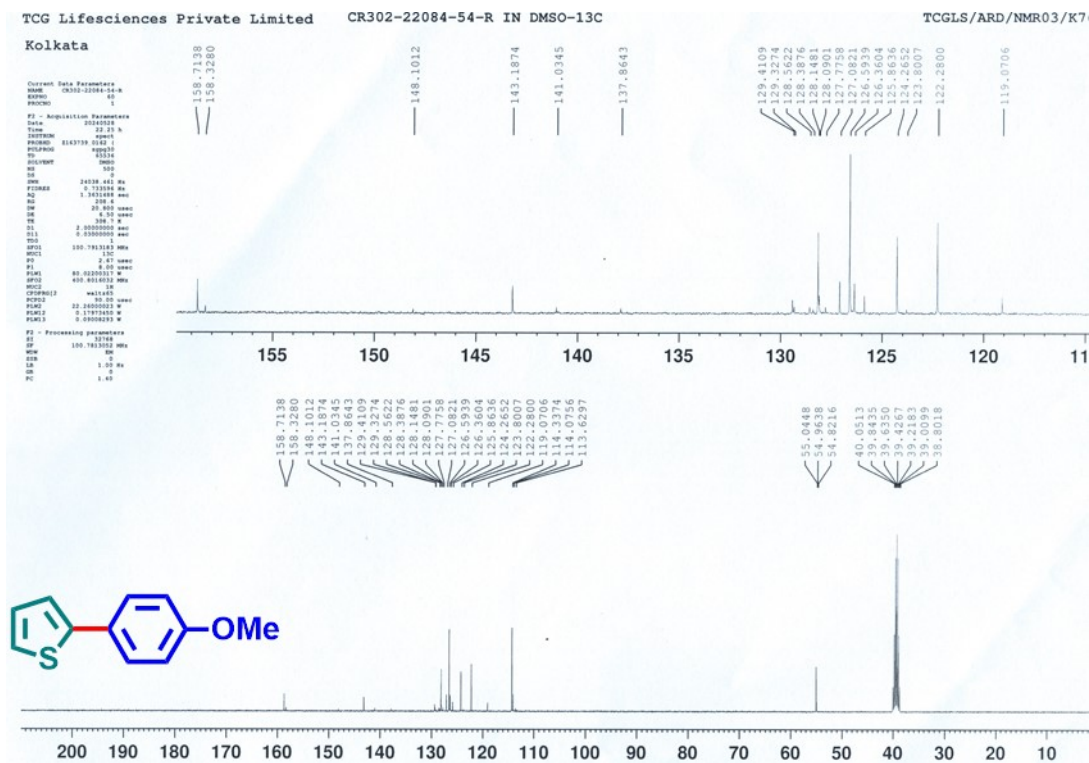

Figure S81:  $^{13}\text{C}$   $\{^1\text{H}\}$  NMR spectrum of 9c.



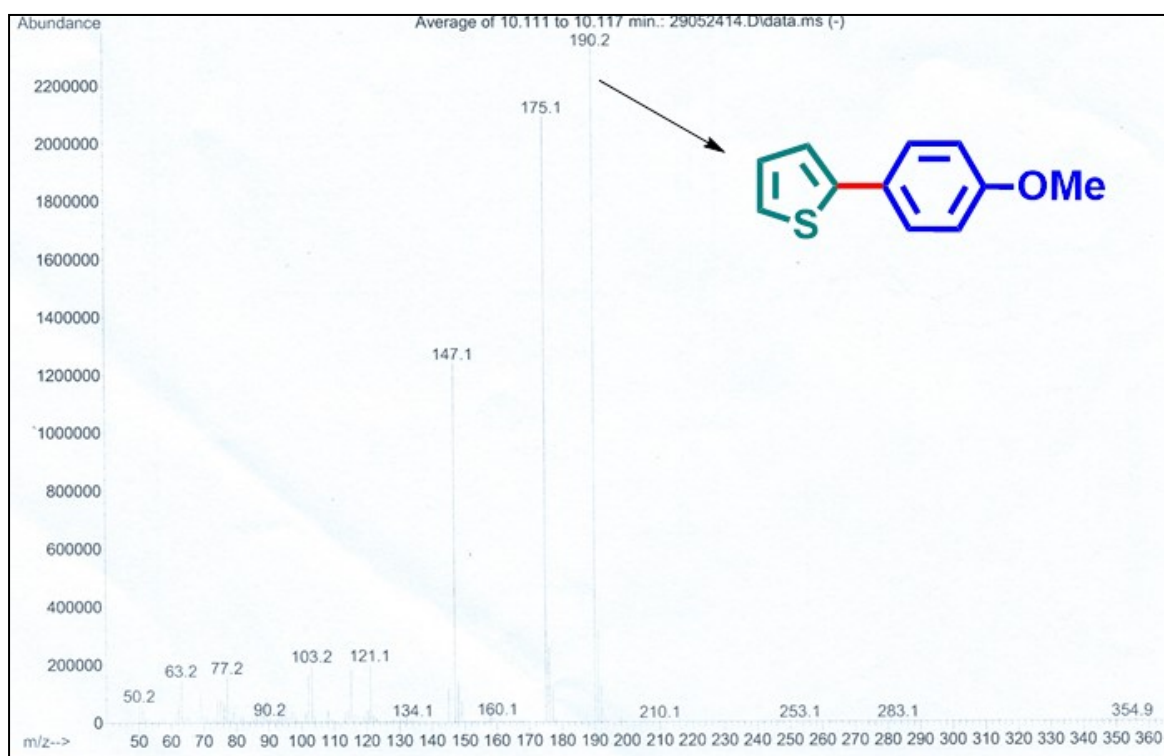

Figure S82: GC-MS spectrum of 9c.

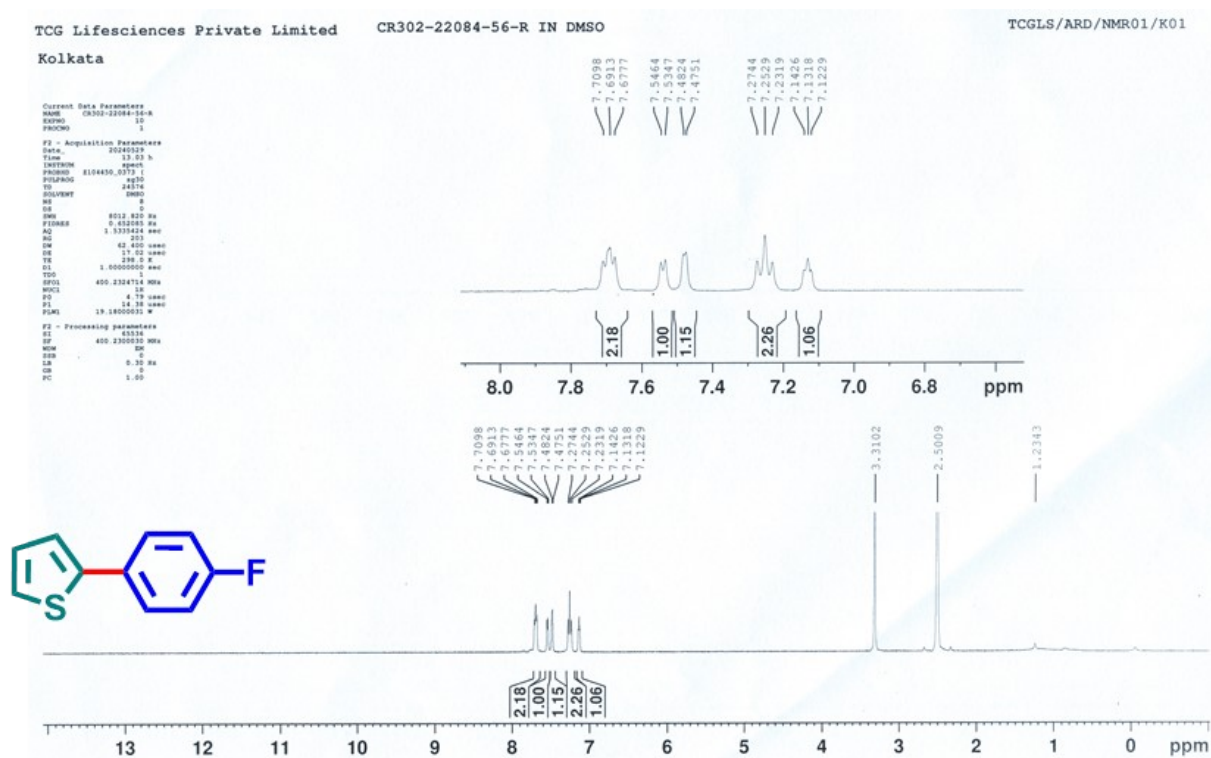

Figure S83: <sup>1</sup>H NMR spectrum of 9d.



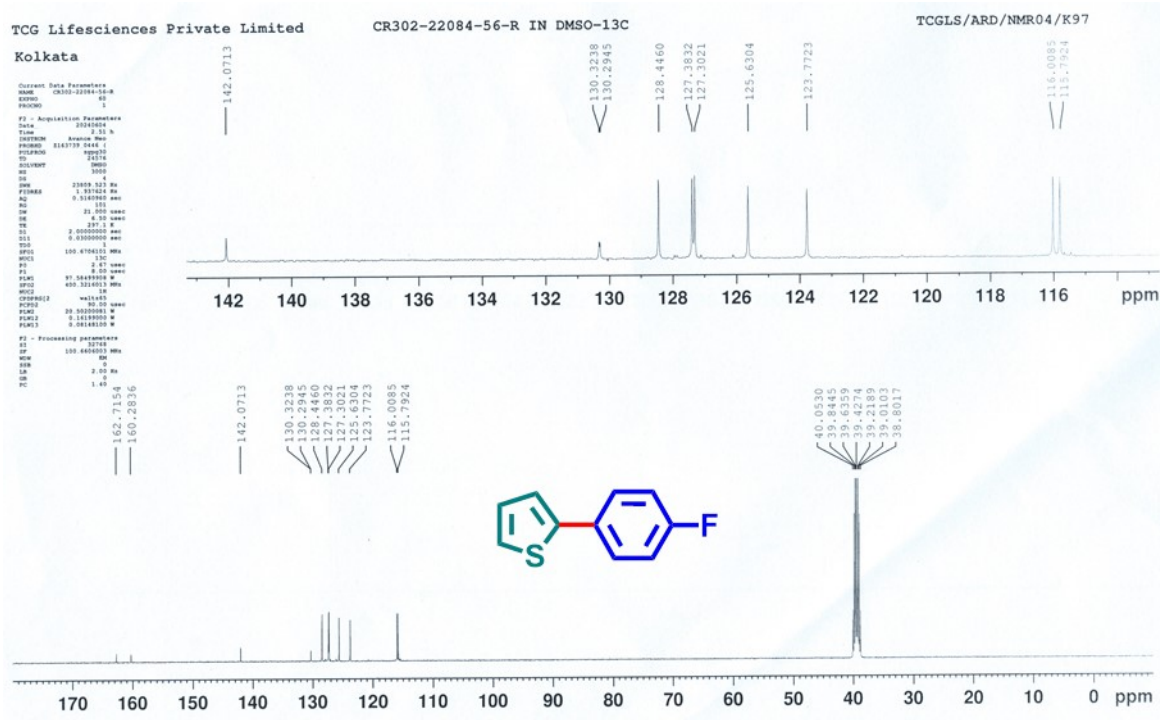

Figure S84:  $^{13}\text{C} \{^1\text{H}\}$  NMR spectrum of 9d.

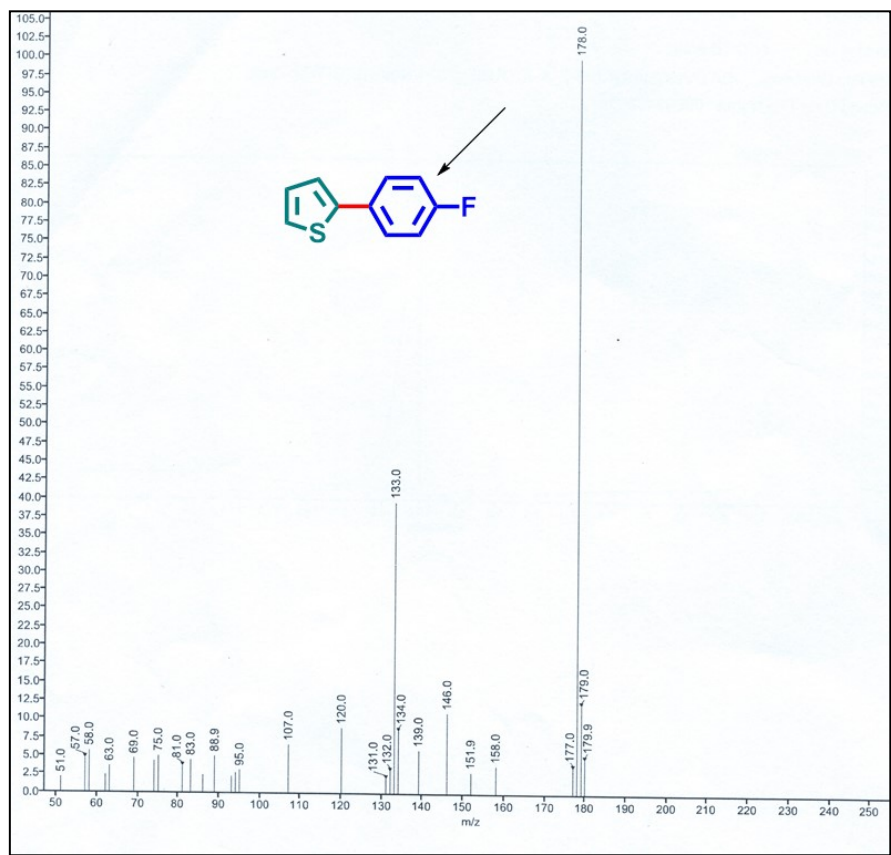

Figure S85: GC-MS spectrum of 9d.

Kolkata

Current Data Parameters  
 NAME CR302-22084-64-R  
 EXPNO 1  
 PROCNO 1  
 F2 - Acquisition Parameters  
 Date\_ 20220210  
 Time 17:05 h  
 INSTRUM spect  
 PROCNO 2163739\_0733 1  
 PULPROG zgpg30  
 PG2PRG2 zgpg30  
 YD 24014  
 SOLVENT DMSO  
 NS 8  
 DS 8  
 SWH 8196.721 Hz  
 FIDRES 0.461051 Hz  
 AQ 1.492160 sec  
 RG 101  
 TD 61  
 SFO 61.000 MHz  
 DE 11.89 umso  
 TE 297.6 K  
 D1 0 sec  
 TSD1 400.4004733 MHz  
 NUC1 13C  
 P1 2.67 umso  
 PL1 0.00 MHz  
 PL12 24.02499985 W  
 F2 - Processing parameters  
 SI 65334  
 SF 400.6000042 MHz  
 NCV 500  
 ISF 0  
 LA 0.30 Hz  
 GB 0  
 OR 1.00

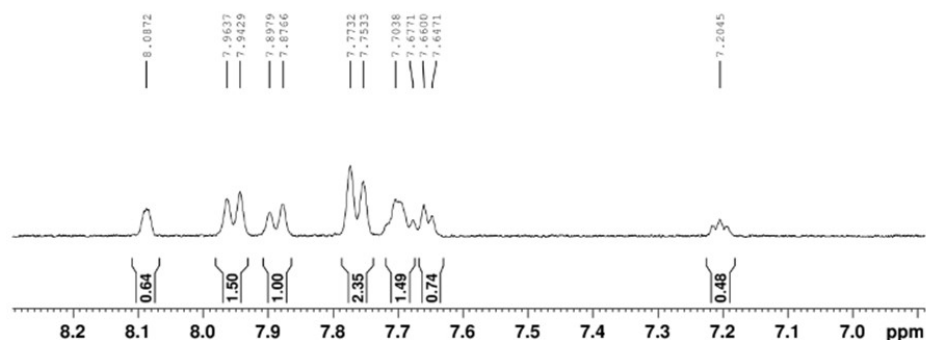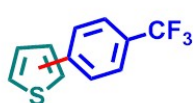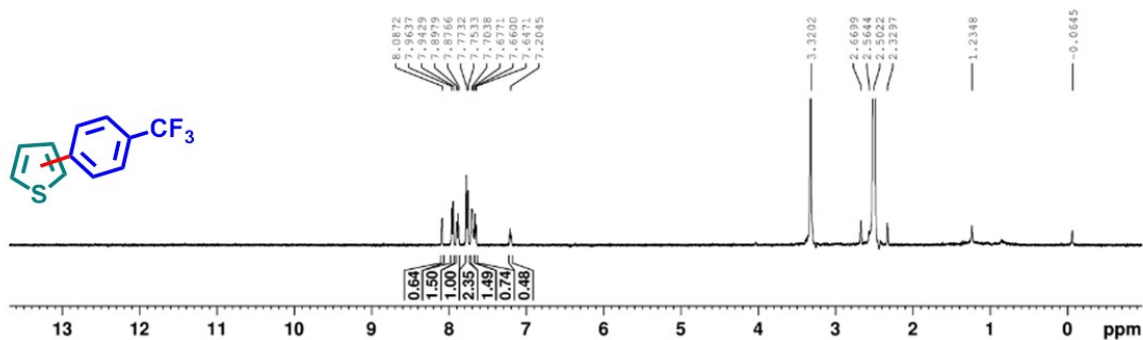Figure S86:  $^1\text{H}$  NMR spectrum of **9e**.

Kolkata

Current Data Parameters  
 NAME CR302-22084-64-R  
 EXPNO 1  
 PROCNO 1  
 F2 - Acquisition Parameters  
 Date\_ 20220210  
 Time 2:02 h  
 INSTRUM spect  
 PROCNO 2163739\_0733 1  
 PULPROG zgpg30  
 PG2PRG2 zgpg30  
 YD 24014  
 SOLVENT DMSO  
 NS 8  
 DS 8  
 SWH 9126.528 Hz  
 FIDRES 0.1762001 Hz  
 AQ 1.3762001 sec  
 RG 101  
 TD 61  
 SFO 61.000 MHz  
 DE 11.89 umso  
 TE 297.6 K  
 D1 0 sec  
 TSD1 400.6000042 MHz  
 NUC1 13C  
 P1 2.67 umso  
 PL1 0.00 MHz  
 PL12 24.02499985 W  
 F2 - Processing parameters  
 SI 65334  
 SF 400.6000042 MHz  
 NCV 500  
 ISF 0  
 LA 0.30 Hz  
 GB 0  
 OR 1.00

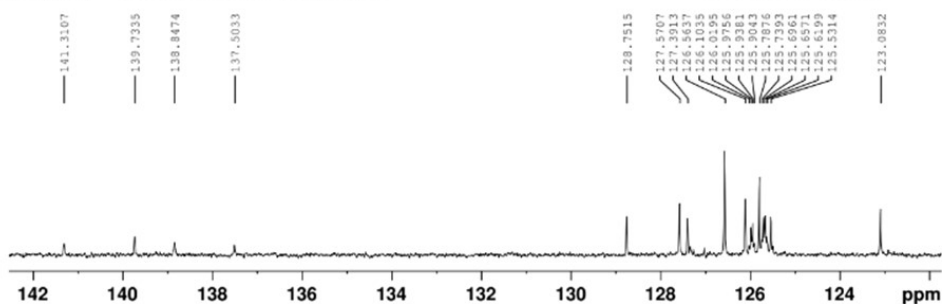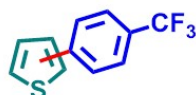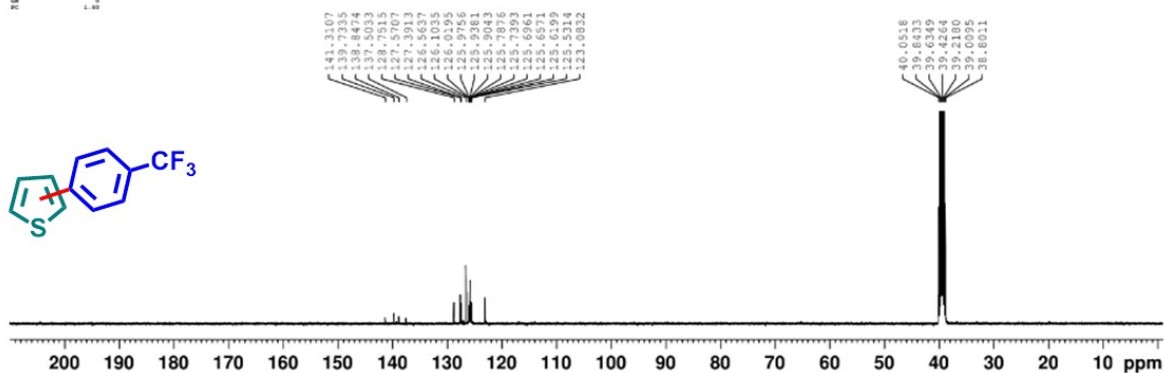Figure S87:  $^{13}\text{C}$   $\{^1\text{H}\}$  NMR spectrum of **9e**.

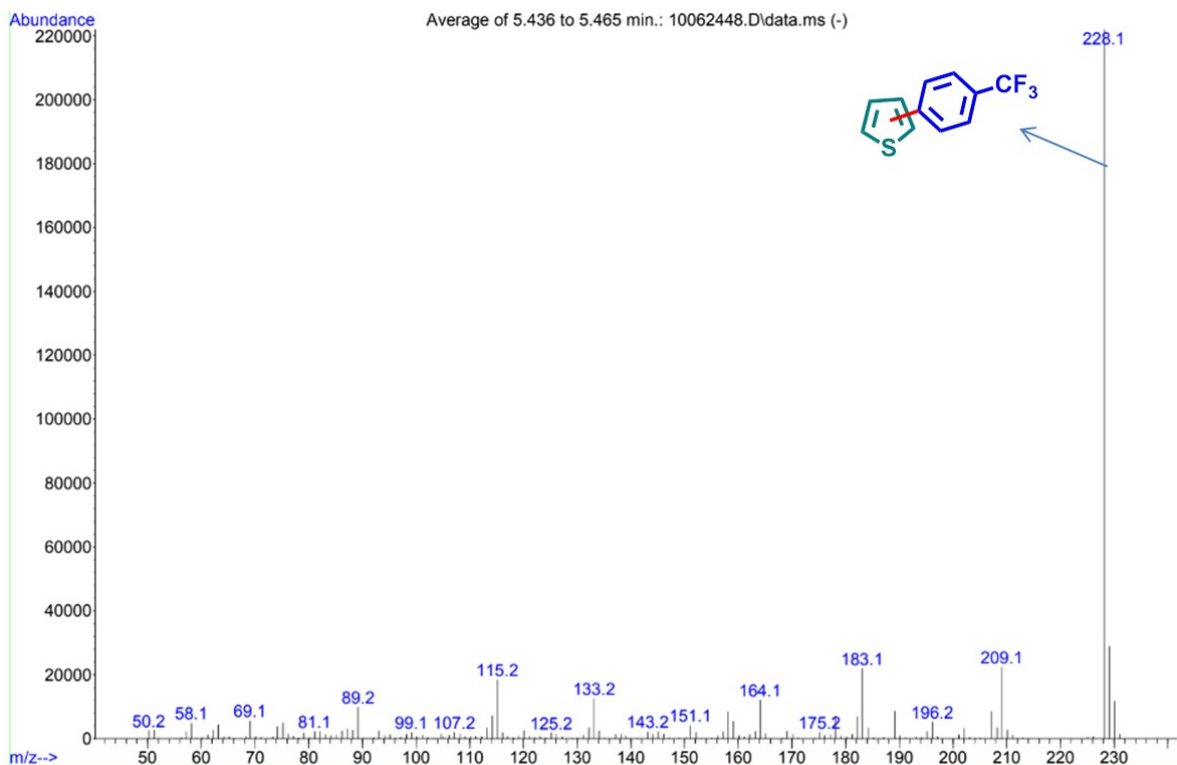

Figure S88: GC-MS spectrum of 9e.

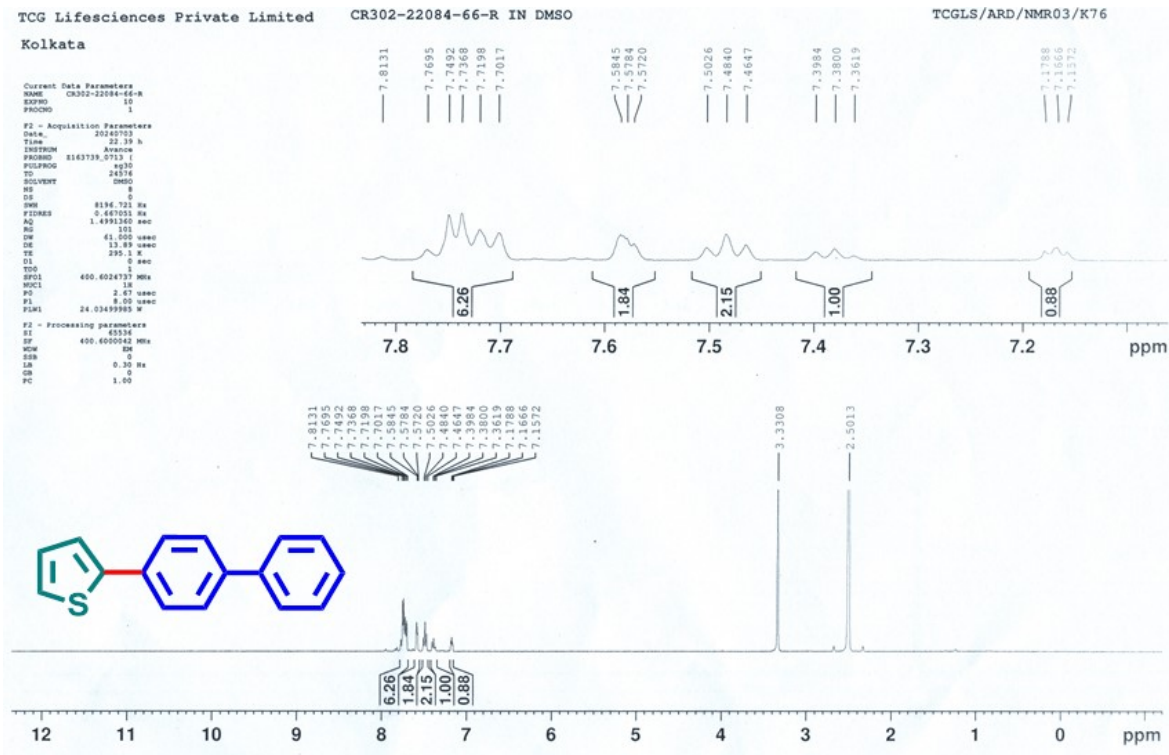

Figure S89: <sup>1</sup>H NMR spectrum of 9f.





Kolkata

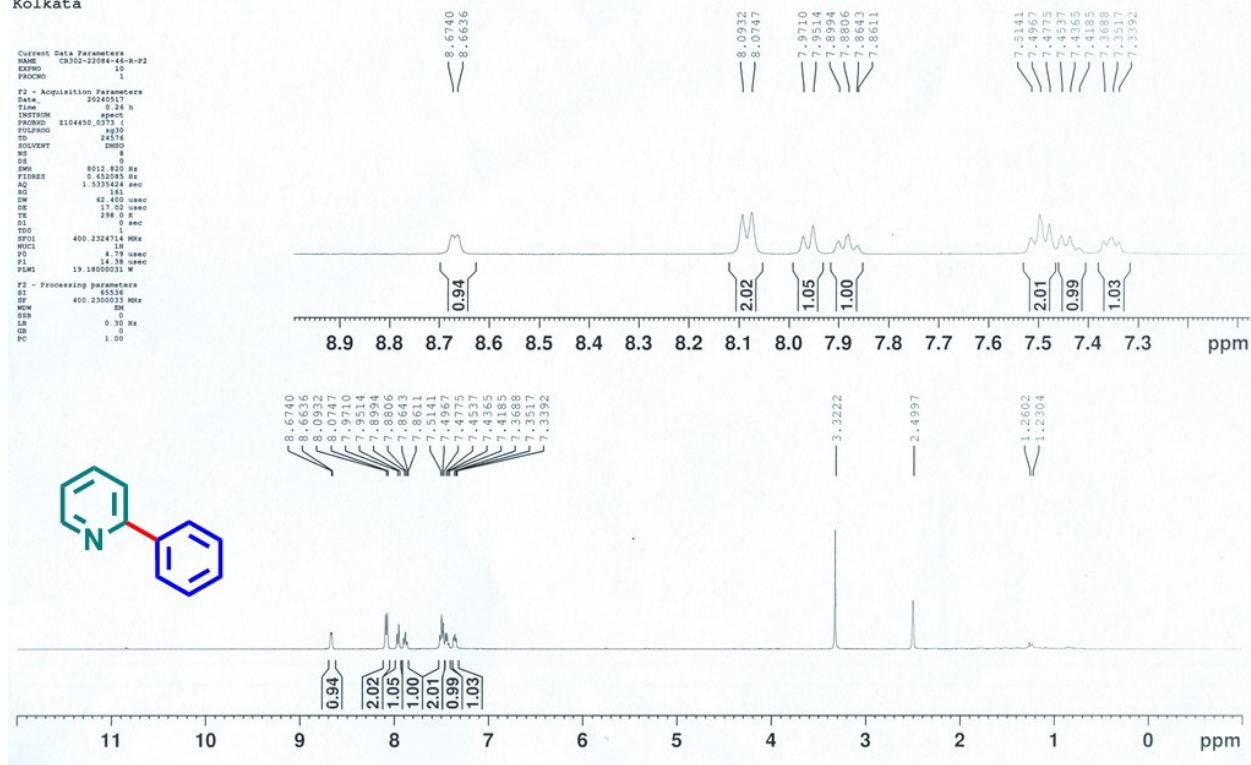Figure S92:  $^1\text{H}$  NMR spectrum of 9g.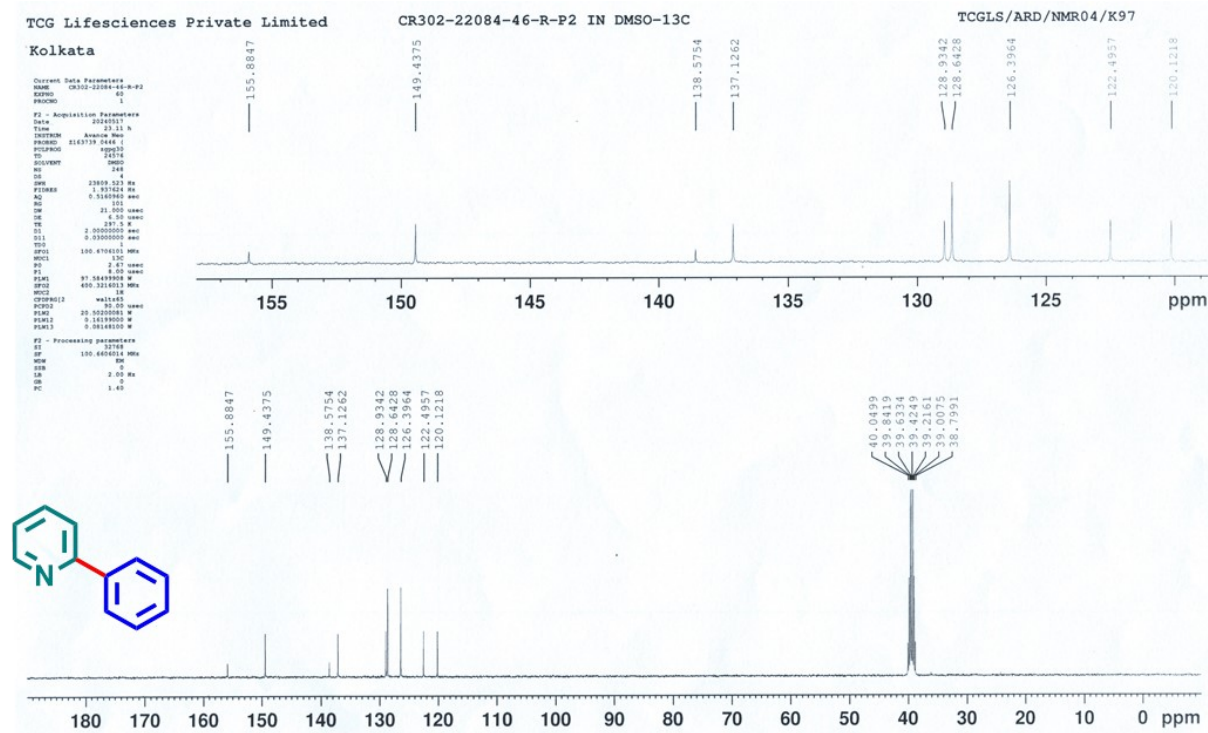Figure S93:  $^{13}\text{C}$   $\{^1\text{H}\}$  NMR spectrum of 9g.

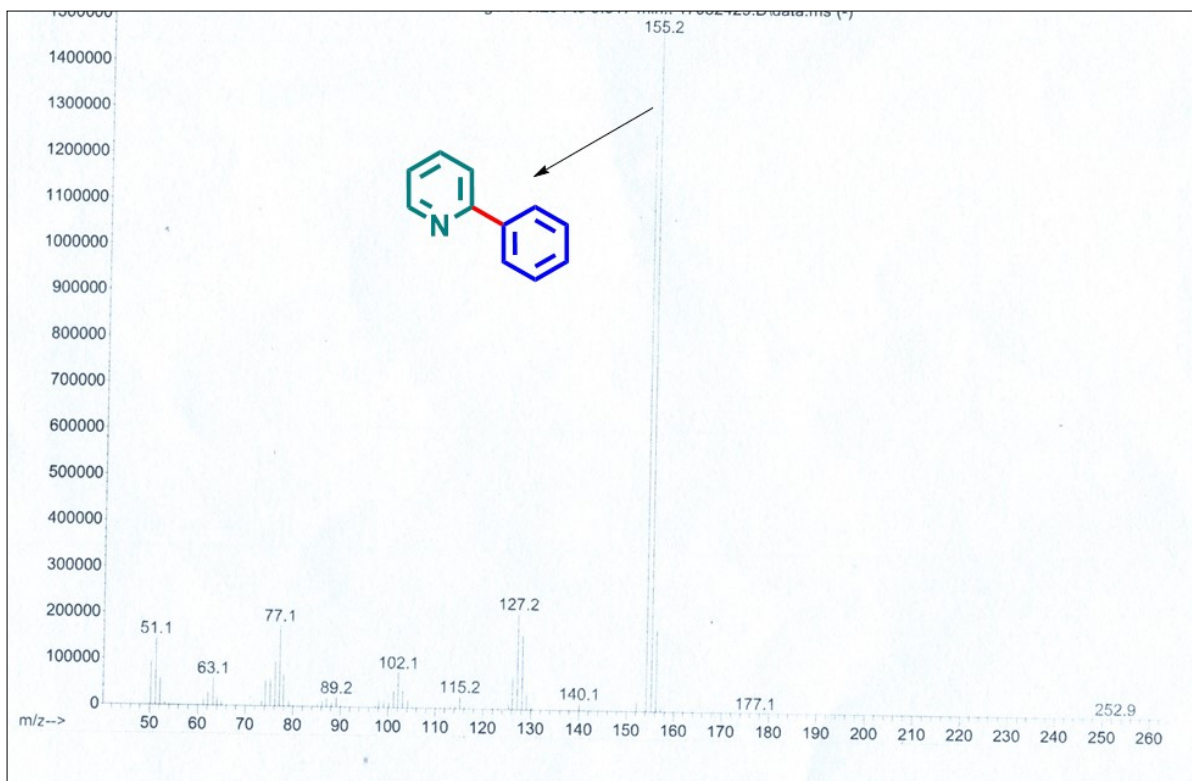

Figure S94: GC-MS spectrum of 9g.

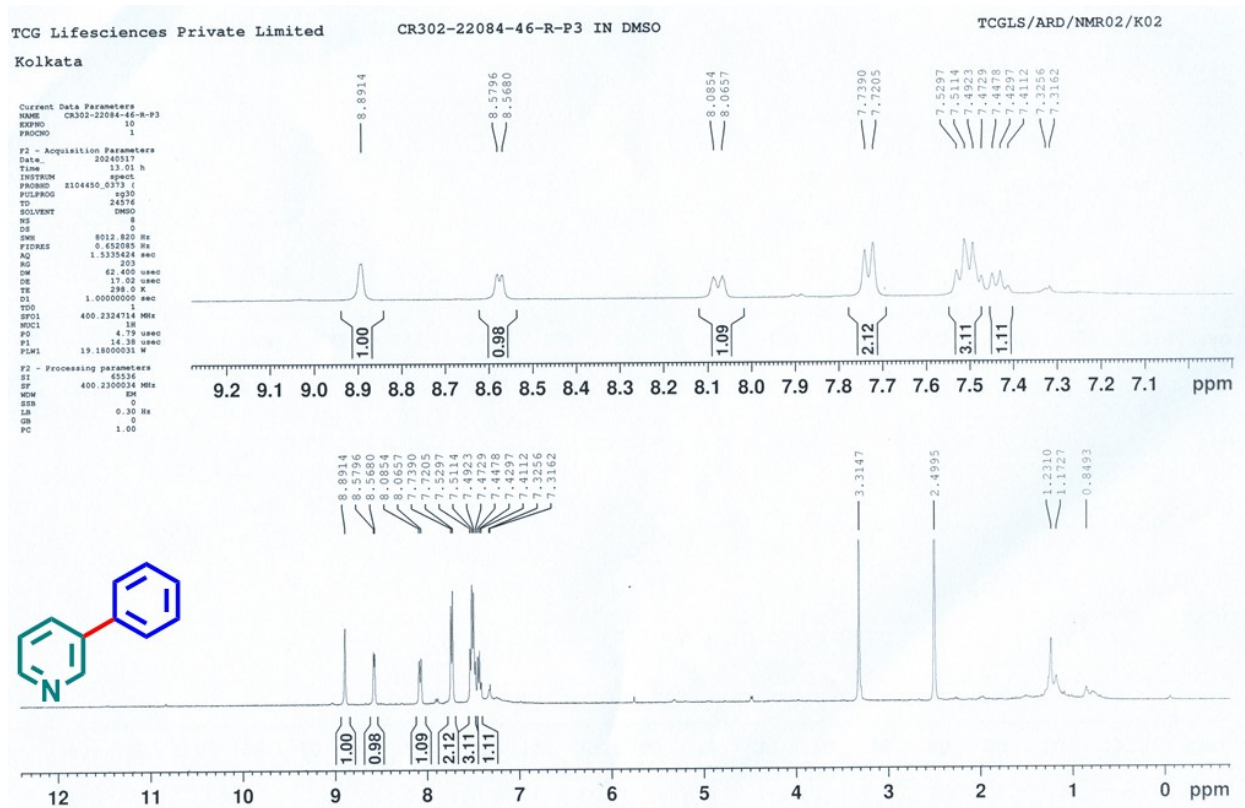

Figure S95: <sup>1</sup>H NMR spectrum of 9g.





```

Current Data Parameters
NAME CR302-22084-48-P2
EXPNO 10
PROCNO 1
F2 - Acquisition Parameters
Date_ 20240520
Time 14:08:51
INSTRUM Avance Neo
PROBHD 1H300-0445
PULPROG zgpg30
TD 65536
SOLVENT DMSO
NS 8
DS 4
SWH 8196.722 Hz
FIDRES 0.460703 Hz
AQ 1.4991360 sec
RG 101
DM 61.000 usec
DE 13.69 usec
TE 297.1 K
D1 1.0000000 sec
SFO1 400.3224013 MHz
NUC1 1H
PC 8.00 usec
P1 20.5020081 u
F2 - Processing parameters
SI 32768
SF 400.3224013 MHz
WDW EM
SSB 0
LB 0.30 Hz
GB 0
PC 1.00
    
```

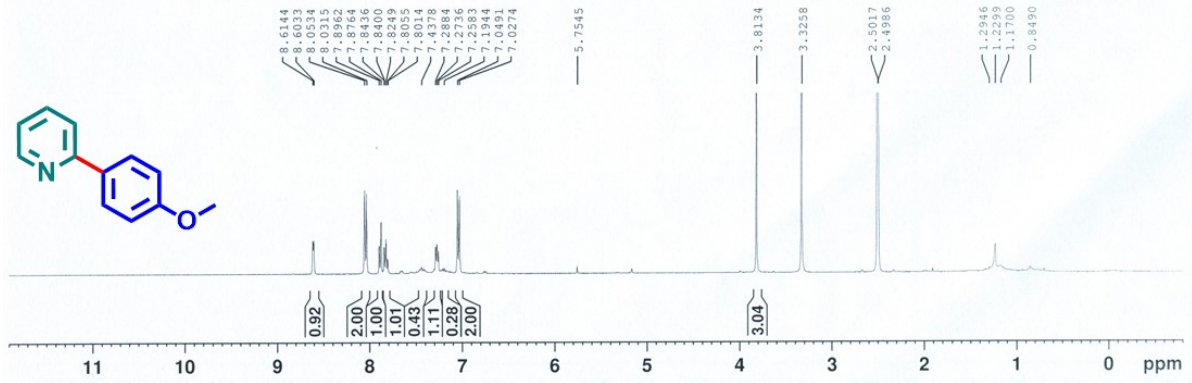

Figure S98: <sup>1</sup>H NMR spectrum of 9h.

```

Current Data Parameters
NAME CR302-22084-48-P2
EXPNO 1
PROCNO 1
F2 - Acquisition Parameters
Date_ 20240521
Time 23:32:58
INSTRUM spect
PROBHD 1H300-0445
PULPROG zgpg30
TD 65536
SOLVENT DMSO
NS 8
DS 4
SWH 24938.443 Hz
FIDRES 0.312104 Hz
AQ 1.3631488 sec
RG 101
DM 61.000 usec
DE 13.69 usec
TE 297.1 K
D1 1.0000000 sec
SFO1 100.7813333 MHz
NUC1 13C
PC 8.00 usec
P1 20.5020081 u
F2 - Processing parameters
SI 32768
SF 100.7813333 MHz
WDW EM
SSB 0
LB 1.00 Hz
GB 0
PC 1.00
    
```

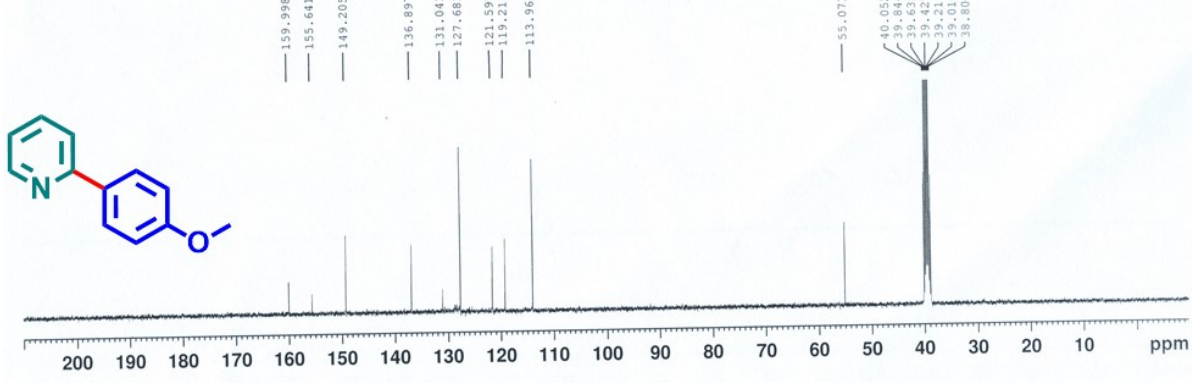

Figure S99: <sup>13</sup>C {<sup>1</sup>H} NMR spectrum of 9h.



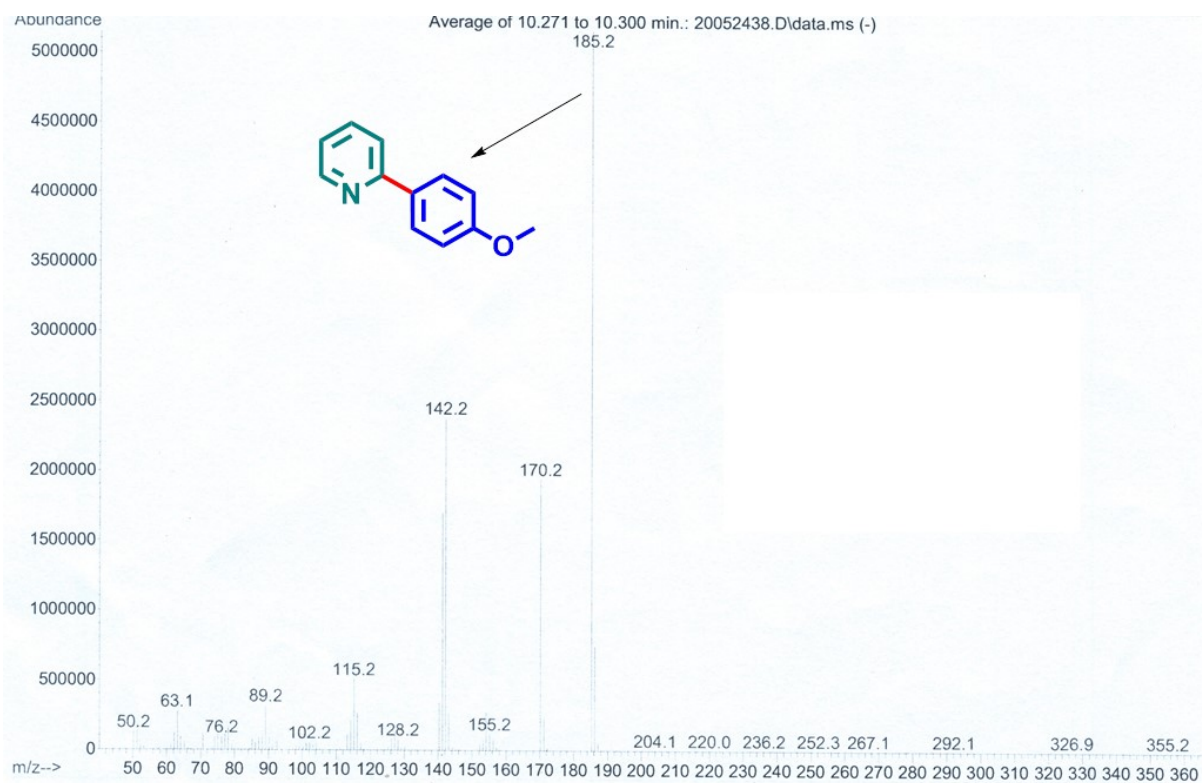

Figure S100: GC-MS spectrum of 9h.

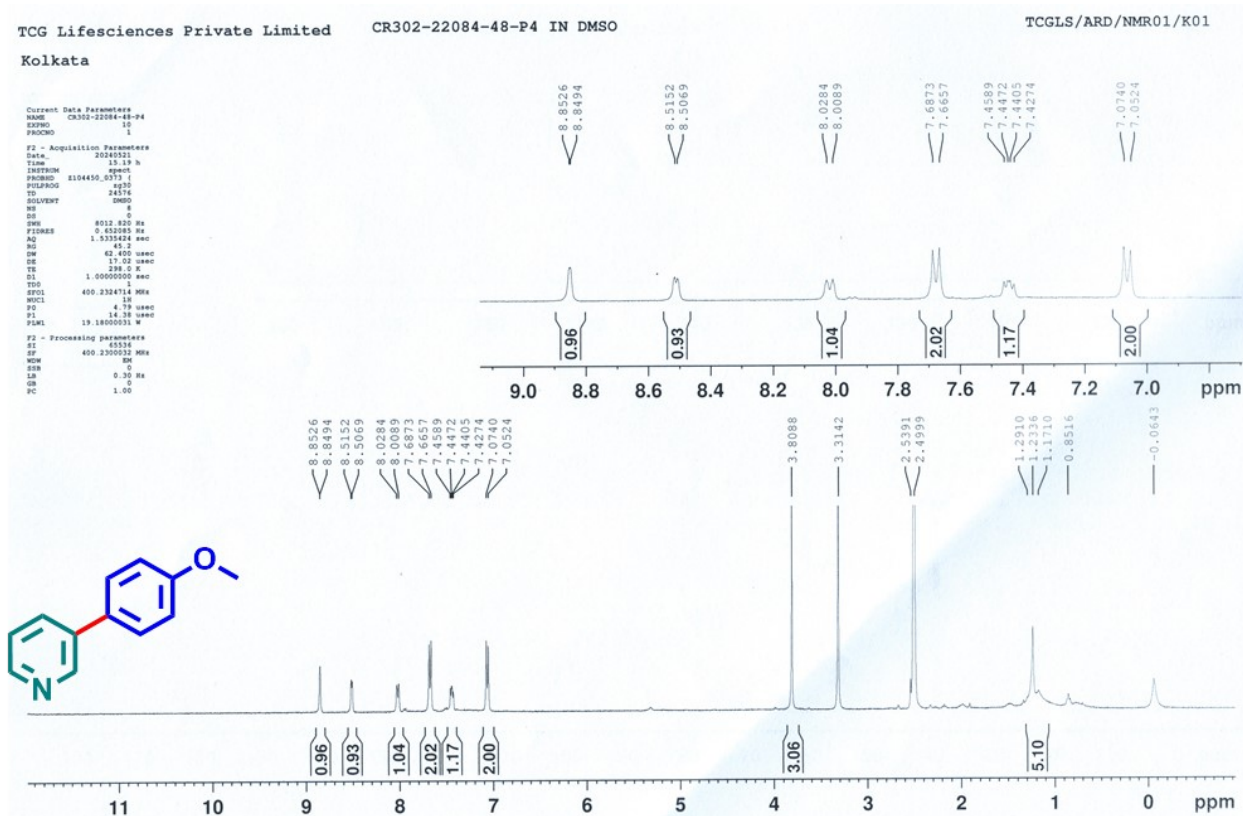

Figure S101:  $^1\text{H}$  NMR spectrum of 9h.



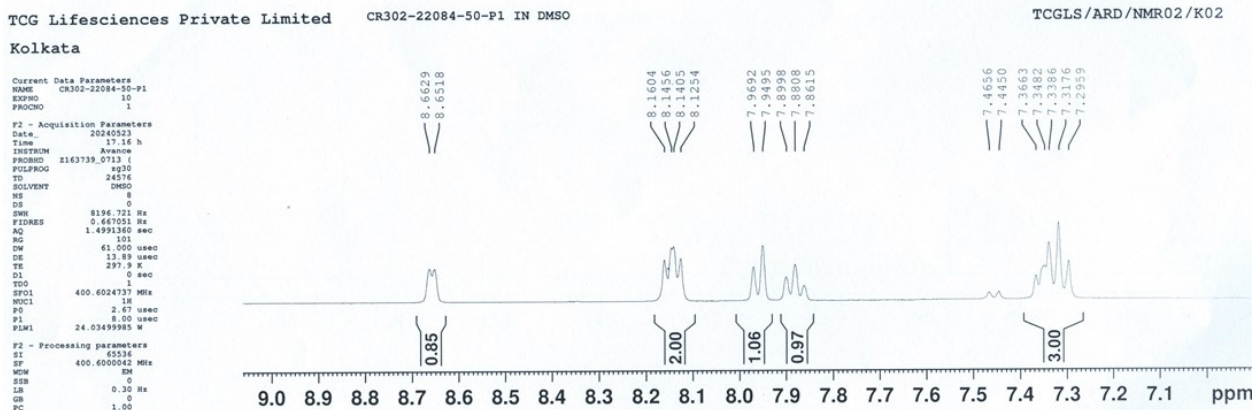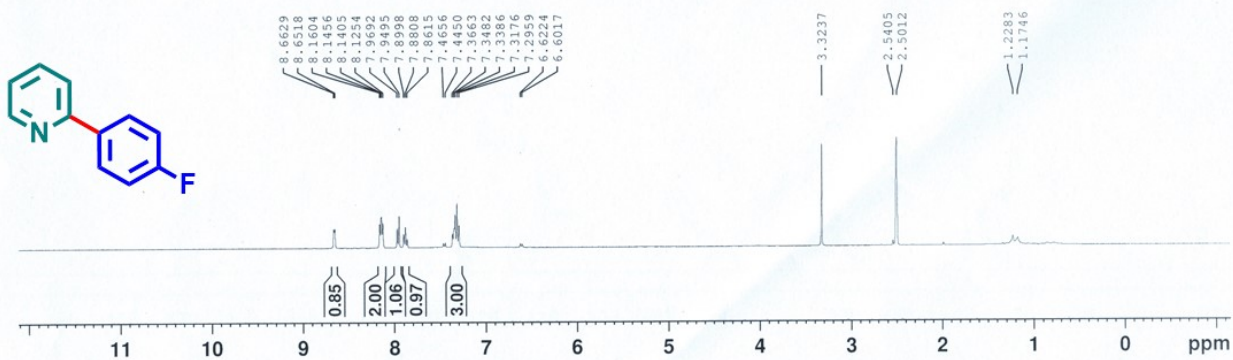

Figure S104: <sup>1</sup>H NMR spectrum of 9i.

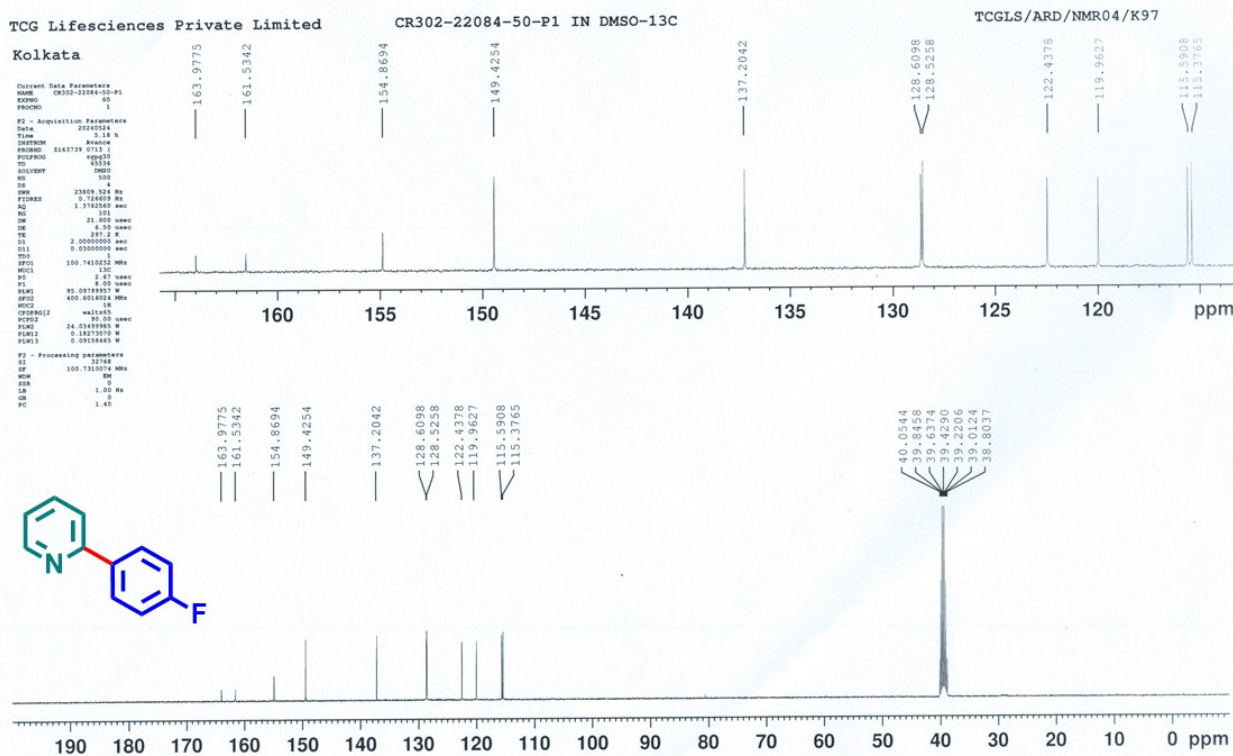

Figure S105: <sup>13</sup>C {<sup>1</sup>H} NMR spectrum of 9i.



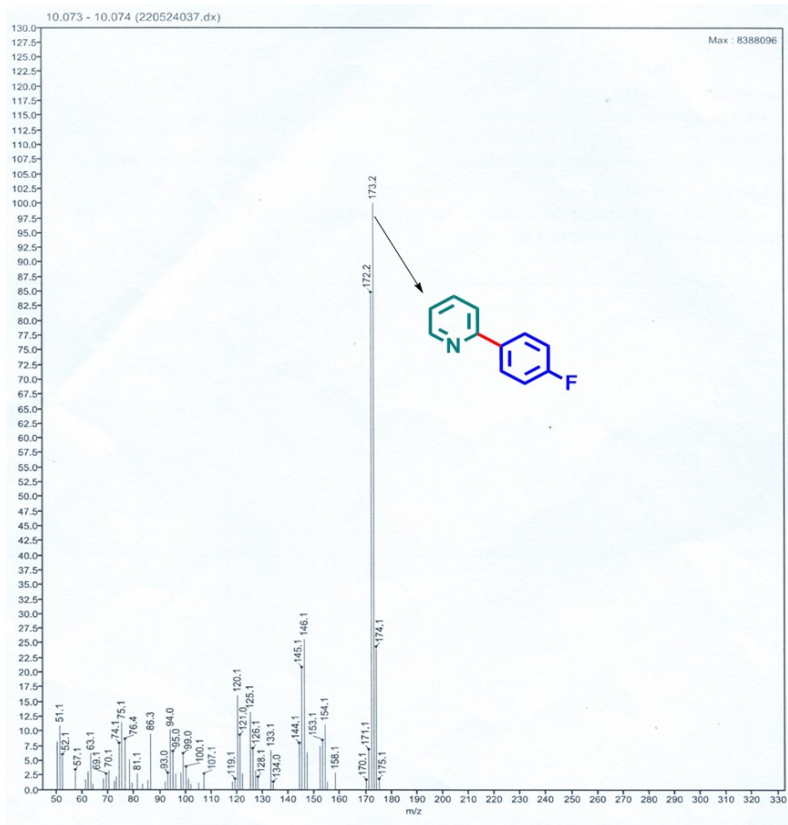

Figure S106: GC-MS spectrum of 9i.

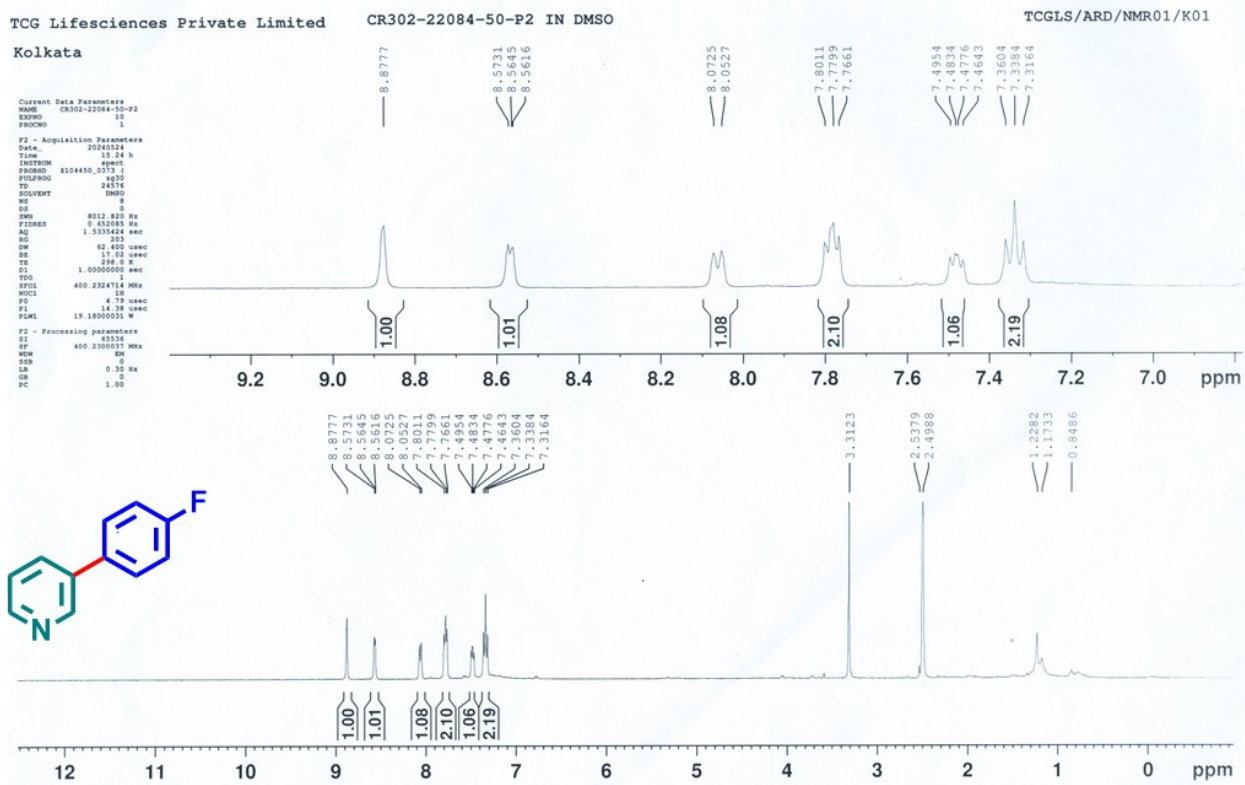

Figure S107: <sup>1</sup>H NMR spectrum of 9i.



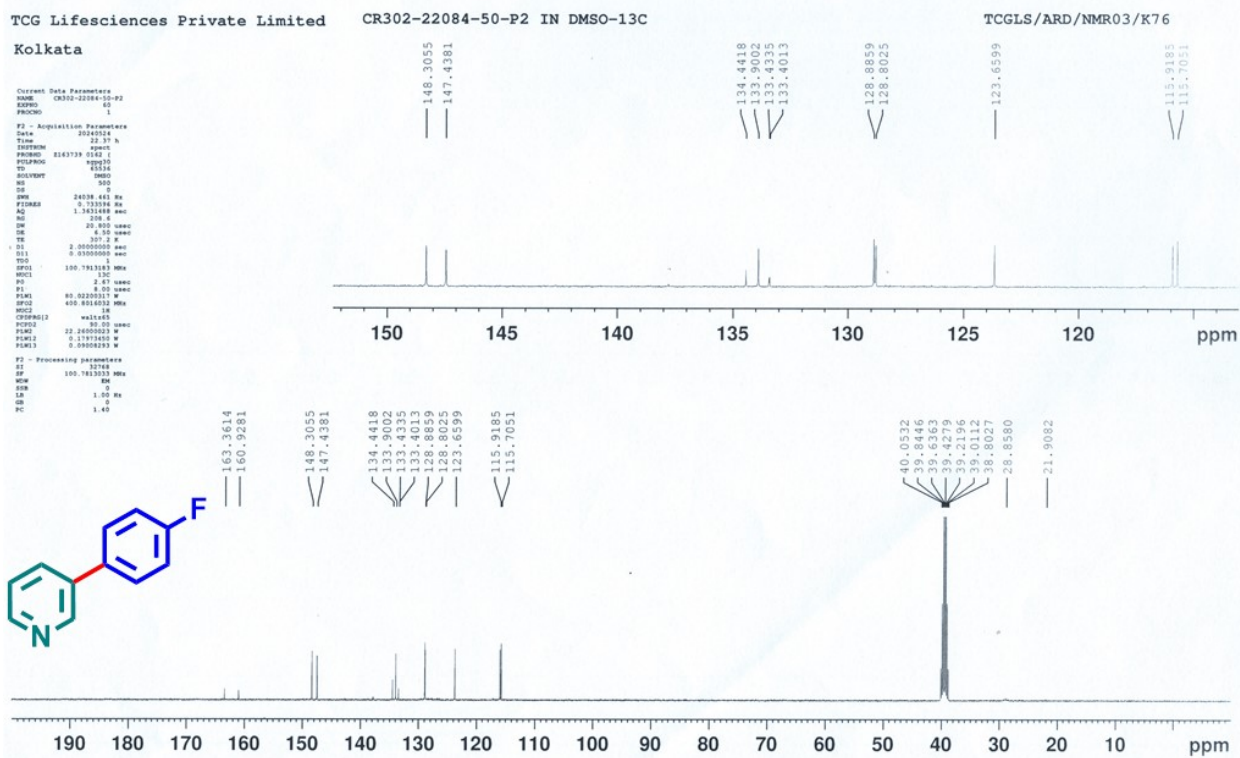

Figure S108:  $^{13}\text{C}$   $\{^1\text{H}\}$  NMR spectrum of **9i**.

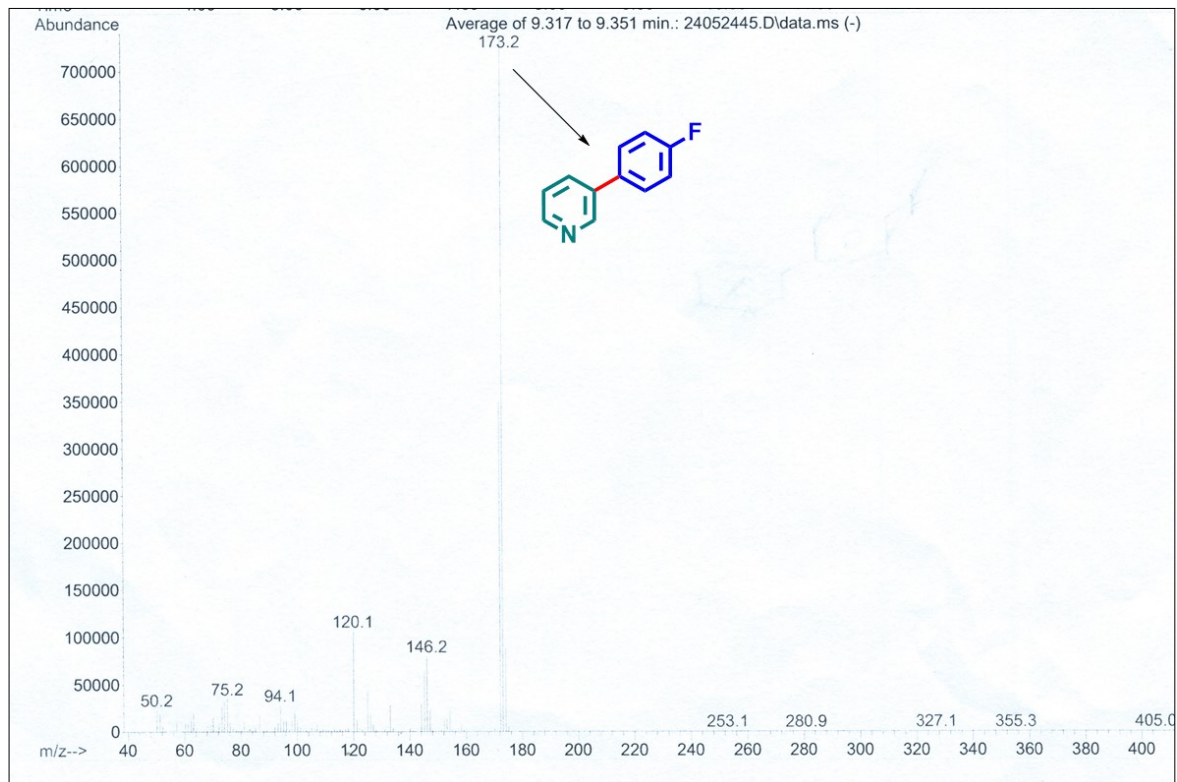

Figure S109: GC-MS spectrum of **9i**.

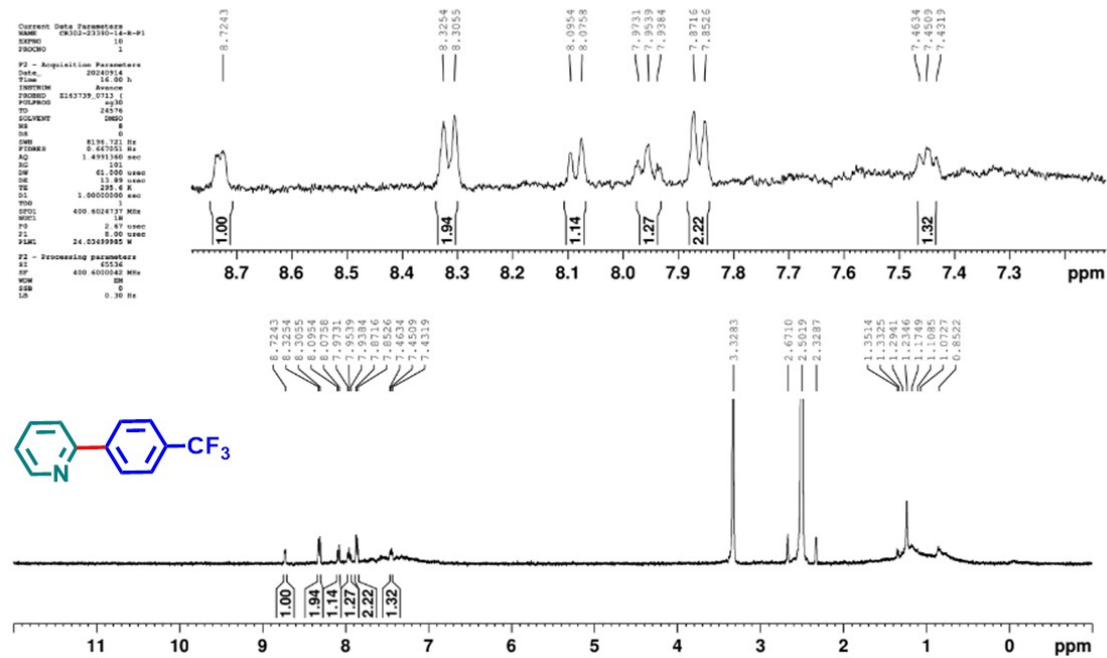

Figure S110: <sup>1</sup>H NMR spectrum of 9j.

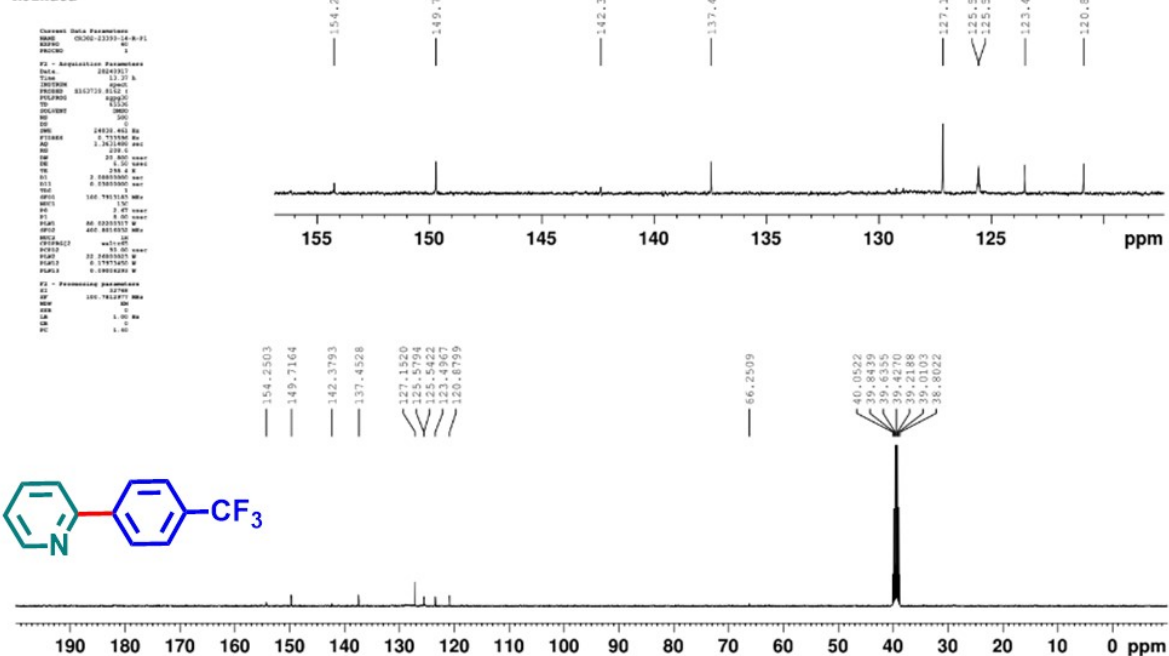

Figure S111: <sup>13</sup>C {<sup>1</sup>H} NMR spectrum of 9j.

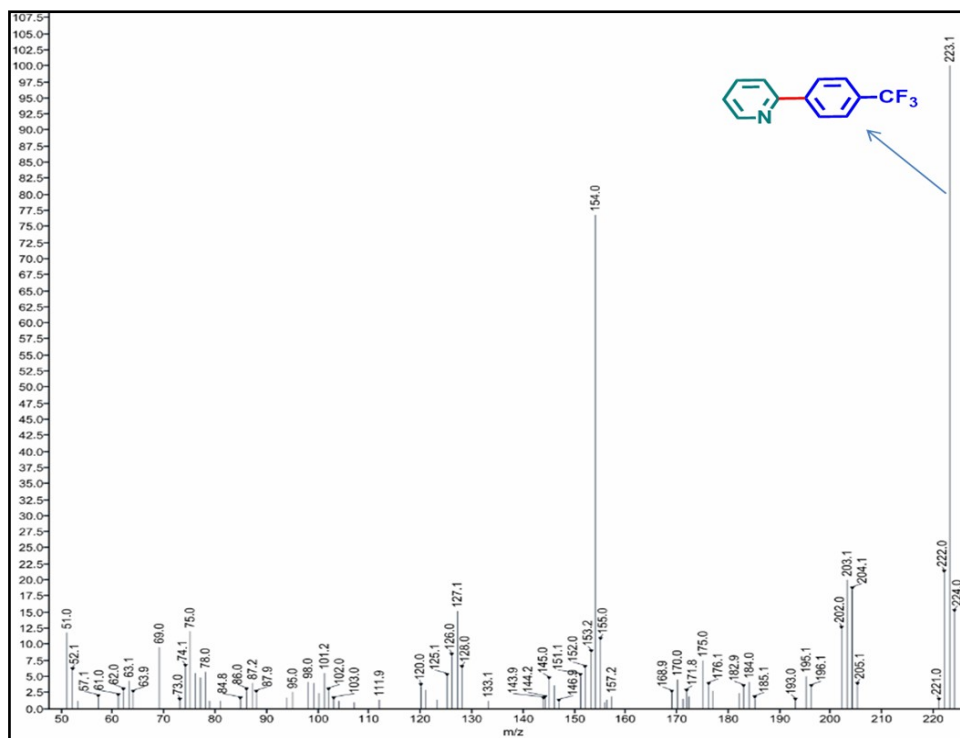

Figure S112: GC-MS spectrum of 9j.

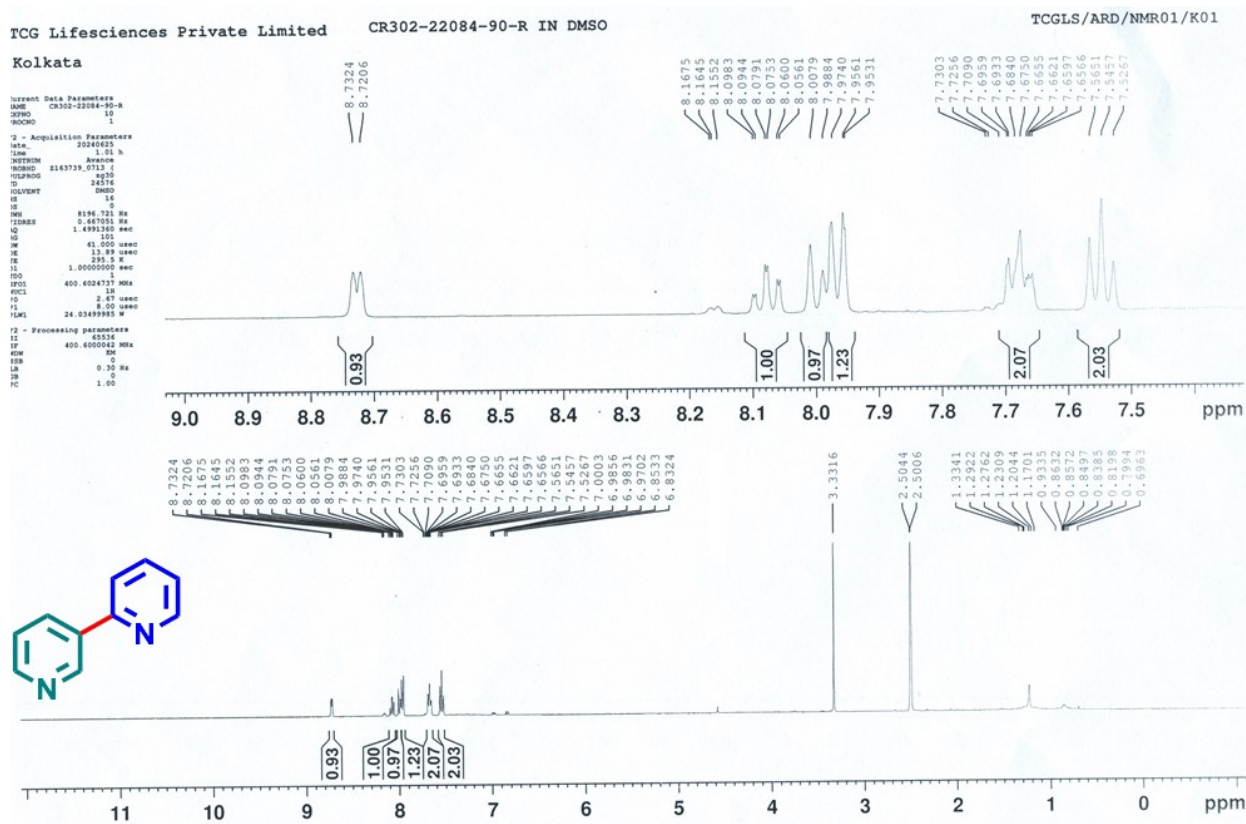

Figure S113: <sup>1</sup>H NMR spectrum of 9k.



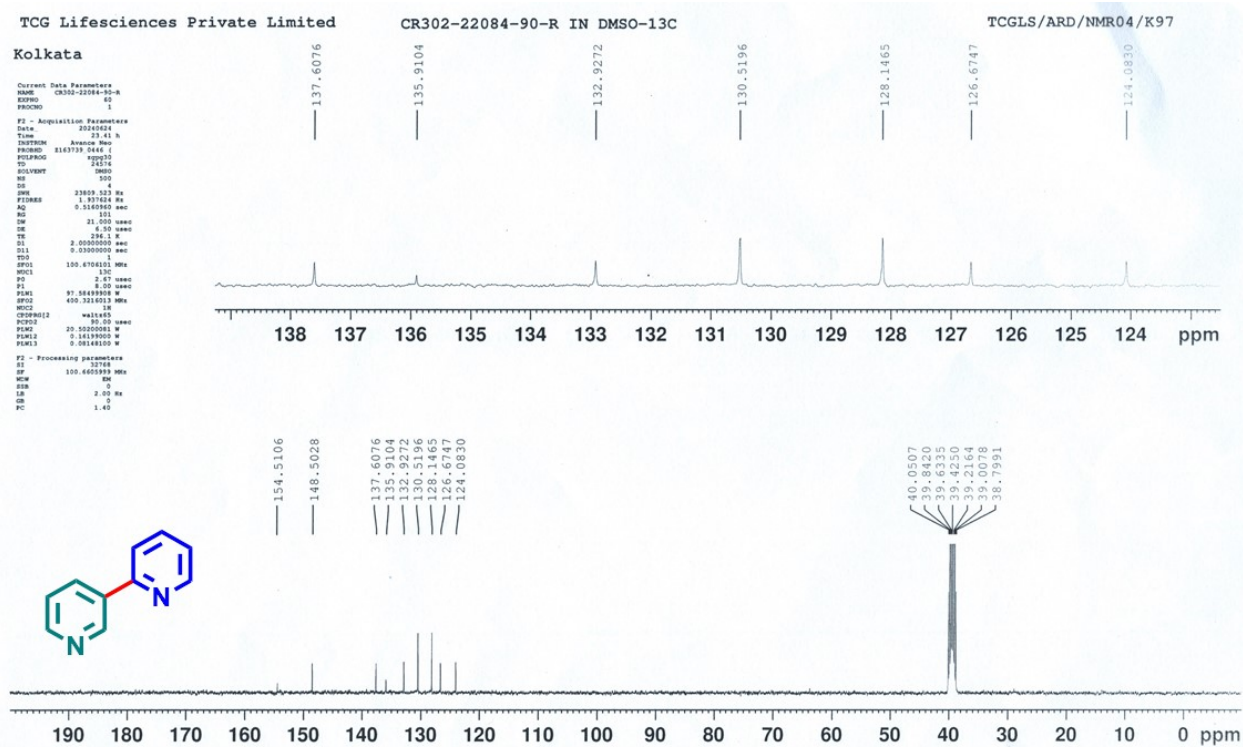

Figure S114:  $^{13}\text{C} \{^1\text{H}\}$  NMR spectrum of **9k**.

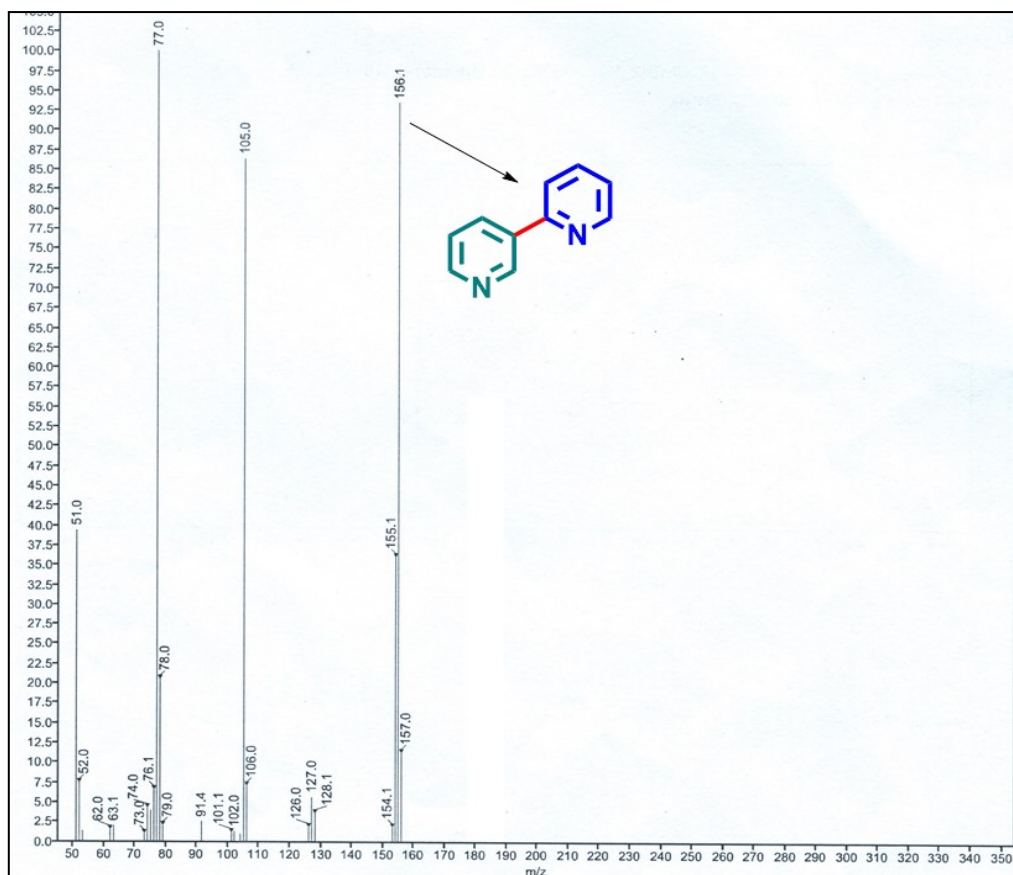

Figure S115: GC-MS spectrum of **9k**.



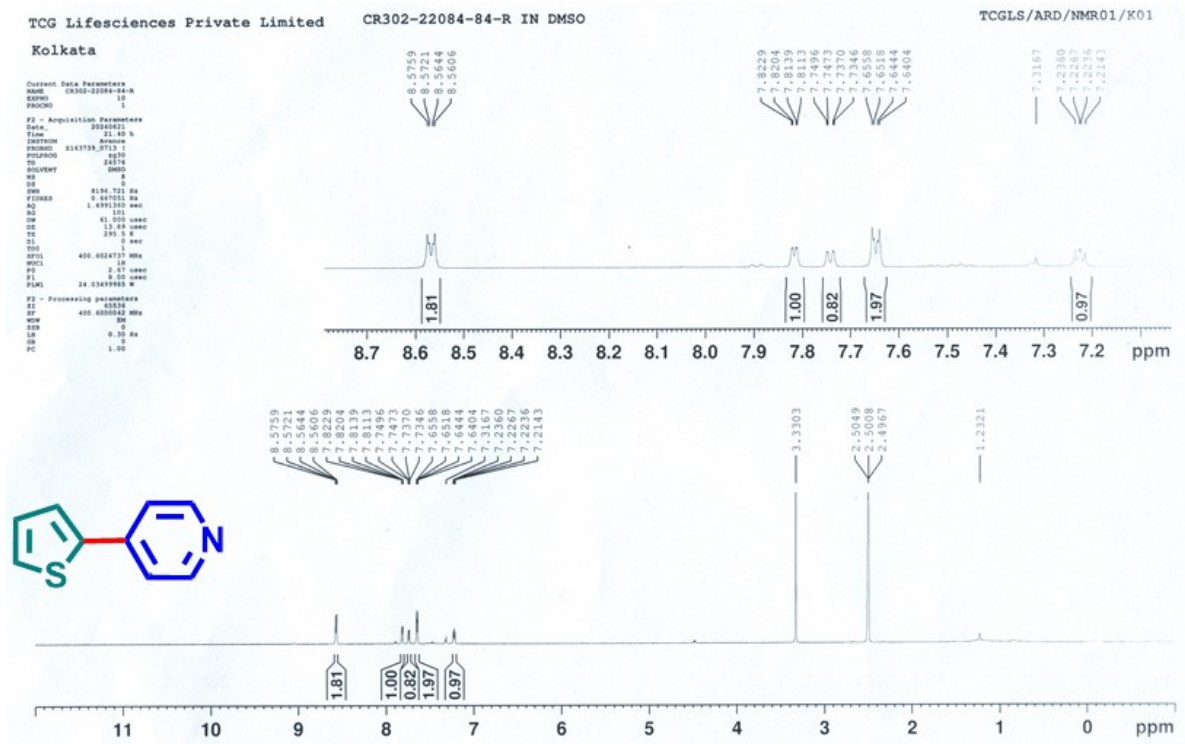

Figure S116:  $^1\text{H}$  NMR spectrum of **9l**.

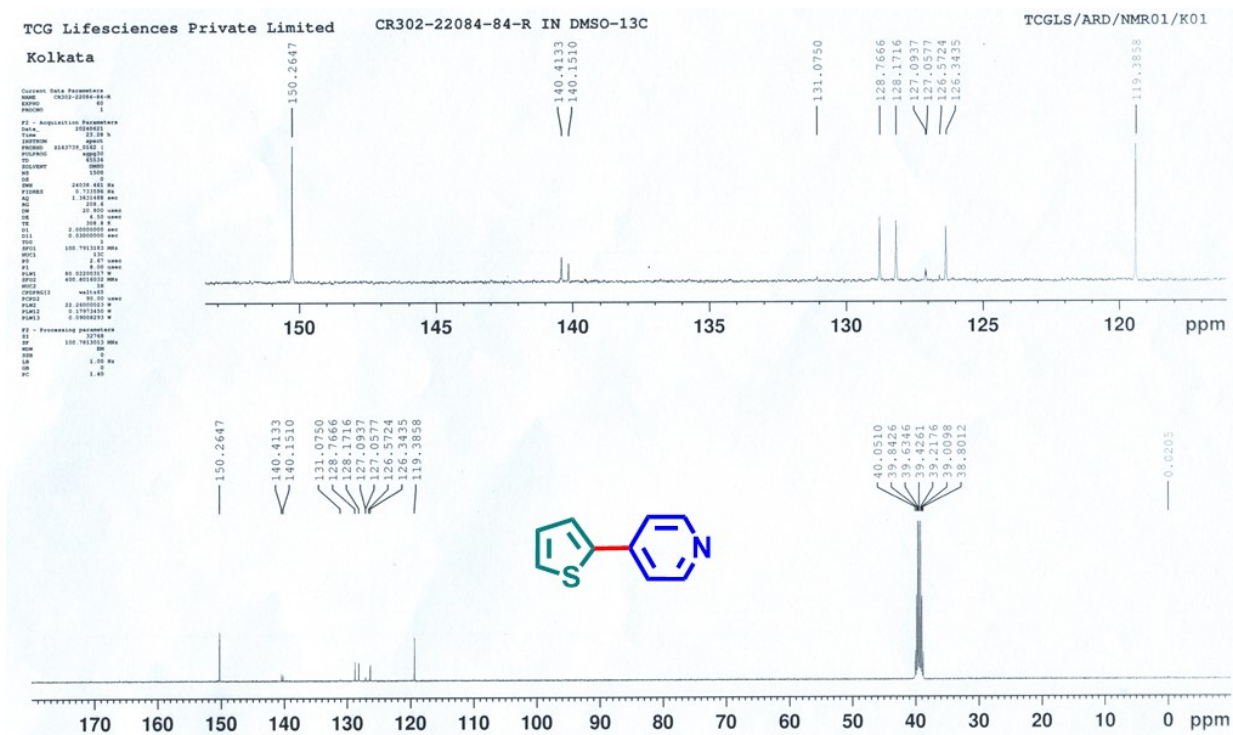

Figure S117:  $^{13}\text{C}$   $\{^1\text{H}\}$  NMR spectrum of **9l**.

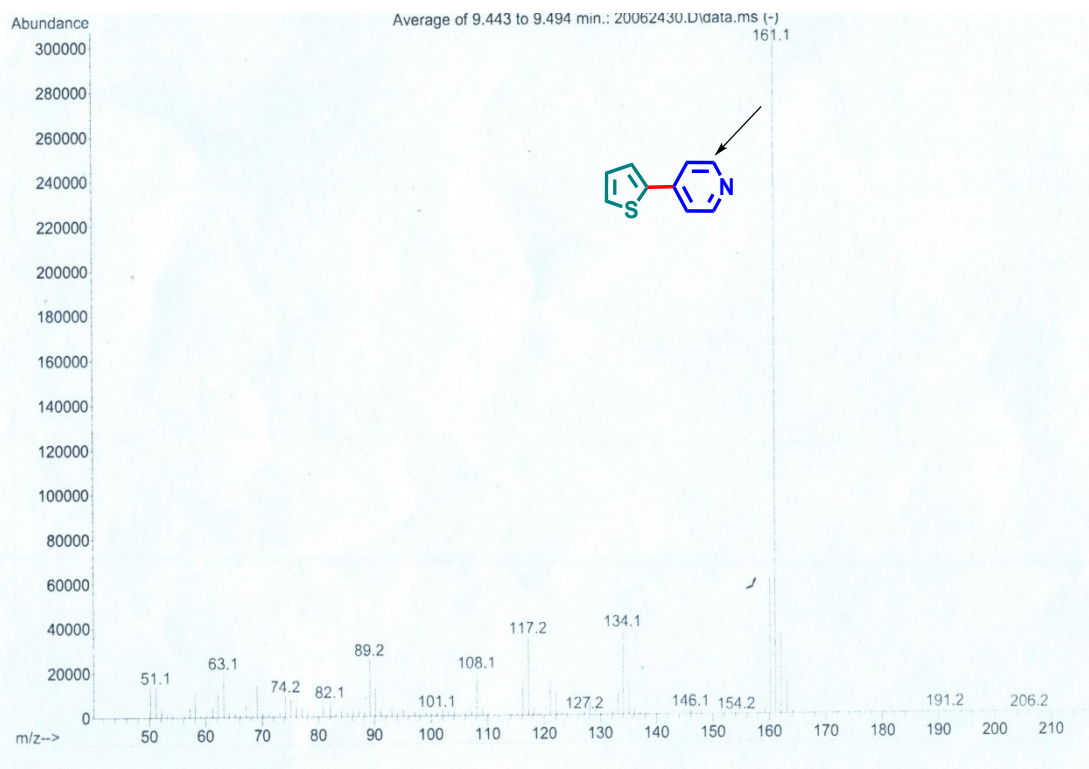

Figure S118: GC-MS spectrum of 9l.

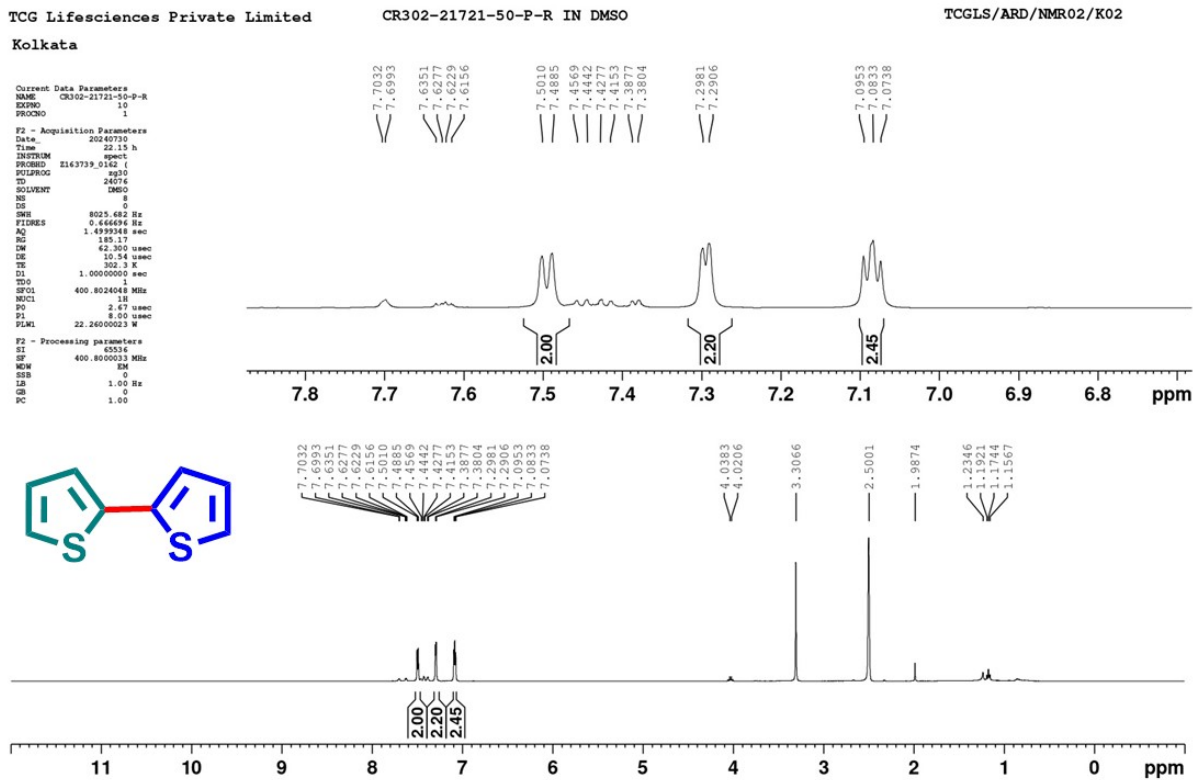

Figure S119:  $^1\text{H}$  NMR spectrum of 9m.

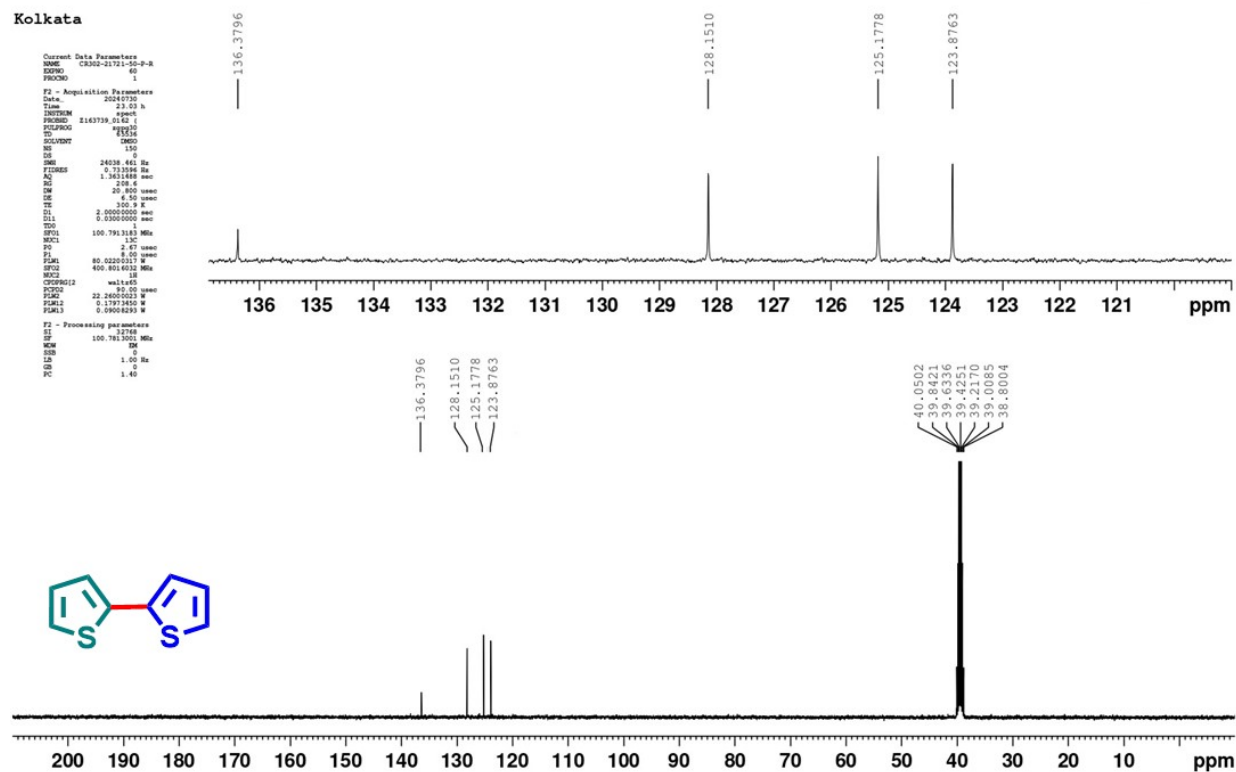

Figure S120:  $^{13}\text{C}$   $\{^1\text{H}\}$  NMR spectrum of **9m**.

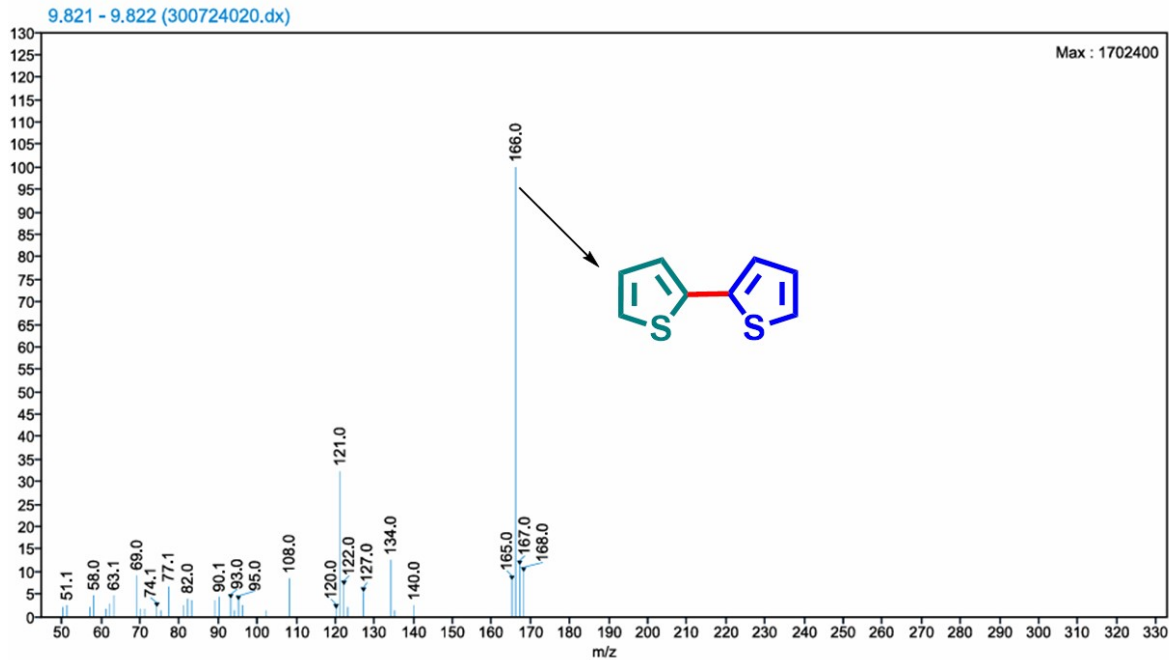

Figure S121: GC-MS spectrum of **9m**.

## 7. Theoretical calculation:

Geometry optimization of the compound **1** and **1a** were carried out with the help of Gaussian16 at ub3lyp level of theory with basis 6-31g(d) for all the elements.

Coordinates of optimized structure **1**:

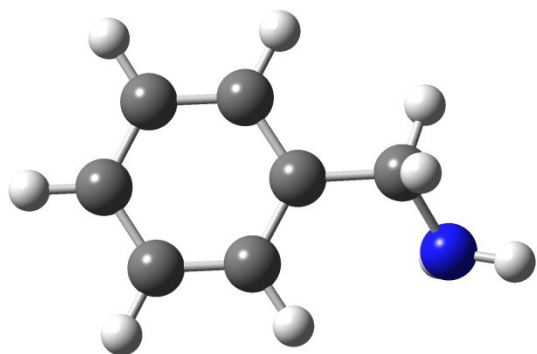

|   |          |          |          |
|---|----------|----------|----------|
| C | -2.23856 | 0.30268  | 0.09986  |
| C | -1.31436 | 1.33526  | -0.10883 |
| C | 0.04727  | 1.03791  | -0.25532 |
| C | 0.4847   | -0.29202 | -0.19311 |
| C | -0.4395  | -1.3246  | 0.01558  |
| C | -1.80113 | -1.02725 | 0.16207  |
| H | -3.2782  | 0.52971  | 0.2117   |
| H | -1.64835 | 2.35069  | -0.15633 |
| H | 0.75292  | 1.8263   | -0.41466 |
| H | -0.10551 | -2.34003 | 0.06308  |
| H | -2.50678 | -1.81565 | 0.32141  |
| C | 1.981    | -0.61878 | -0.35409 |
| N | 2.78471  | 0.50608  | 0.14555  |
| H | 3.75633  | 0.2939   | 0.04103  |
| H | 2.57908  | 0.65928  | 1.11212  |
| H | 2.20103  | -0.7827  | -1.38831 |
| H | 2.21561  | -1.50066 | 0.20461  |

Coordinates of optimized structure **1a**:



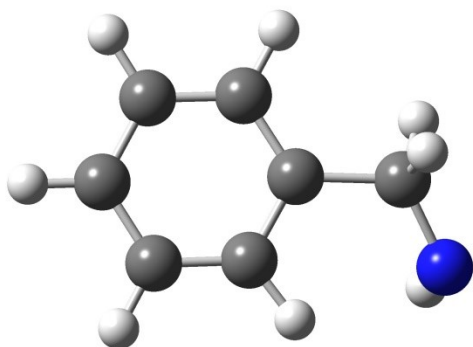

|   |          |          |          |
|---|----------|----------|----------|
| C | 2.18459  | -0.00803 | 0.25956  |
| C | 1.50704  | -1.22816 | 0.13256  |
| C | 0.13677  | -1.2415  | -0.1609  |
| C | -0.55595 | -0.0347  | -0.32735 |
| C | 0.1216   | 1.18543  | -0.20034 |
| C | 1.49187  | 1.19876  | 0.09312  |
| H | 3.23081  | 0.00215  | 0.48362  |
| H | 2.03594  | -2.14958 | 0.25965  |
| H | -0.38055 | -2.17309 | -0.25787 |
| H | -0.4073  | 2.10685  | -0.32743 |
| H | 2.00919  | 2.13036  | 0.19009  |
| C | -2.06173 | -0.04935 | -0.64983 |
| N | -2.83123 | -0.03381 | 0.60258  |
| H | -2.45666 | 0.4148   | 1.41403  |
| H | -2.29933 | -0.93362 | -1.20347 |
| H | -2.31025 | 0.81342  | -1.23186 |

## 8. References:

- [1] J.-H. Kim, J.-W. Kim, M. Shokouhimehr and Y. -S. Lee, *J. Org. Chem.*, 2005, **70**, 6714.
- [2] L. C. Matsinha, J. Mao, S. F. Mapolie and G. S. Smith, *Eur. J. Inorg. Chem.*, 2015, 4088.
- [3] A. Mohammadkhanni, and A. Bazgir, *J. Mol. Catal.*, **447**, 2018, 28.
- [4] L. Bin, W. JiaQing, G. DanHua, L. XinMing, C. XueQin, P. Yue and G. HongWei, *Sci. China Chem.*, 2014, **57**, 1310.

- [5] Y.-T. Wang, B.-B. Gao, F. Wang, S.-Y. Liu, H. Yu, W.-H. Zhang and J.-P. Lang, *Dalton Trans.*, 2017, **46**, 1832.
- [6] W. Zhang, J. Ma, F. Zhou, M. Szostak, and C. Liu, *Org. Chem. Front.*, 2023, **10**, 5698.
- [7] X.-H. Xu, A. Azuma, A. Kusuda, E. Tokunaga and N. Shibata, *Eur. J. Org.*, 2012, 1504.
- [8] A. Link, C. Fischer and C. Sparr, *Angew. Chem. Int. Ed.*, 2015, **54**, 12163.
- [9] L. Bensch, D.-Wirtchem, I. Gruber and T. J. J. Müller, *Chem. Eur. J.*, 2017, **23**, 10551.
- [10] J. Cao, Z.-L. Chen, S.-M. Li, G.-F. Zhu, Y.-Y. Yang, C. Wang, W.-Z. Chen, J.-T. Wang, J.-Q. Zhang and L. Tang, *Eur. J. Org.*, 2018, 2774.
- [11] A. C. García, L. Pisani, M. d. C. Núñez, M. Catto, O. Nicolotti, F. Leonetti, J. M. Campos, M. A. Gallo, A. Espinosa and A. Carotti, *J. Med. Chem.*, 2011, **54**, 2627.
- [12] H. Xu, J. Bijleveld, M. Hedge and T. Dingemans, *Polym. Chem.*, 2019, **10**, 5052.
- [13] T. E. Storr and M. F. Greaney, *Org. Lett.* 2013, **15**, 1410.
- [14] E. L. Kolychev, A. F. Asachenko, P. B. Dzhevakov, A. A. Bush, V. V. Shuntikov, V. N. Khrustalev and M. S. Nechaev, *Dalton Trans.*, 2013, **42**, 6859.
- [15] A. L. Stein, F. N. Bilheria and G. Zeni, *Chem. Commun.*, 2015, **51**, 15522.
- [16] T.-J. Lu, P.-H. Lin, K.-M. Lee, C.-Y. Liu, *Eur. J. Org.*, 2017, 111.
- [17] G. Zhang, H. Yi, H. Chen, C. Bian, C. Liu and A. Lei, *Org. Lett.*, 2014, **16**, 6156.
- [18] H. Prokopcová and C. O. Kappe, *J. Org. Chem.*, 2007, **72**, 4440.
- [19] J.-F. Huang, J.-M. Liu, P.-Y. Su, Y.-F. Chen, Y. Shen, L.-M. Xiao, D.-B. Kuang and C.-Y. Su, *Electrochim. Acta.*, 2015, **174**, 494.
- [20] J. E. Namanga, N. Gerlitzki, V. Smetana, and A.-V. Mudring, *ACS Appl. Mater. Interfaces.*, 2018, **10**, 11026.
- [21] X. Lei, Y. Wang, S. Ma and P. Jiao, *J. Org. Chem.*, 2024, **89**, 7148.
- [22] L. Wang, X. Cui, J. Li, Y. Wu, Z. Zhu, and Y. Wu, *Eur. J. Org.*, 2012, 595.
- [23] A. Xia, X. Qi, X. Mao, X. Wu, X. Yang, R. Zhang, Z. Xiang, Z. Lian, Y. Chen, and S. Yang, *Org. Lett.*, 2019, **21**, 3028.
- [24] T. Yurino, Y. Ueda, Y. Shimizu, S. Tanaka, H. Nishiyama, H. Tsurugi, K. Sato, and K. Mashima, *Angew. Chem. Int. Ed.*, 2015, **54**, 14437.
